# Supplementary material for: Dihydroquinolines, Dihydronaphthyridines and Quinolones by Domino Reactions of Morita-Baylis-Hillman Acetates
Source: MDPI journal article supplement (doi:10.3390/molecules26040890), 2021-02-08
Supplement: s1 [file s1]

# Dihydroquinolines, Dihydronaphthyridines and Quinolones by Domino Reactions of Morita-Baylis-Hillman Acetates

Joel K. Annor-Gyamfi, Eben Ametsetor, Kevin Meraz and Richard A. Bunce\*

Department of Chemistry, Oklahoma State University, Stillwater, OK. 74078-3071, USA  
jannorg@okstate.edu (J.K.A.), eametse@okstate.edu (E.A.), meraz.kevin@outlook.com  
(K.M.)

\* Author to whom correspondence should be addressed; E-mail: rab@okstate.edu;  
Tel.: +1-405-744-5952

## Supplementary Material

| Compound                                                                                                 | page |
|----------------------------------------------------------------------------------------------------------|------|
| <sup>1</sup> H NMR for 2-Cyano-1-(2-fluoropyridin-3-yl)allyl acetate ( <b>6</b> ) .....                  | 4    |
| <sup>13</sup> C NMR for 2-Cyano-1-(2-fluoropyridin-3-yl)allyl acetate ( <b>6</b> ) .....                 | 4    |
| <sup>1</sup> H NMR for Ethyl 2-(acetoxymethyl-2,5-difluorophenyl)methylacrylate ( <b>7</b> ).....        | 5    |
| <sup>13</sup> C NMR for Ethyl 2-(acetoxymethyl-2,5-difluorophenyl)methylacrylate ( <b>7</b> ).....       | 5    |
| <sup>1</sup> H NMR for Ethyl 1-methyl-6-nitro-1,2-dihydroquinoline-3-carboxylate ( <b>9a</b> ) .....     | 6    |
| <sup>13</sup> C NMR for Ethyl 1-methyl-6-nitro-1,2-dihydroquinoline-3-carboxylate ( <b>9a</b> ) .....    | 6    |
| <sup>1</sup> H NMR for Ethyl 1-hexyl-6-nitro-1,2-dihydroquinoline-3-carboxylate ( <b>9b</b> ) .....      | 7    |
| <sup>13</sup> C NMR for Ethyl 1-hexyl-6-nitro-1,2-dihydroquinoline-3-carboxylate ( <b>9b</b> ) .....     | 7    |
| <sup>1</sup> H NMR for Ethyl 1-isobutyl-6-nitro-1,2-dihydroquinoline-3-carboxylate ( <b>9c</b> ) .....   | 8    |
| <sup>13</sup> C NMR for Ethyl 1-isobutyl-6-nitro-1,2-dihydroquinoline-3-carboxylate ( <b>9c</b> ) .....  | 8    |
| <sup>1</sup> H NMR for Ethyl 1-benzyl-6-nitro-1,2-dihydroquinoline-3-carboxylate ( <b>9d</b> ) .....     | 9    |
| <sup>13</sup> C NMR for Ethyl 1-benzyl-6-nitro-1,2-dihydroquinoline-3-carboxylate ( <b>9d</b> ) .....    | 9    |
| <sup>1</sup> H NMR for Ethyl 6-nitro-1-phenethyl-1,2-dihydroquinoline-3-carboxylate ( <b>9e</b> ) .....  | 10   |
| <sup>13</sup> C NMR for Ethyl 6-nitro-1-phenethyl-1,2-dihydroquinoline-3-carboxylate ( <b>9e</b> ) ..... | 10   |
| <sup>1</sup> H NMR for Ethyl 6-nitro-1-phenyl-1,2-dihydroquinoline-3-carboxylate ( <b>9f</b> ) .....     | 11   |
| <sup>13</sup> C NMR for Ethyl 6-nitro-1-phenyl-1,2-dihydroquinoline-3-carboxylate ( <b>9f</b> ) .....    | 11   |
| <sup>1</sup> H NMR for 1-Methyl-6-nitro-1,2-dihydroquinoline-3-carbonitrile ( <b>10a</b> ) .....         | 12   |
| <sup>13</sup> C NMR for 1-Methyl-6-nitro-1,2-dihydroquinoline-3-carbonitrile ( <b>10a</b> ) .....        | 12   |
| <sup>1</sup> H NMR for 1-Hexyl-6-nitro-1,2-dihydroquinoline-3-carbonitrile ( <b>10b</b> ) .....          | 13   |
| <sup>13</sup> C NMR for 1-Hexyl-6-nitro-1,2-dihydroquinoline-3-carbonitrile ( <b>10b</b> ) .....         | 13   |
| <sup>1</sup> H NMR for 1-Isobutyl-6-nitro-1,2-dihydroquinoline-3-carbonitrile ( <b>10c</b> ) .....       | 14   |
| <sup>13</sup> C NMR for 1-Isobutyl-6-nitro-1,2-dihydroquinoline-3-carbonitrile ( <b>10c</b> ) .....      | 14   |
| <sup>1</sup> H NMR for 1-Benzyl-6-nitro-1,2-dihydroquinoline-3-carbonitrile ( <b>10d</b> ) .....         | 15   |
| <sup>13</sup> C NMR for 1-Benzyl-6-nitro-1,2-dihydroquinoline-3-carbonitrile ( <b>10d</b> ) .....        | 15   |
| <sup>1</sup> H NMR for 6-Nitro-1-phenethyl-1,2-dihydroquinoline-3-carbonitrile ( <b>10e</b> ) .....      | 16   |

|                                                                                                            |    |
|------------------------------------------------------------------------------------------------------------|----|
| <sup>13</sup> C NMR for 6-Nitro-1-phenethyl-1,2-dihydroquinoline-3-carbonitrile ( <b>10e</b> ) .....       | 16 |
| <sup>1</sup> H NMR for 6-Nitro-1-phenyl-1,2-dihydroquinoline-3-carbonitrile ( <b>10f</b> ) .....           | 17 |
| <sup>13</sup> C NMR for 6-Nitro-1-phenyl-1,2-dihydroquinoline-3-carbonitrile ( <b>10f</b> ) .....          | 17 |
| <sup>1</sup> H NMR for Ethyl 6-cyano-1-methyl-1,2-dihydroquinoline-3-carboxylate ( <b>11a</b> ) .....      | 18 |
| <sup>13</sup> C NMR for Ethyl 6-cyano-1-methyl-1,2-dihydroquinoline-3-carboxylate ( <b>11a</b> ) .....     | 18 |
| <sup>1</sup> H NMR for Ethyl 6-cyano-1-hexyl-1,2-dihydroquinoline-3-carboxylate ( <b>11b</b> ) .....       | 19 |
| <sup>13</sup> C NMR for Ethyl 6-cyano-1-hexyl-1,2-dihydroquinoline-3-carboxylate ( <b>11b</b> ) .....      | 19 |
| <sup>1</sup> H NMR for Ethyl 6-cyano-1-isobutyl-1,2-dihydroquinoline-3-carboxylate ( <b>11c</b> ) .....    | 20 |
| <sup>13</sup> C NMR for Ethyl 6-cyano-1-isobutyl-1,2-dihydroquinoline-3-carboxylate ( <b>11c</b> ) .....   | 20 |
| <sup>1</sup> H NMR for Ethyl 1-benzyl-6-cyano-1,2-dihydroquinoline-3-carboxylate ( <b>11d</b> ) .....      | 21 |
| <sup>13</sup> C NMR for Ethyl 1-benzyl-6-cyano-1,2-dihydroquinoline-3-carboxylate ( <b>11d</b> ) .....     | 21 |
| <sup>1</sup> H NMR for Ethyl 6-cyano-1-phenethyl-1,2-dihydroquinoline-3-carboxylate ( <b>11e</b> ) .....   | 22 |
| <sup>13</sup> C NMR for Ethyl 6-cyano-1-phenethyl-1,2-dihydroquinoline-3-carboxylate ( <b>11e</b> ) .....  | 22 |
| <sup>1</sup> H NMR for Ethyl 6-cyano-1-phenyl-1,2-dihydroquinoline-3-carboxylate ( <b>11f</b> ) .....      | 23 |
| <sup>13</sup> C NMR for Ethyl 6-cyano-1-phenyl-1,2-dihydroquinoline-3-carboxylate ( <b>11f</b> ) .....     | 23 |
| <sup>1</sup> H NMR for 1-Methyl-1,2-dihydroquinoline-3,6-dicarbonitrile ( <b>12a</b> ) .....               | 24 |
| <sup>13</sup> C NMR for 1-Methyl-1,2-dihydroquinoline-3,6-dicarbonitrile ( <b>12a</b> ) .....              | 24 |
| <sup>1</sup> H NMR for 1-Hexyl-1,2-dihydroquinoline-3,6-dicarbonitrile ( <b>12b</b> ) .....                | 25 |
| <sup>13</sup> C NMR for 1-Hexyl-1,2-dihydroquinoline-3,6-dicarbonitrile ( <b>12b</b> ) .....               | 25 |
| <sup>1</sup> H NMR for 1-Isobutyl-1,2-dihydroquinoline-3,6-dicarbonitrile ( <b>12c</b> ) .....             | 26 |
| <sup>13</sup> C NMR for 1-Isobutyl-1,2-dihydroquinoline-3,6-dicarbonitrile ( <b>12c</b> ) .....            | 26 |
| <sup>1</sup> H NMR for 1-Benzyl-1,2-dihydroquinoline-3,6-dicarbonitrile ( <b>12d</b> ) .....               | 27 |
| <sup>13</sup> C NMR for 1-Benzyl-1,2-dihydroquinoline-3,6-dicarbonitrile ( <b>12d</b> ) .....              | 27 |
| <sup>1</sup> H NMR for 1-Phenethyl-1,2-dihydroquinoline-3,6-dicarbonitrile ( <b>12e</b> ) .....            | 28 |
| <sup>13</sup> C NMR for 1-Phenethyl-1,2-dihydroquinoline-3,6-dicarbonitrile ( <b>12e</b> ) .....           | 28 |
| <sup>1</sup> H NMR for Ethyl 1-methyl-1,2-dihydro-1,8-naphthyridine-3-carboxylate ( <b>13a</b> ) .....     | 29 |
| <sup>13</sup> C NMR for Ethyl 1-methyl-1,2-dihydro-1,8-naphthyridine-3-carboxylate ( <b>13a</b> ) .....    | 29 |
| <sup>1</sup> H NMR for Ethyl 1-hexyl-1,2-dihydro-1,8-naphthyridine-3-carboxylate ( <b>13b</b> ) .....      | 30 |
| <sup>13</sup> C NMR for Ethyl 1-hexyl-1,2-dihydro-1,8-naphthyridine-3-carboxylate ( <b>13b</b> ) .....     | 30 |
| <sup>1</sup> H NMR for Ethyl 1-isobutyl-1,2-dihydro-1,8-naphthyridine-3-carboxylate ( <b>13c</b> ) .....   | 31 |
| <sup>13</sup> C NMR for Ethyl 1-isobutyl-1,2-dihydro-1,8-naphthyridine-3-carboxylate ( <b>13c</b> ) .....  | 31 |
| <sup>1</sup> H NMR for Ethyl 1-benzyl-1,2-dihydro-1,8-naphthyridine-3-carboxylate ( <b>13d</b> ) .....     | 32 |
| <sup>13</sup> C NMR for Ethyl 1-benzyl-1,2-dihydro-1,8-naphthyridine-3-carboxylate ( <b>13d</b> ) .....    | 32 |
| <sup>1</sup> H NMR for Ethyl 1-phenethyl-1,2-dihydro-1,8-naphthyridine-3-carboxylate ( <b>13e</b> ) .....  | 33 |
| <sup>13</sup> C NMR for Ethyl 1-phenethyl-1,2-dihydro-1,8-naphthyridine-3-carboxylate ( <b>13e</b> ) ..... | 33 |
| <sup>1</sup> H NMR for Ethyl 1-phenyl-1,2-dihydro-1,8-naphthyridine-3-carboxylate ( <b>13f</b> ) .....     | 34 |
| <sup>13</sup> C NMR for Ethyl 1-phenyl-1,2-dihydro-1,8-naphthyridine-3-carboxylate ( <b>13f</b> ) .....    | 34 |
| <sup>1</sup> H NMR for 1-Hexyl-1,2-dihydro-1,8-naphthyridine-3-carbonitrile ( <b>14b</b> ) .....           | 35 |
| <sup>13</sup> C NMR for 1-Hexyl-1,2-dihydro-1,8-naphthyridine-3-carbonitrile ( <b>14b</b> ) .....          | 35 |
| <sup>1</sup> H NMR for 1-Benzyl-1,2-dihydro-1,8-naphthyridine-3-carbonitrile ( <b>14d</b> ) .....          | 36 |
| <sup>13</sup> C NMR for 1-Benzyl-1,2-dihydro-1,8-naphthyridine-3-carbonitrile ( <b>14d</b> ) .....         | 36 |

|                                                                                                       |    |
|-------------------------------------------------------------------------------------------------------|----|
| <sup>1</sup> H NMR for 1-Phenethyl-1,2-dihydro-1,8-naphthyridine-3-carbonitrile ( <b>14e</b> ) .....  | 37 |
| <sup>13</sup> C NMR for 1-Phenethyl-1,2-dihydro-1,8-naphthyridine-3-carbonitrile ( <b>14e</b> ) ..... | 37 |

#### Unexpected double bond-migrated products:

|                                                                                           |    |
|-------------------------------------------------------------------------------------------|----|
| <sup>1</sup> H NMR for 1-Benzyl-1,4-dihydroquinoline-3-carbonitrile ( <b>15d</b> ) .....  | 38 |
| <sup>13</sup> C NMR for 1-Benzyl-1,4-dihydroquinoline-3-carbonitrile ( <b>15d</b> ) ..... | 38 |
| <sup>1</sup> H NMR for 1-Phenyl-1,4-dihydroquinoline-3-carbonitrile ( <b>15f</b> ) .....  | 39 |
| <sup>13</sup> C NMR for 1-Phenyl-1,4-dihydroquinoline-3-carbonitrile ( <b>15f</b> ) ..... | 39 |

#### Control Reaction:

|                                                                                                             |    |
|-------------------------------------------------------------------------------------------------------------|----|
| <sup>1</sup> H for (Z)-2-((Benzylamino)methyl)-3-(2-fluoro-5-nitrophenyl)acrylonitrile ( <b>16</b> ) .....  | 40 |
| <sup>13</sup> C for (Z)-2-((Benzylamino)methyl)-3-(2-fluoro-5-nitrophenyl)acrylonitrile ( <b>16</b> ) ..... | 40 |

|                                                                                                                  |    |
|------------------------------------------------------------------------------------------------------------------|----|
| <sup>1</sup> H NMR for ethyl 6-fluoro-1-methyl-1,2-dihydroquinoline-3-carboxylate ( <b>18a</b> ) .....           | 41 |
| <sup>13</sup> C NMR for ethyl 6-fluoro-1-methyl-1,2-dihydroquinoline-3-carboxylate ( <b>18a</b> ) .....          | 41 |
| <sup>1</sup> H NMR for ethyl 6-fluoro-1-hexyl-1,2-dihydroquinoline-3-carboxylate ( <b>18b</b> ) .....            | 42 |
| <sup>13</sup> C NMR for ethyl 6-fluoro-1-hexyl-1,2-dihydroquinoline-3-carboxylate ( <b>18b</b> ) .....           | 42 |
| <sup>1</sup> H NMR for ethyl 6-fluoro-1-isobutyl-1,2-dihydroquinoline-3-carboxylate ( <b>18c</b> ) .....         | 43 |
| <sup>13</sup> C NMR for ethyl 6-fluoro-1-isobutyl-1,2-dihydroquinoline-3-carboxylate ( <b>18c</b> ) .....        | 43 |
| <sup>1</sup> H NMR for ethyl 1-benzyl-6-fluoro-1,2-dihydroquinoline-3-carboxylate ( <b>18d</b> ) .....           | 44 |
| <sup>13</sup> C NMR for ethyl 1-benzyl-6-fluoro-1,2-dihydroquinoline-3-carboxylate ( <b>18d</b> ) .....          | 44 |
| <sup>1</sup> H NMR for ethyl 6-fluoro-1-phenethyl-1,2-dihydroquinoline-3-carboxylate ( <b>18e</b> ) .....        | 45 |
| <sup>13</sup> C NMR for ethyl 6-fluoro-1-phenethyl-1,2-dihydroquinoline-3-carboxylate ( <b>18e</b> ) .....       | 45 |
| <sup>1</sup> H NMR for ethyl 6-fluoro-1-methyl-4-oxo-1,4-dihydroquinoline-3-carboxylate ( <b>19a</b> ) .....     | 46 |
| <sup>13</sup> C NMR for ethyl 6-fluoro-1-methyl-4-oxo-1,4-dihydroquinoline-3-carboxylate ( <b>19a</b> ) .....    | 46 |
| <sup>1</sup> H NMR for ethyl 6-fluoro-1-isobutyl-4-oxo-1,4-dihydroquinoline-3-carboxylate ( <b>19c</b> ) .....   | 47 |
| <sup>13</sup> C NMR for ethyl 6-fluoro-1-isobutyl-4-oxo-1,4-dihydroquinoline-3-carboxylate ( <b>19c</b> ) .....  | 47 |
| <sup>1</sup> H NMR for ethyl 1-benzyl-6-fluoro-4-oxo-1,4-dihydroquinoline-3-carboxylate ( <b>19d</b> ) .....     | 48 |
| <sup>13</sup> C NMR for ethyl 1-benzyl-6-fluoro-4-oxo-1,4-dihydroquinoline-3-carboxylate ( <b>19d</b> ) .....    | 48 |
| <sup>1</sup> H NMR for ethyl 6-fluoro-4-oxo-1-phenethyl-1,4-dihydroquinoline-3-carboxylate ( <b>19e</b> ) .....  | 49 |
| <sup>13</sup> C NMR for ethyl 6-fluoro-4-oxo-1-phenethyl-1,4-dihydroquinoline-3-carboxylate ( <b>19e</b> ) ..... | 49 |

#### X-ray Data:

|                                                                                                                       |       |
|-----------------------------------------------------------------------------------------------------------------------|-------|
| 1-Benzyl-1,4-dihydroquinoline-3-carbonitrile ( <b>15d</b> , EB-1- UNK-Bn, CCDC 2035027) .....                         | 50-59 |
| (Z)-2-((Benzylamino)methyl)-3-(2-fluoro-5-nitrophenyl)acrylonitrile ( <b>16</b> , EB-1-INT-6,<br>CCDC 2035028) .....  | 60-69 |
| Ethyl 6-fluoro-4-oxo-1-phenethyl-1,4-dihydroquinoline-3-carboxylate ( <b>19e</b> , KEVJAG-1-64,<br>CCDC 2057847)..... | 70-79 |

$^1\text{H}$  NMR for 2-Cyano-1-(2-fluoropyridin-3-yl)allyl acetate (**6**)

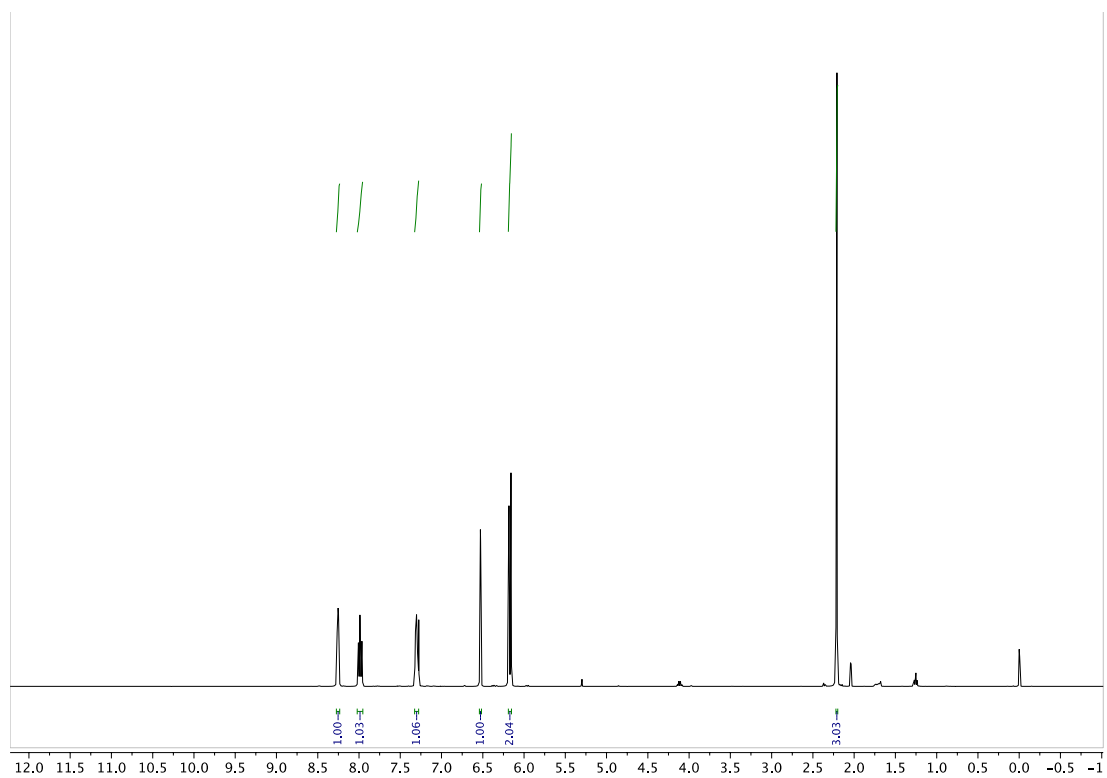

$^{13}\text{C}$  NMR for 2-cyano-1-(2-fluoropyridin-3-yl)allyl acetate (**6**)

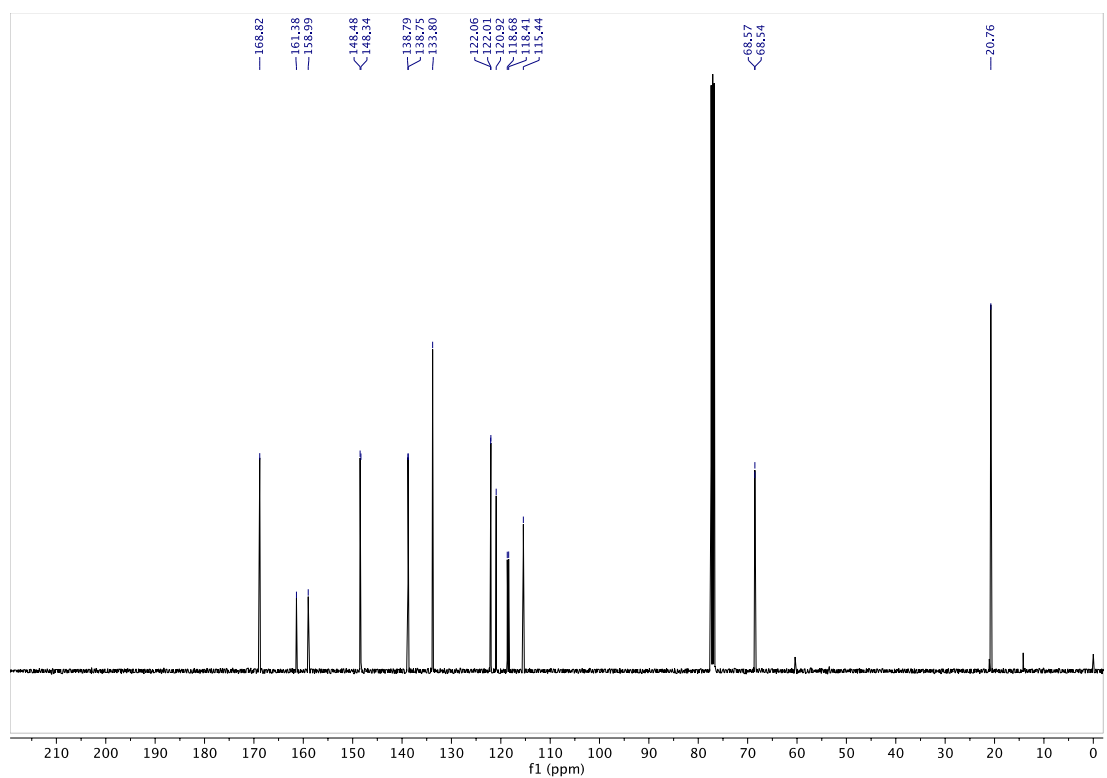

$^1\text{H}$  NMR for ethyl 2-(acetoxy(2,5-difluorophenyl)methyl)acrylate (7)

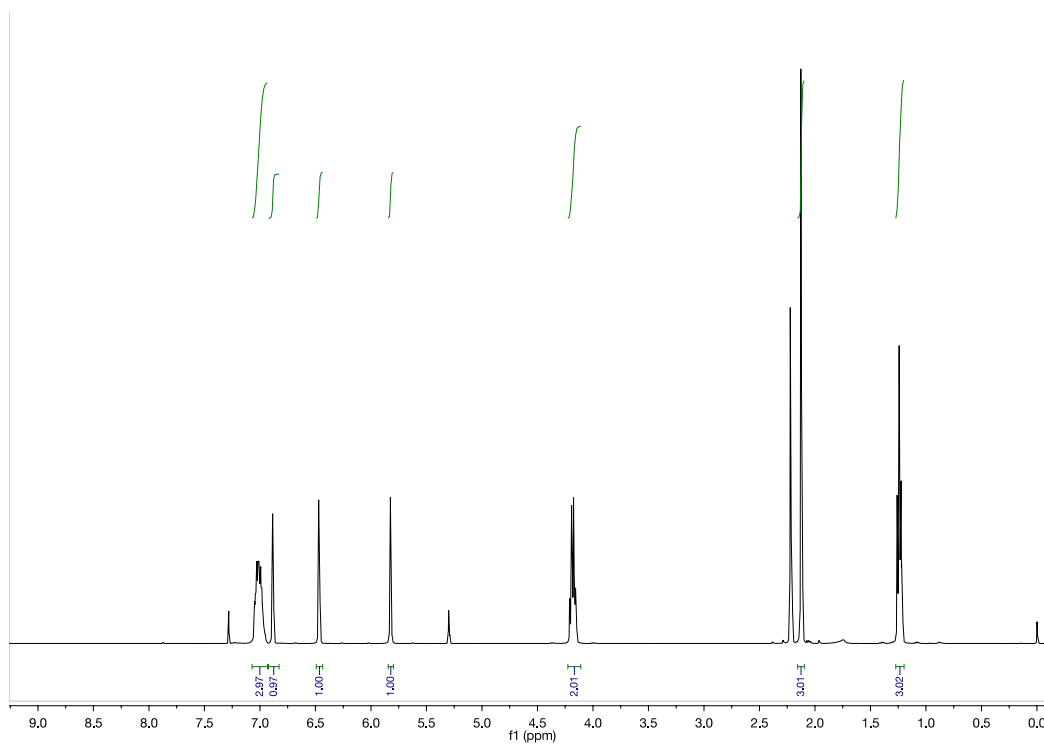

$^{13}\text{C}$  NMR for ethyl 2-(acetoxy(2,5-difluorophenyl)methyl)acrylate (7)

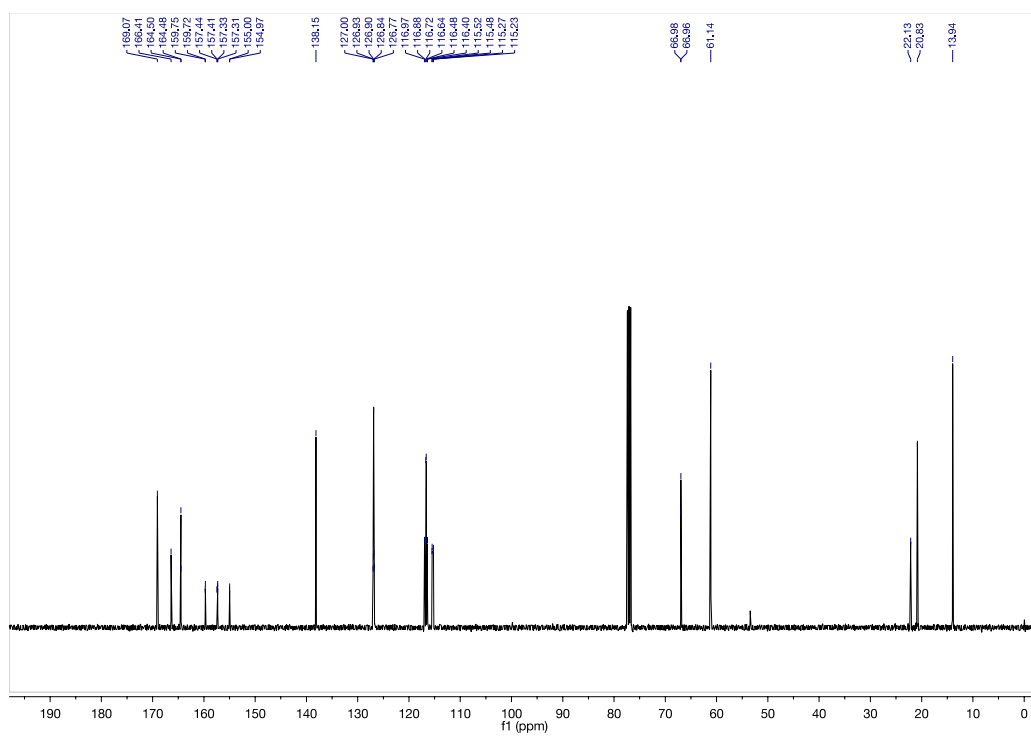

$^1\text{H}$  NMR for Ethyl 1-methyl-6-nitro-1,2-dihydroquinoline-3-carboxylate (**9a**)

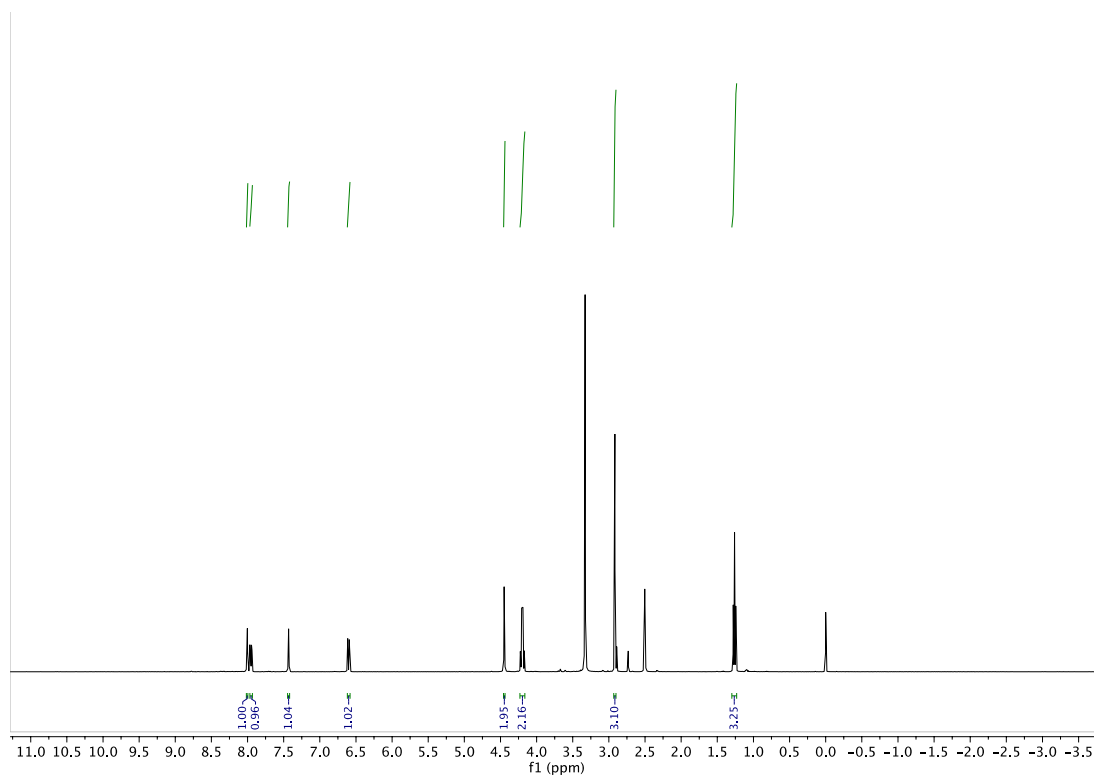

$^{13}\text{C}$  NMR for Ethyl 1-methyl-6-nitro-1,2-dihydroquinoline-3-carboxylate (**9a**)

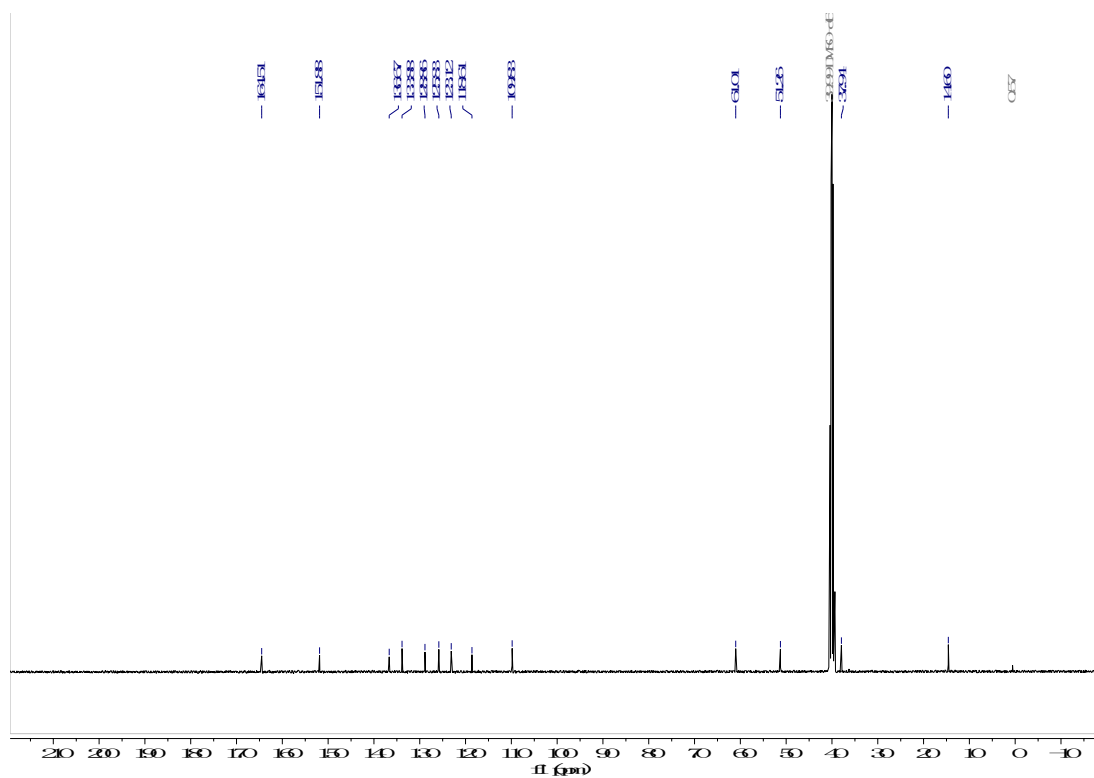

$^1\text{H}$  NMR for Ethyl 1-hexyl-6-nitro-1,2-dihydroquinoline-3-carboxylate (**9b**)

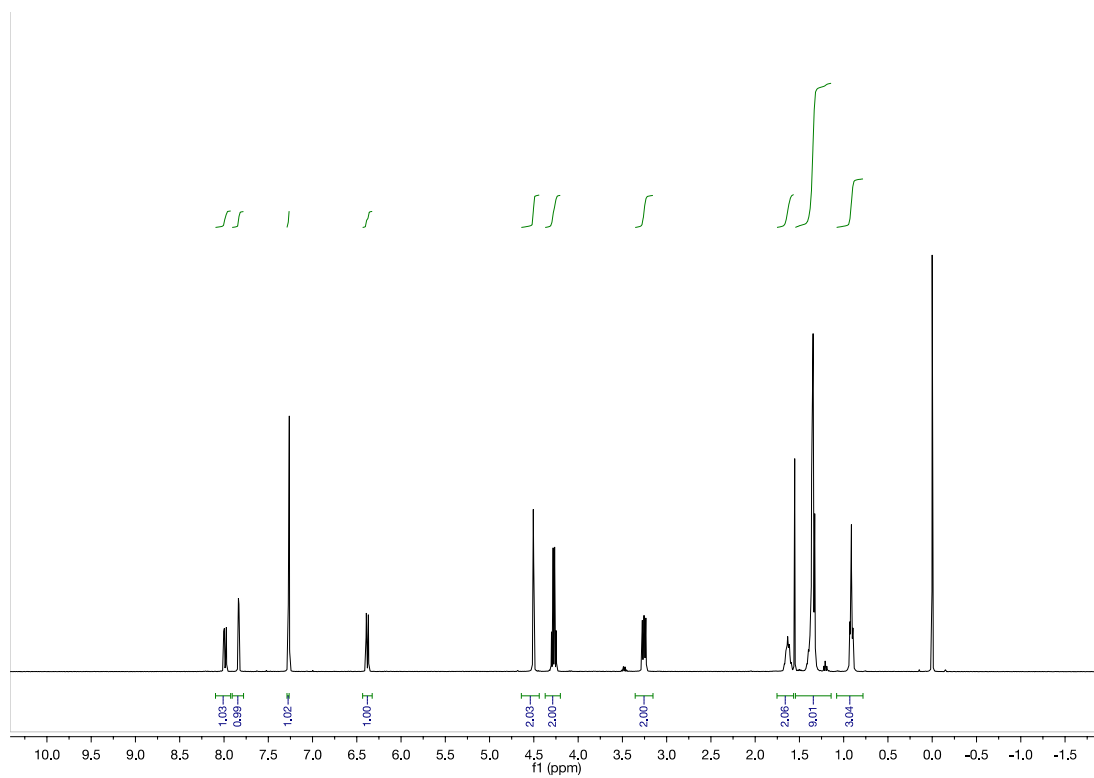

$^{13}\text{C}$  NMR for Ethyl 1-hexyl-6-nitro-1,2-dihydroquinoline-3-carboxylate (**9b**)

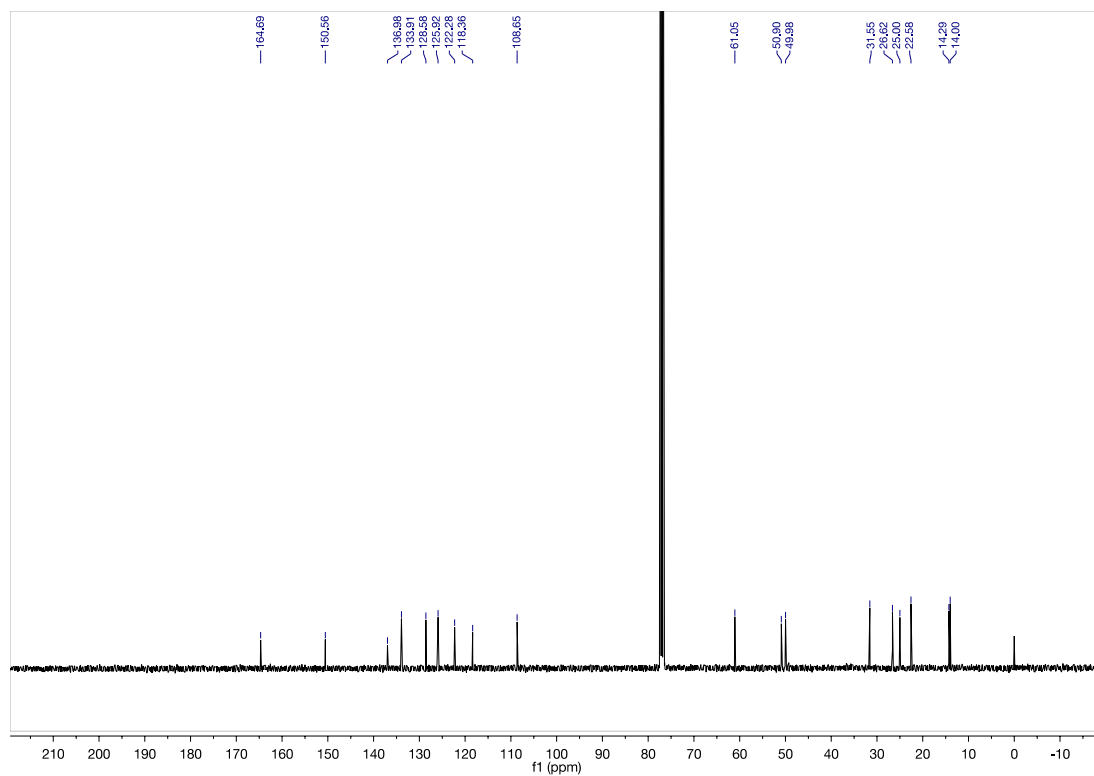

$^1\text{H}$  NMR for Ethyl 1-isobutyl-6-nitro-1,2-dihydroquinoline-3-carboxylate (**9c**)

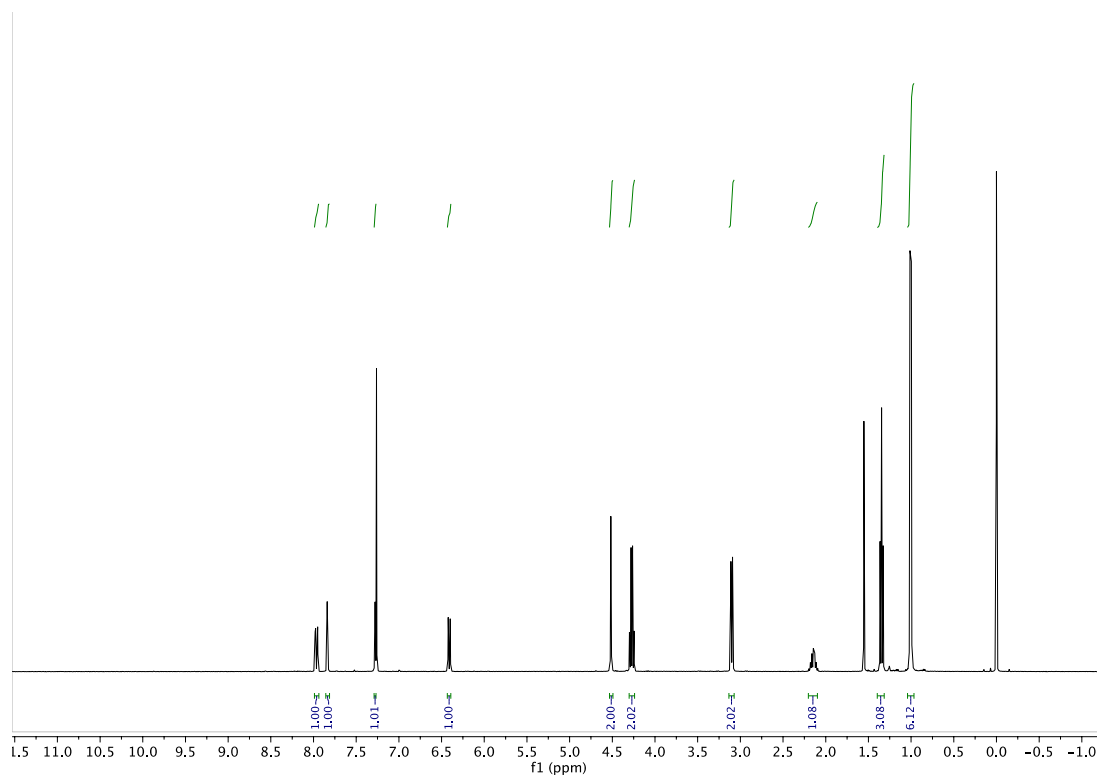

$^{13}\text{C}$  NMR for Ethyl 1-isobutyl-6-nitro-1,2-dihydroquinoline-3-carboxylate (**9c**)

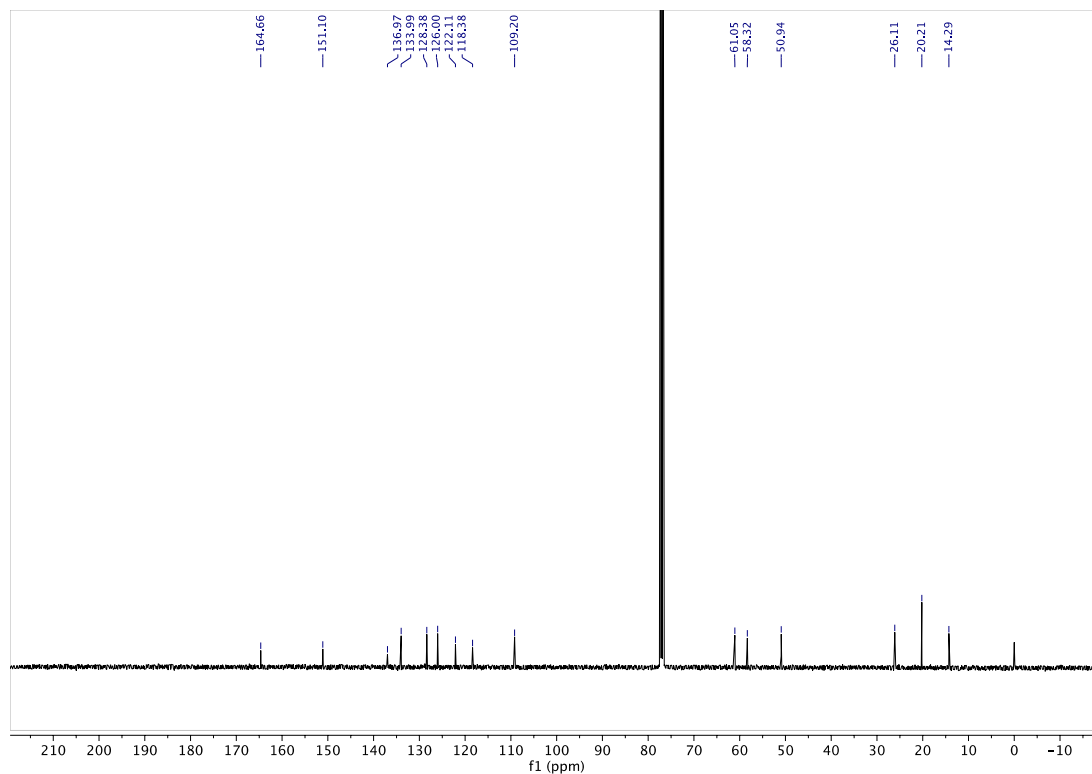



$^1\text{H}$  NMR for Ethyl 1-benzyl-6-nitro-1,2-dihydroquinoline-3-carboxylate (**9d**)

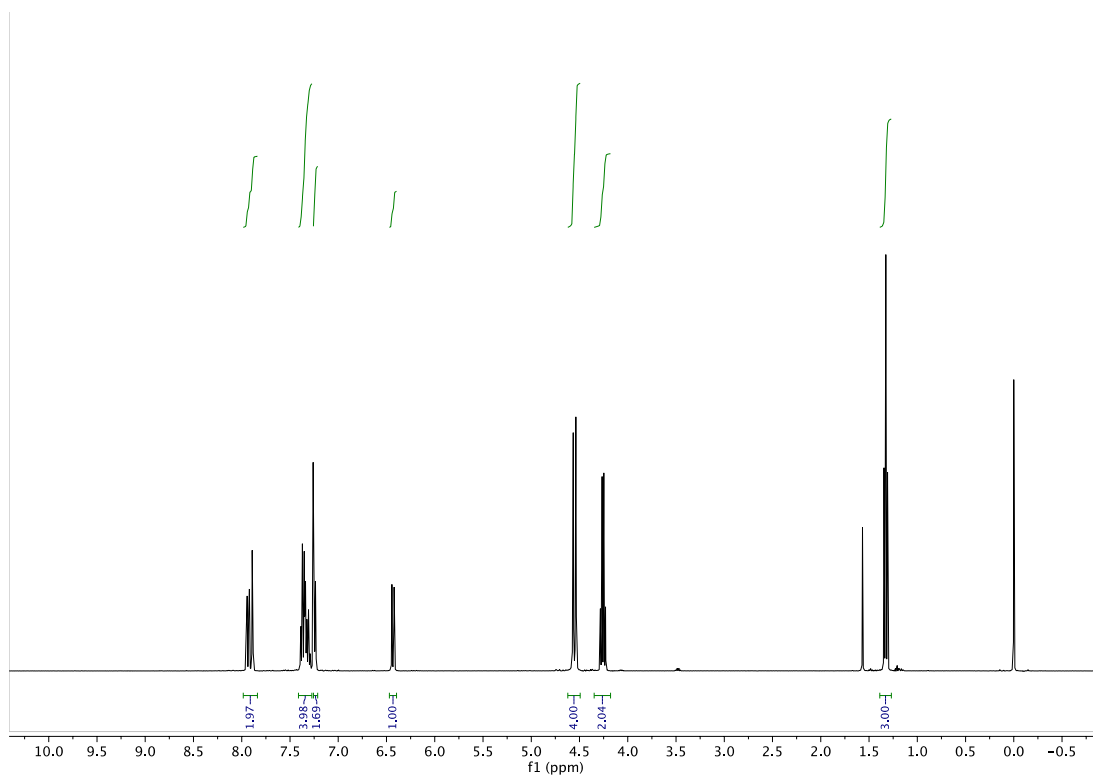

$^{13}\text{C}$  NMR for Ethyl 1-benzyl-6-nitro-1,2-dihydroquinoline-3-carboxylate (**9d**)

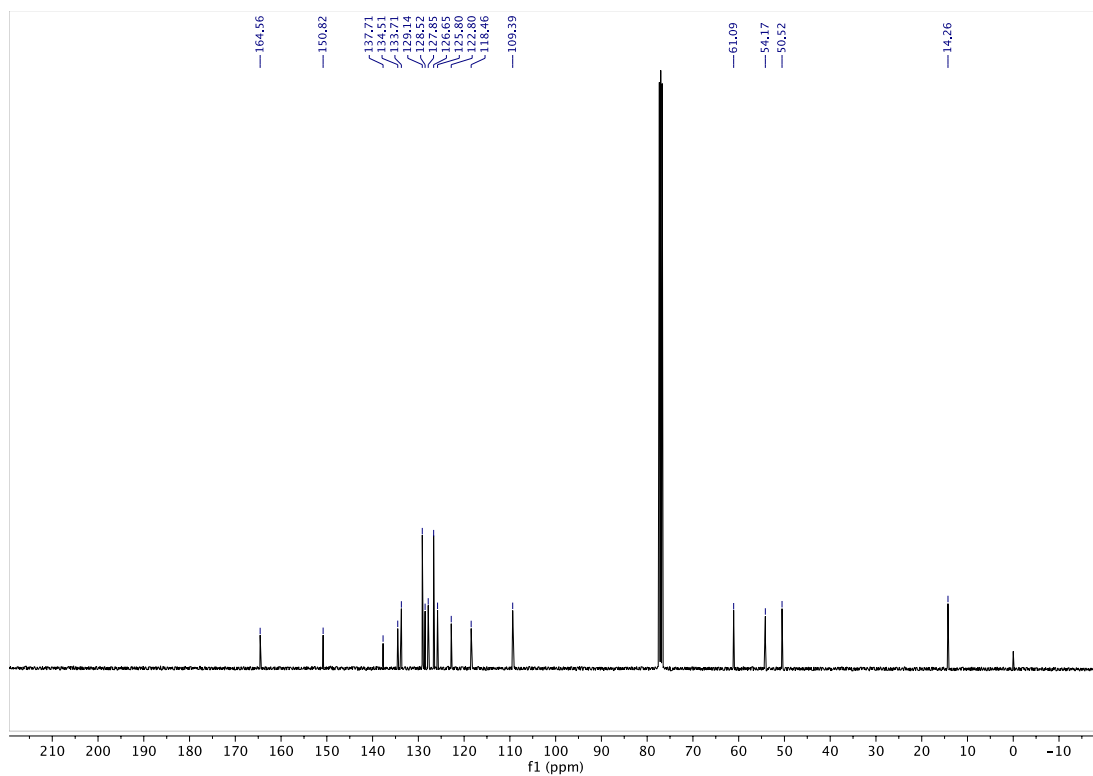

$^1\text{H}$  NMR for Ethyl 6-nitro-1-phenethyl-1,2-dihydroquinoline-3-carboxylate (**9e**)

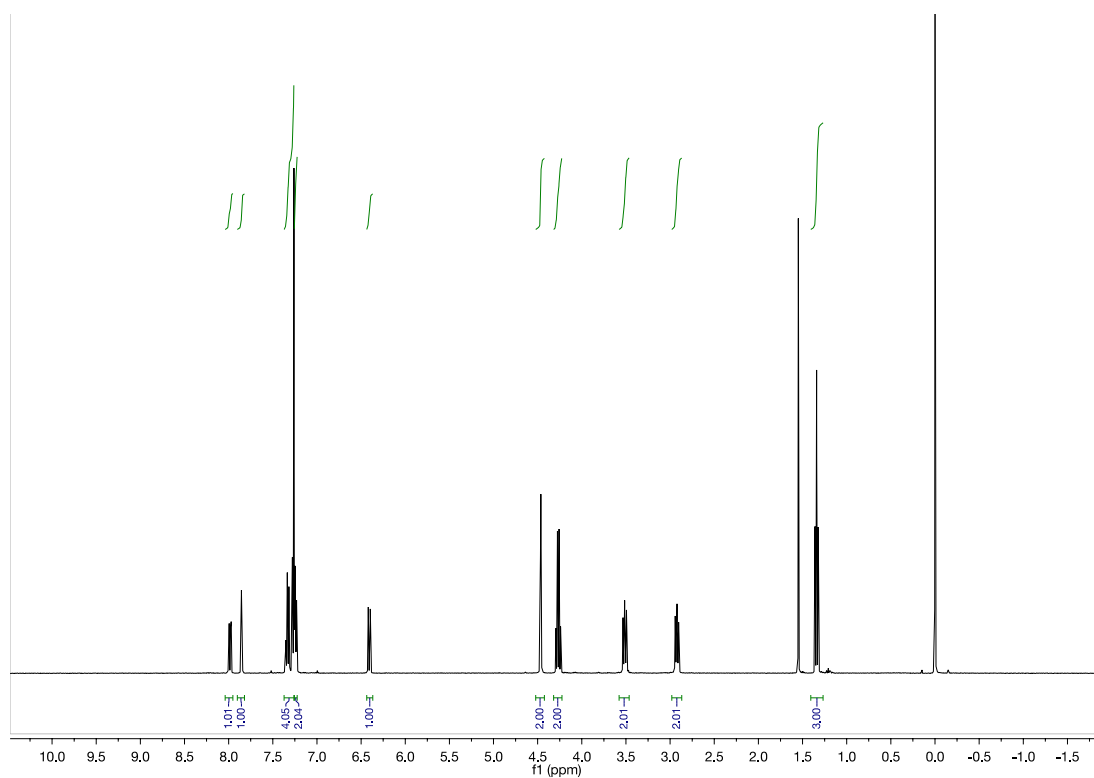

$^{13}\text{C}$  NMR for Ethyl 6-nitro-1-phenethyl-1,2-dihydroquinoline-3-carboxylate (**9e**)

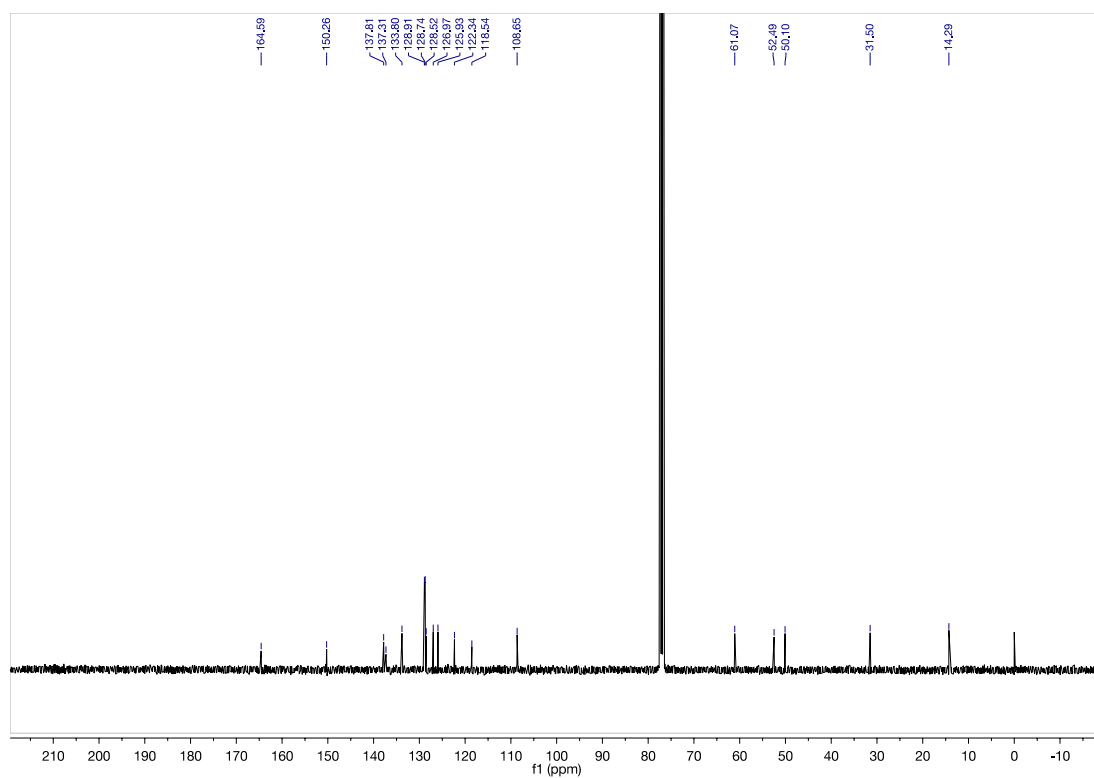

$^1\text{H}$  NMR for Ethyl 6-nitro-1-phenyl-1,2-dihydroquinoline-3-carboxylate (**9f**)

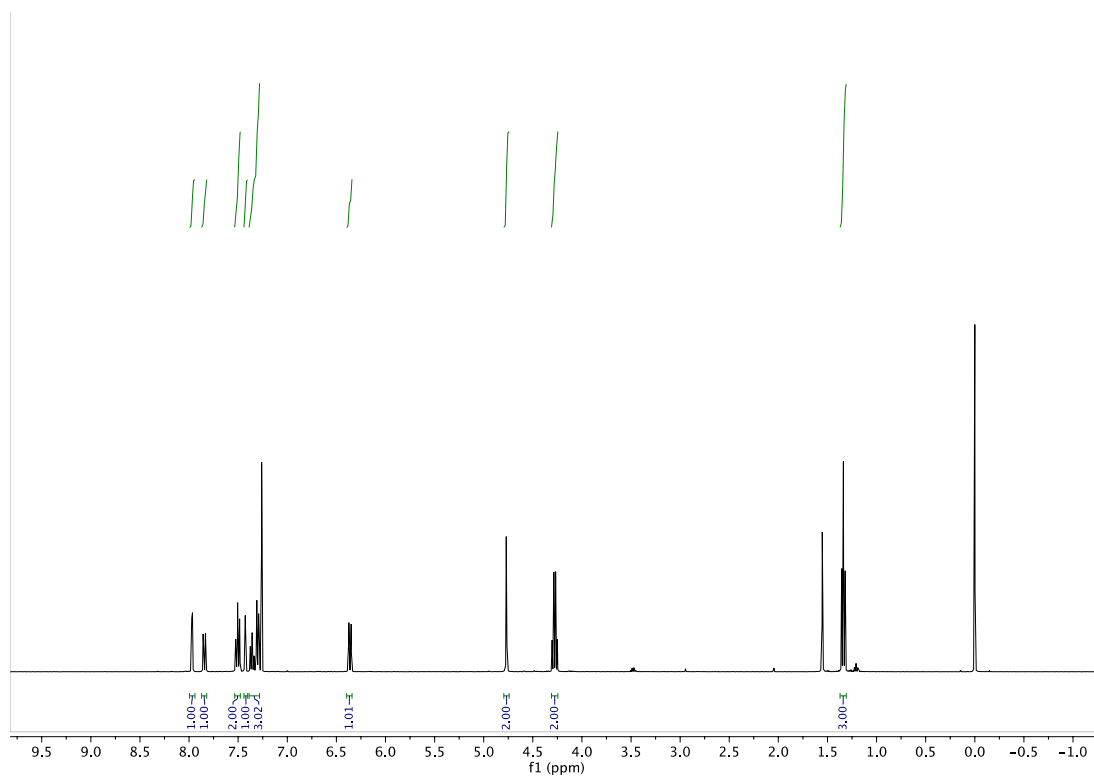

$^{13}\text{C}$  NMR for Ethyl 6-nitro-1-phenyl-1,2-dihydroquinoline-3-carboxylate (**9f**)

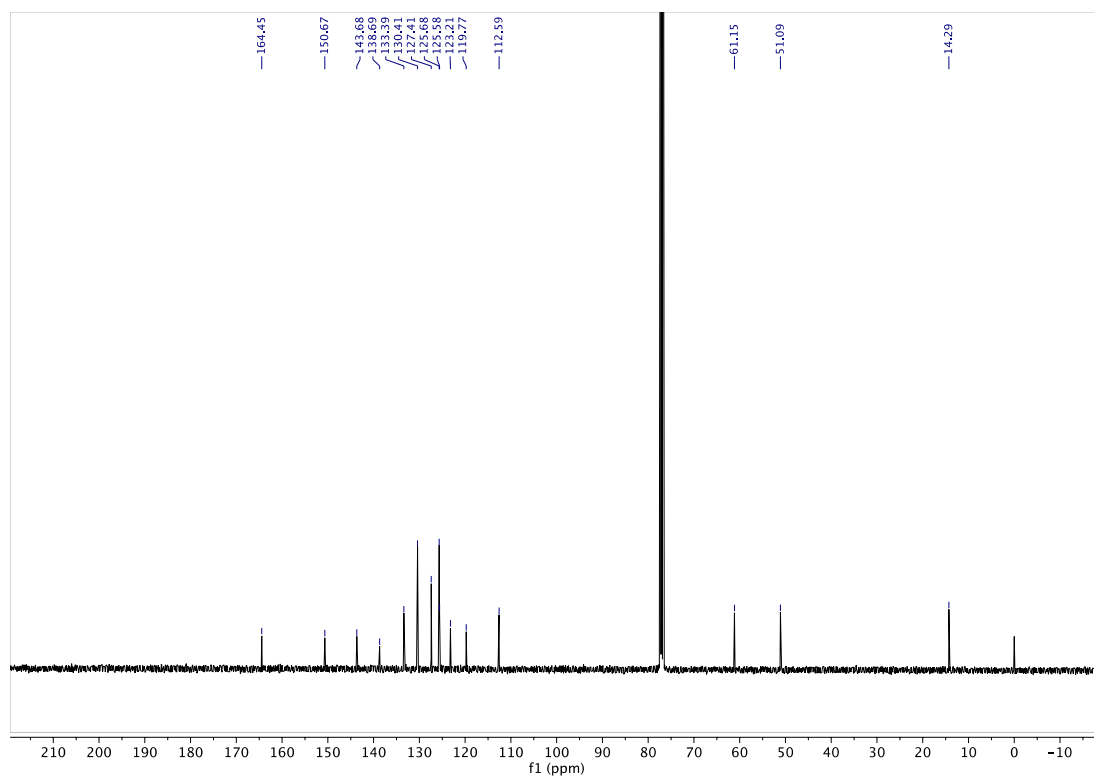

$^1\text{H}$  NMR for 1-Methyl-6-nitro-1,2-dihydroquinoline-3-carbonitrile (**10a**)

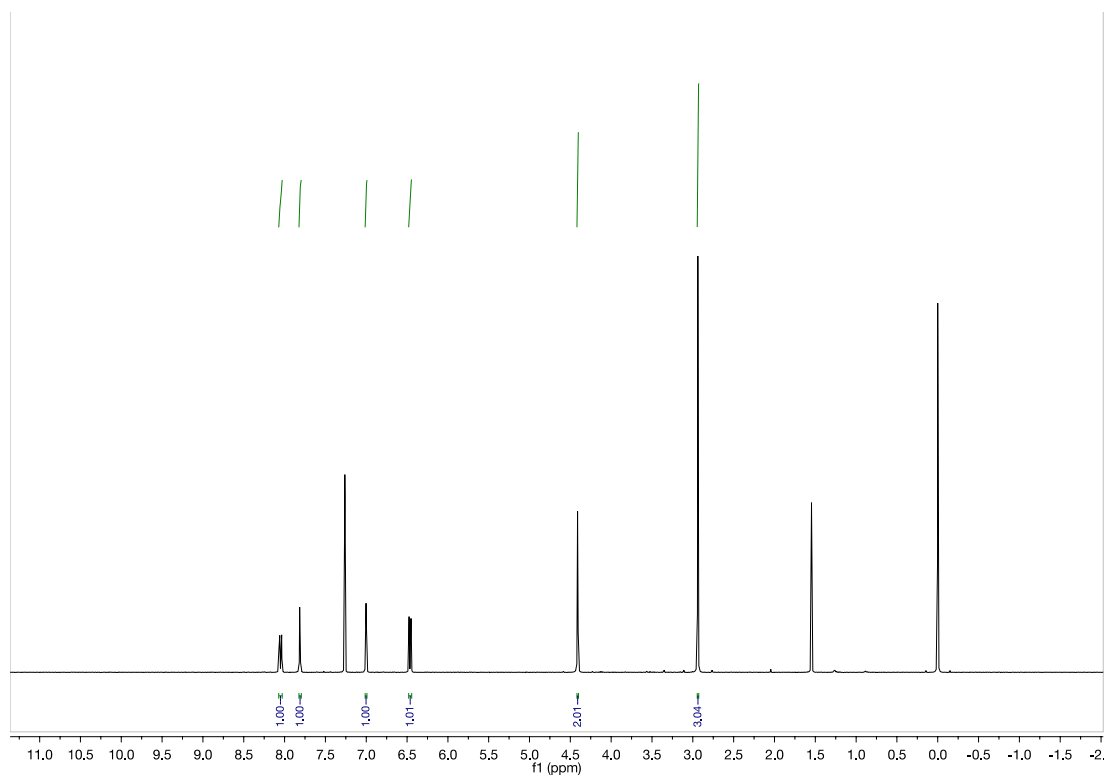

$^{13}\text{C}$  NMR for 1-Methyl-6-nitro-1,2-dihydroquinoline-3-carbonitrile (**10a**)

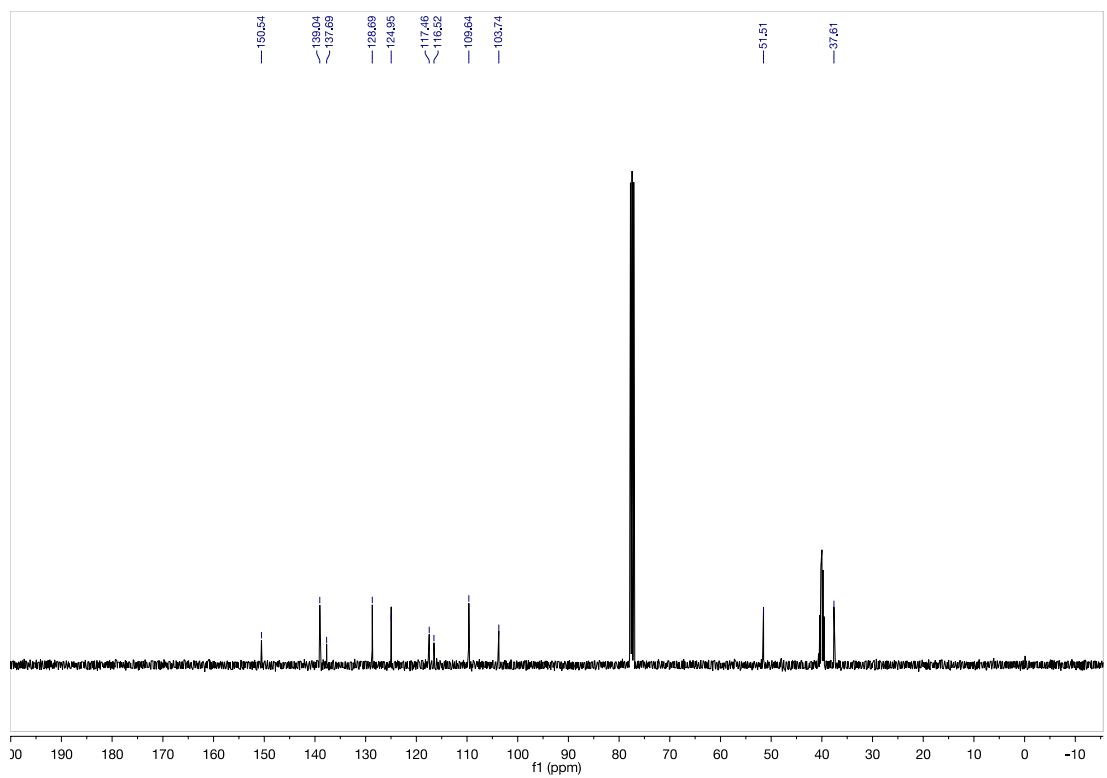

$^1\text{H}$  NMR for 1-Hexyl-6-nitro-1,2-dihydroquinoline-3-carbonitrile (**10b**)

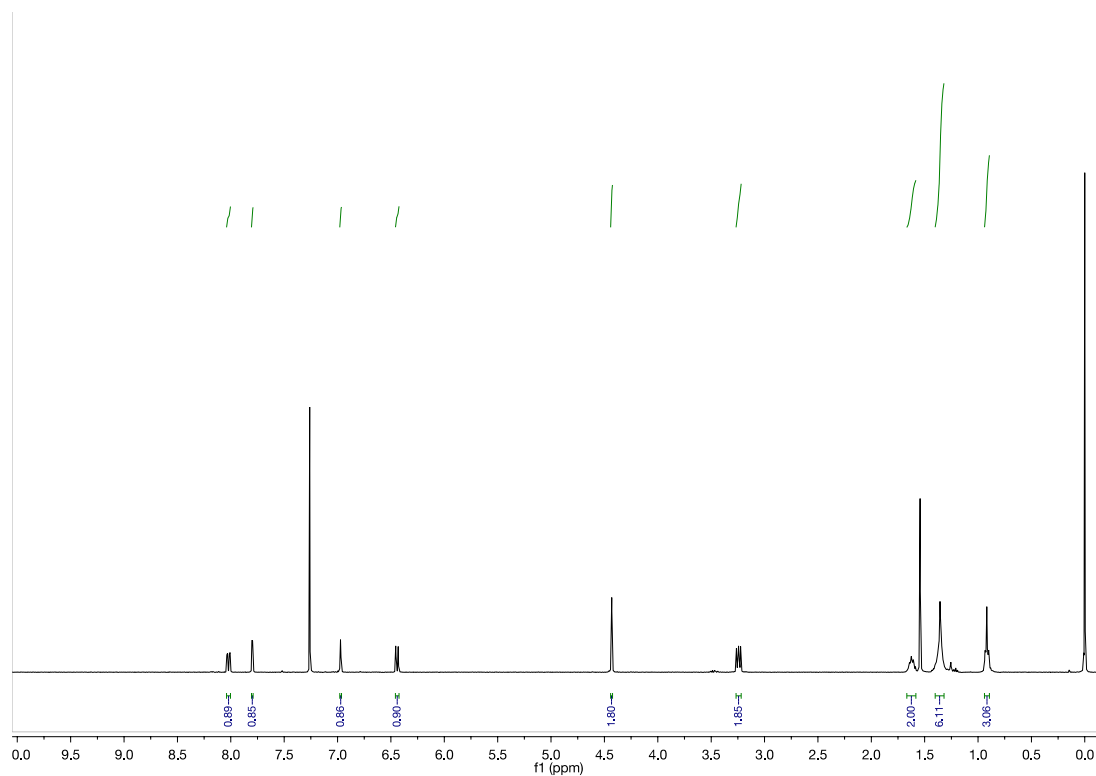

$^{13}\text{C}$  NMR for 1-Hexyl-6-nitro-1,2-dihydroquinoline-3-carbonitrile (**10b**)

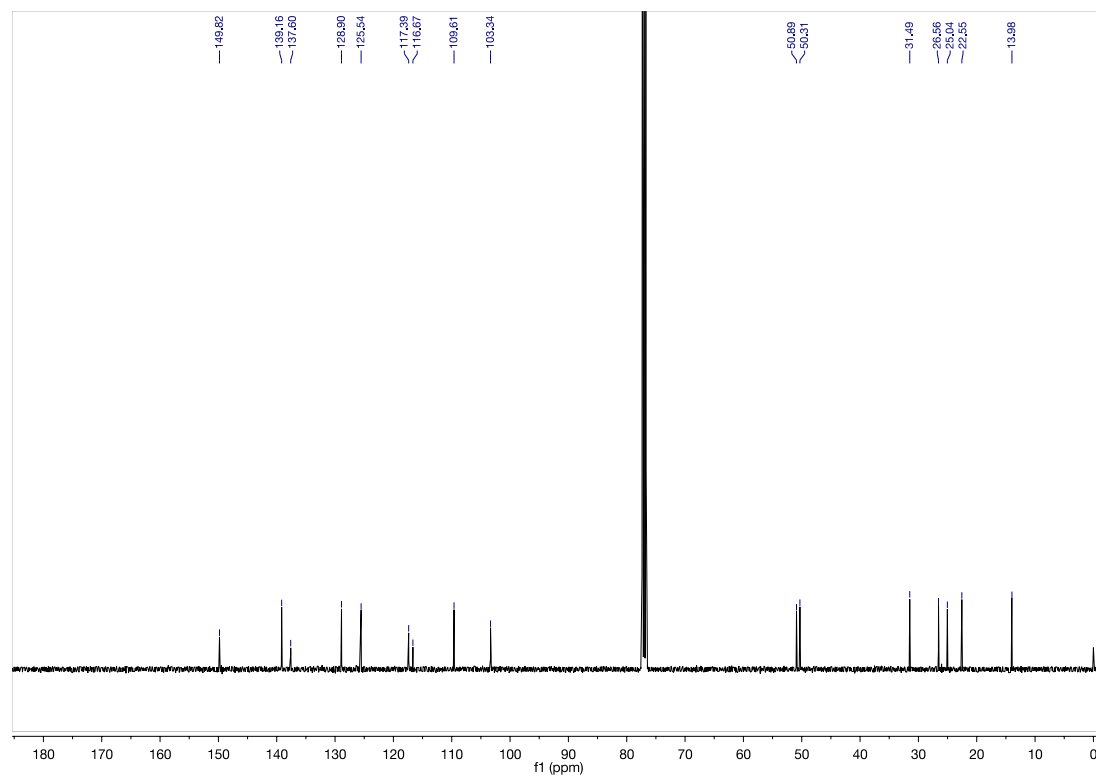

<sup>1</sup>H NMR for 1-Isobutyl-6-nitro-1,2-dihydroquinoline-3-carbonitrile (**10c**)

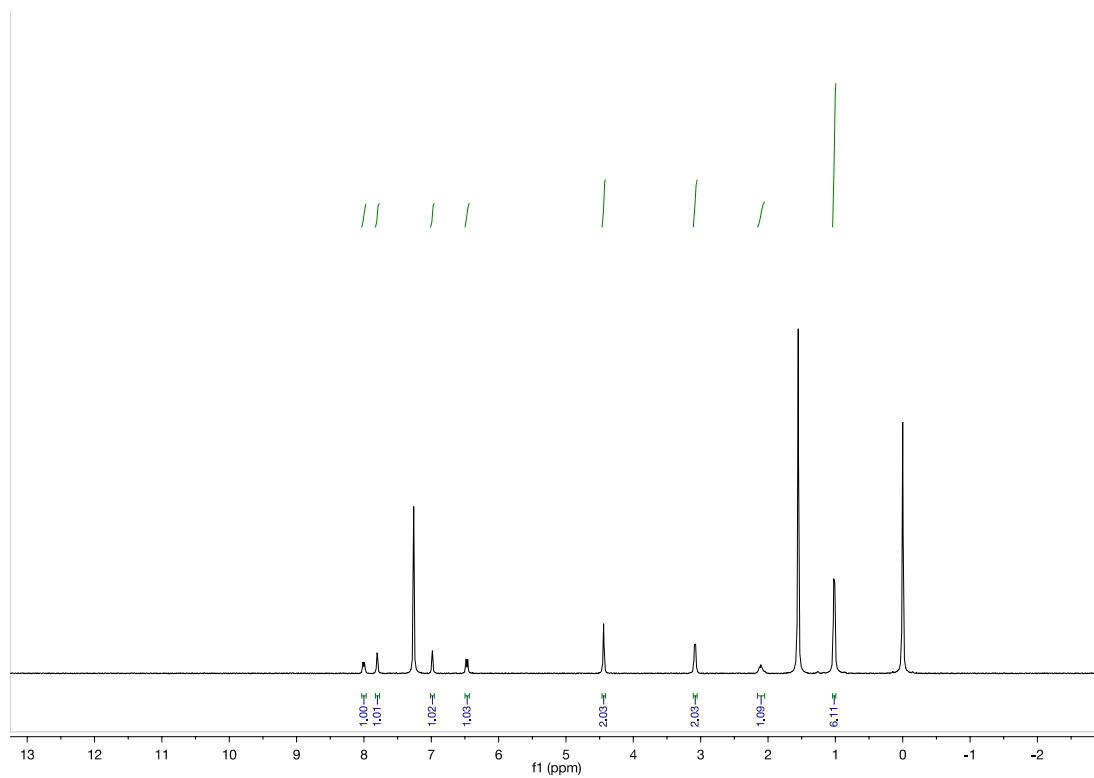

<sup>13</sup>C NMR for 1-Isobutyl-6-nitro-1,2-dihydroquinoline-3-carbonitrile (**10c**)

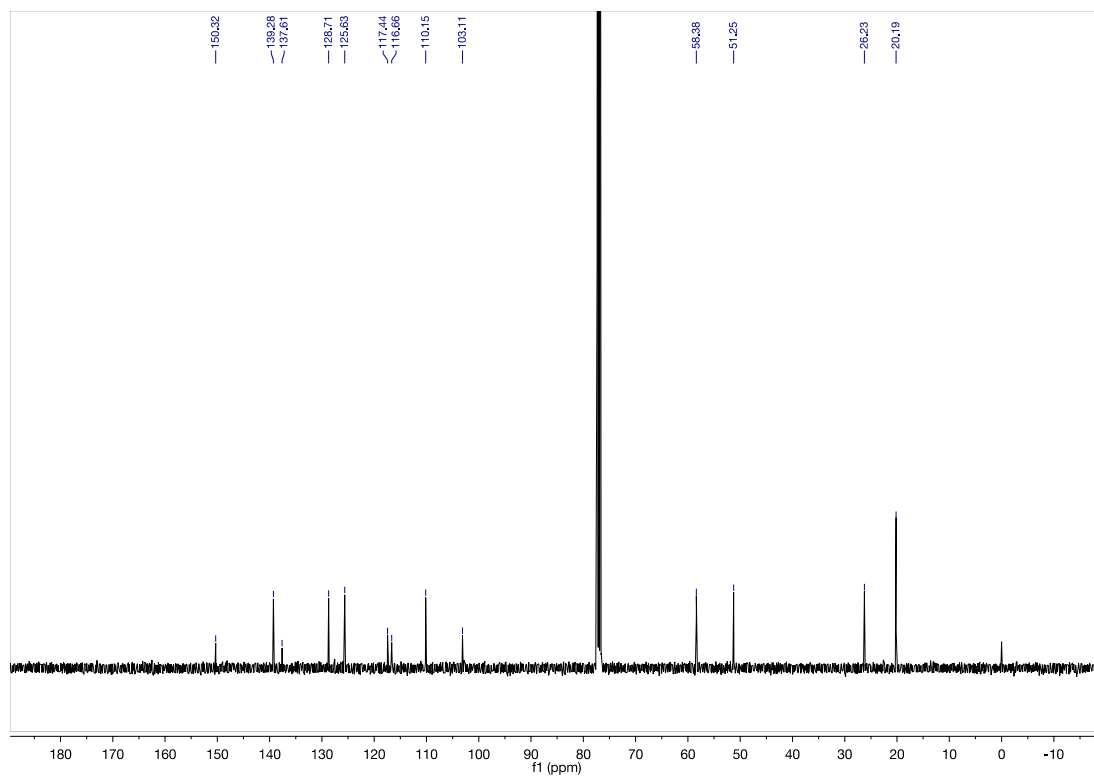

<sup>1</sup>H NMR for 1-Benzyl-6-nitro-1,2-dihydroquinoline-3-carbonitrile (**10d**)

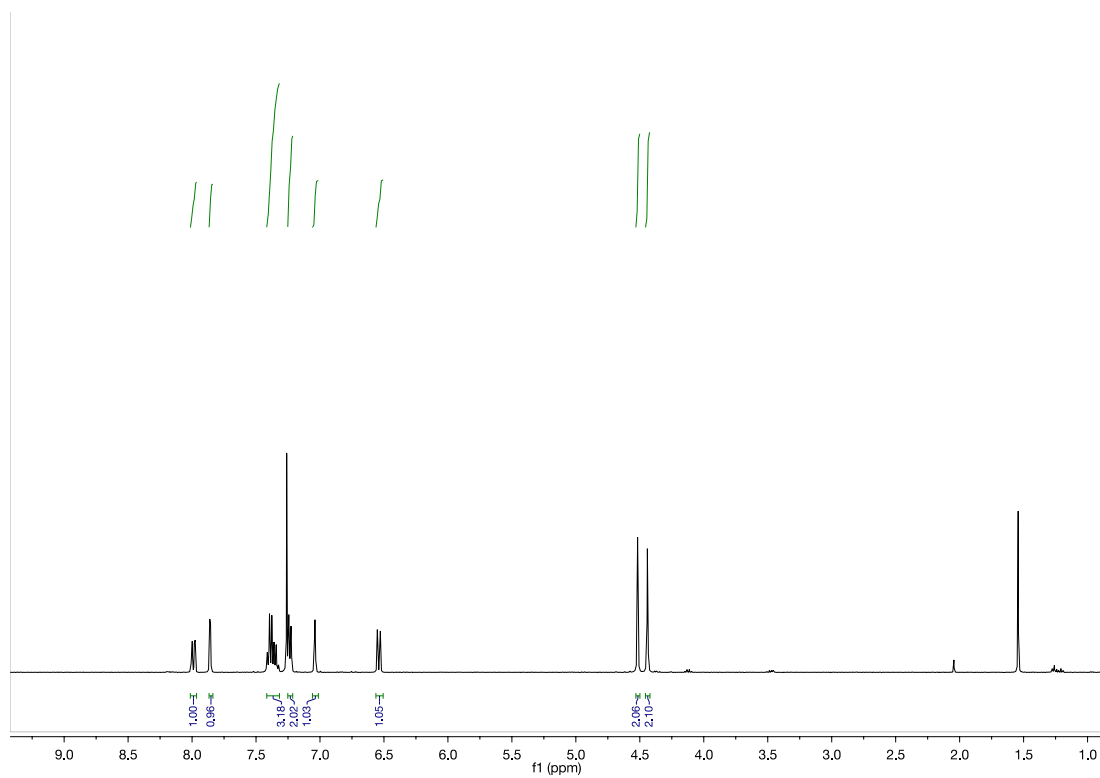

<sup>13</sup>C NMR for 1-Benzyl-6-nitro-1,2-dihydroquinoline-3-carbonitrile (**10d**)

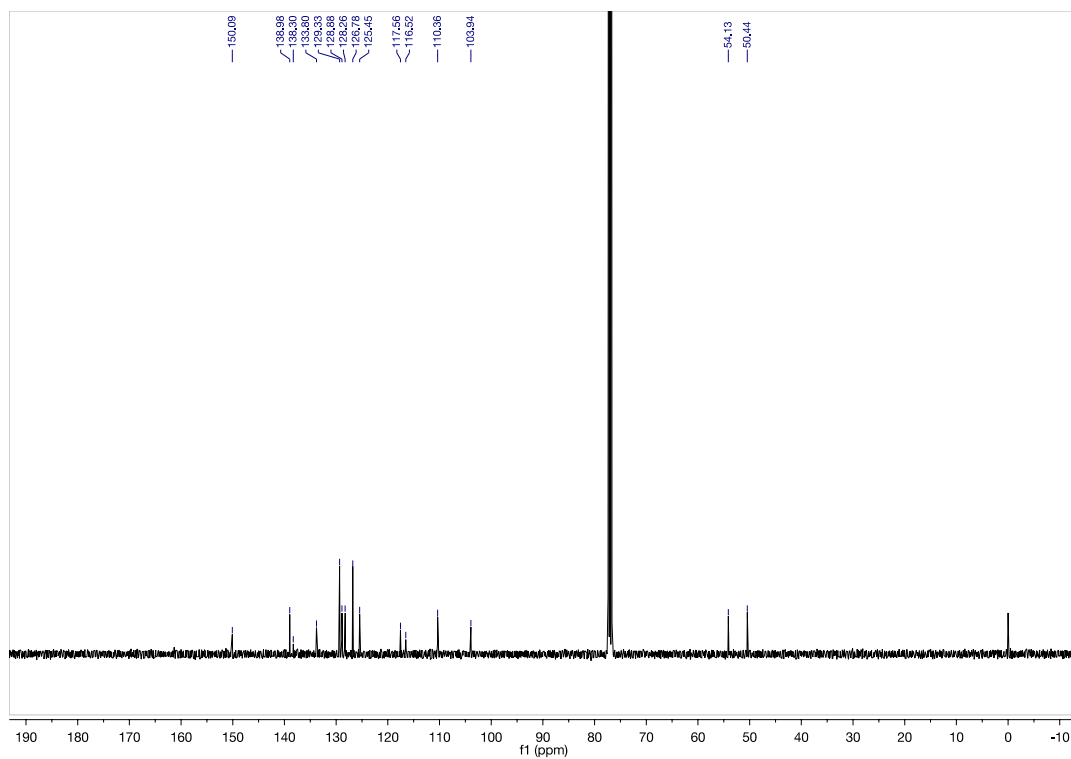

$^1\text{H}$  NMR for 6-Nitro-1-phenethyl-1,2-dihydroquinoline-3-carbonitrile (**10e**)

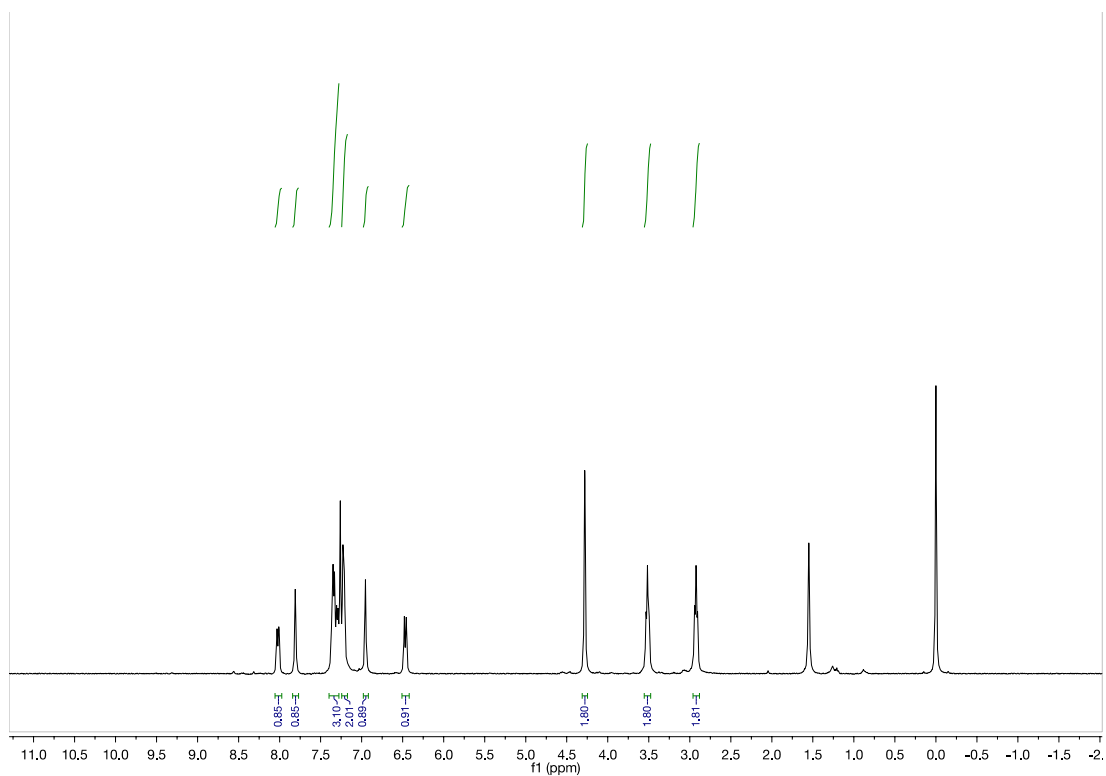

$^{13}\text{C}$  NMR for 6-Nitro-1-phenethyl-1,2-dihydroquinoline-3-carbonitrile (**10e**)

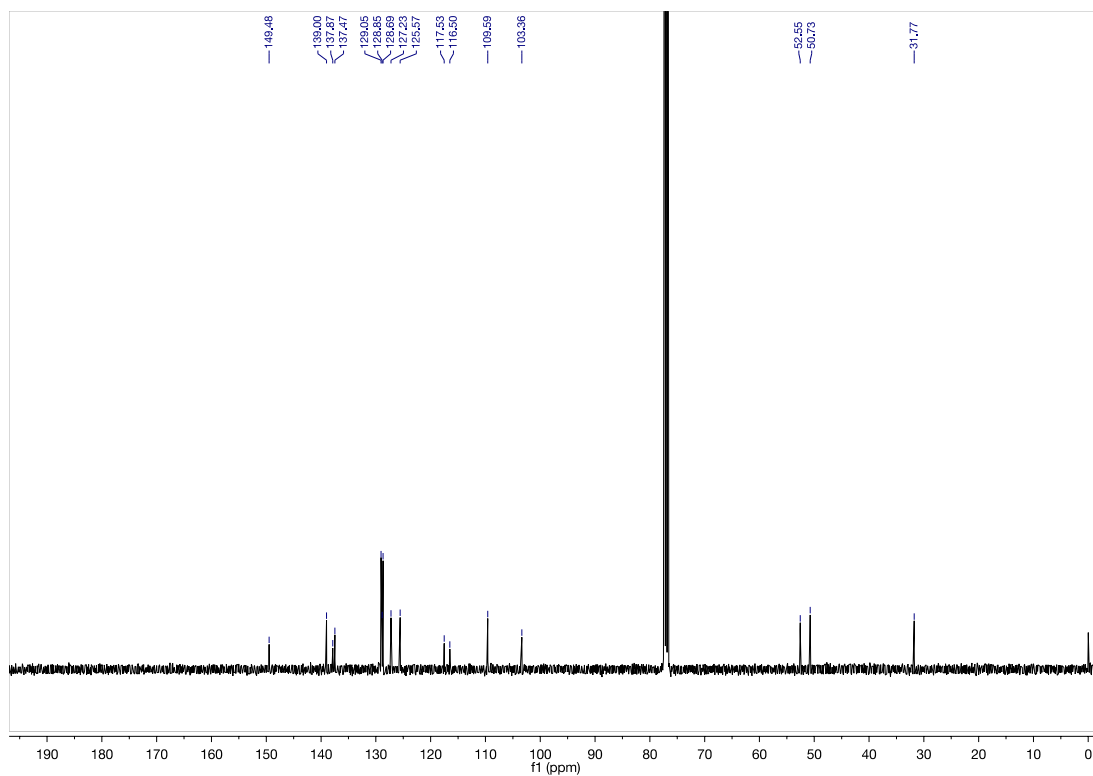



<sup>1</sup>H NMR for 6-Nitro-1-phenyl-1,2-dihydroquinoline-3-carbonitrile (**10f**)

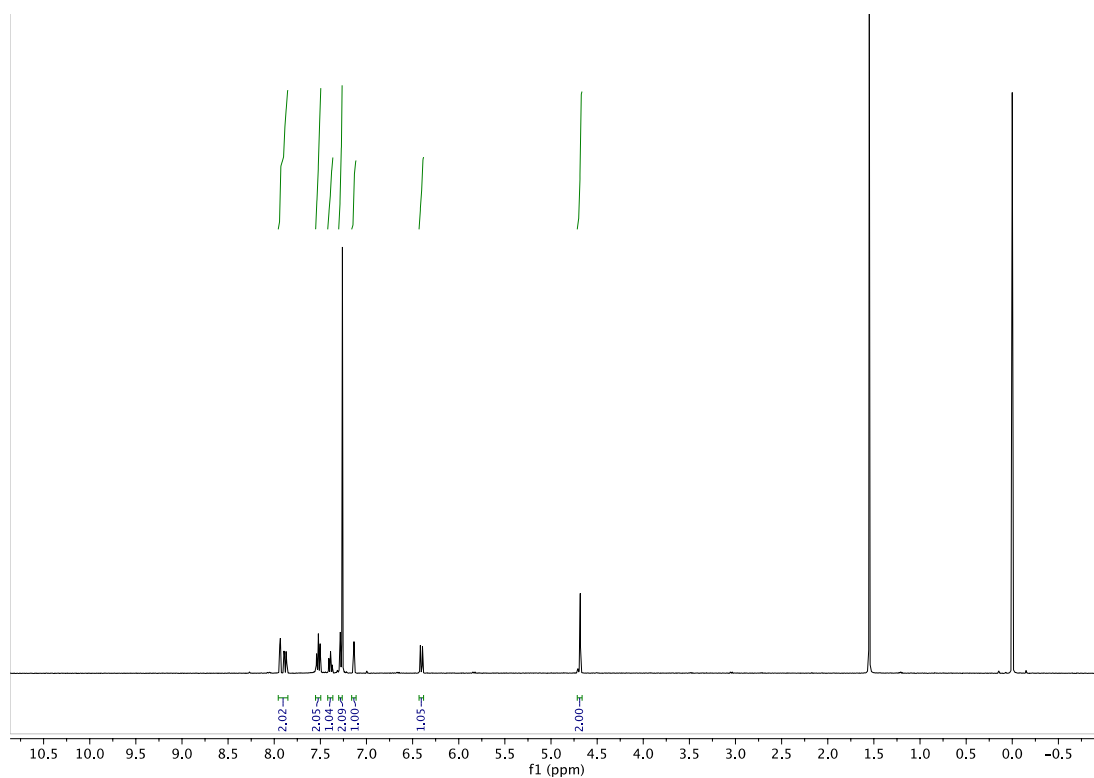

<sup>13</sup>C NMR for 6-Nitro-1-phenyl-1,2-dihydroquinoline-3-carbonitrile (**10f**)

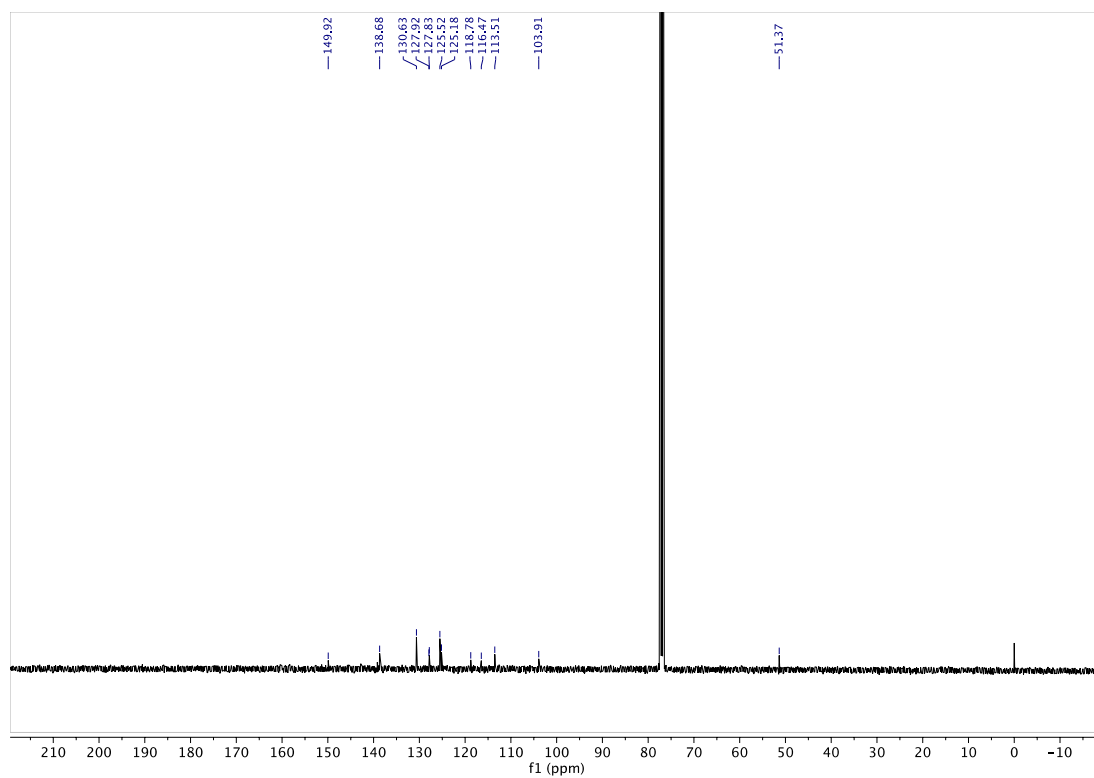

<sup>1</sup>H NMR for Ethyl 6-cyano-1-methyl-1,2-dihydroquinoline-3-carboxylate (**11a**)

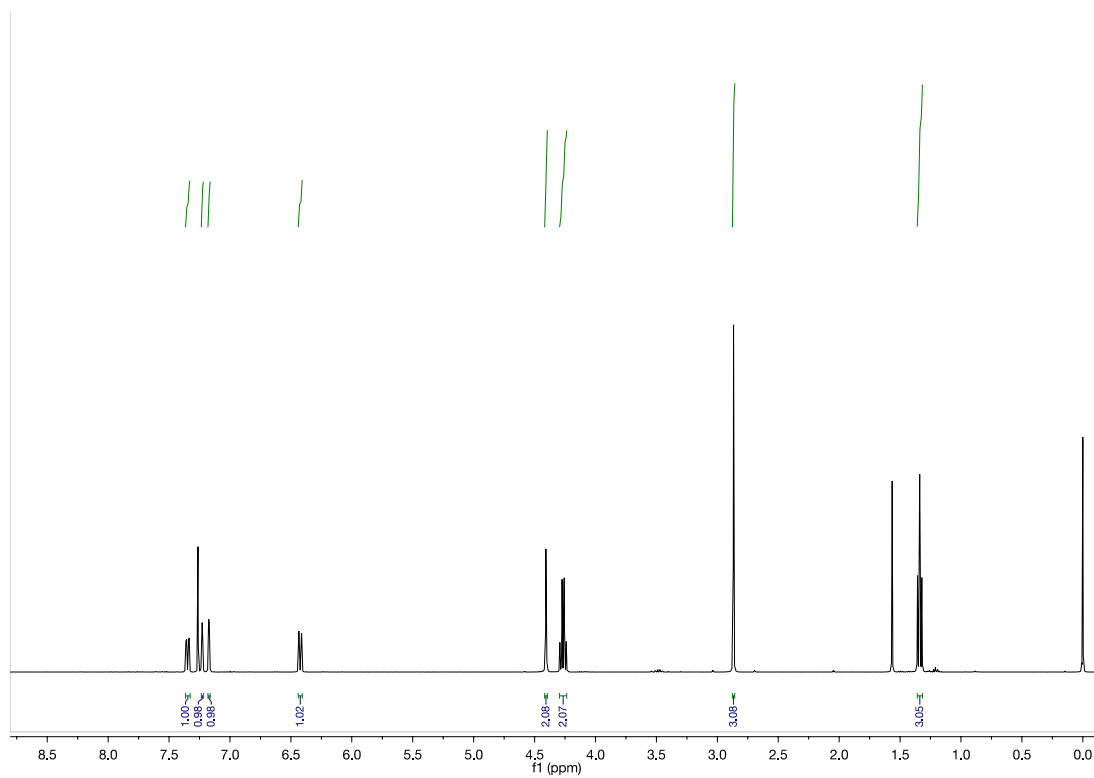

<sup>13</sup>C NMR for Ethyl 6-cyano-1-methyl-1,2-dihydroquinoline-3-carboxylate (**11a**)

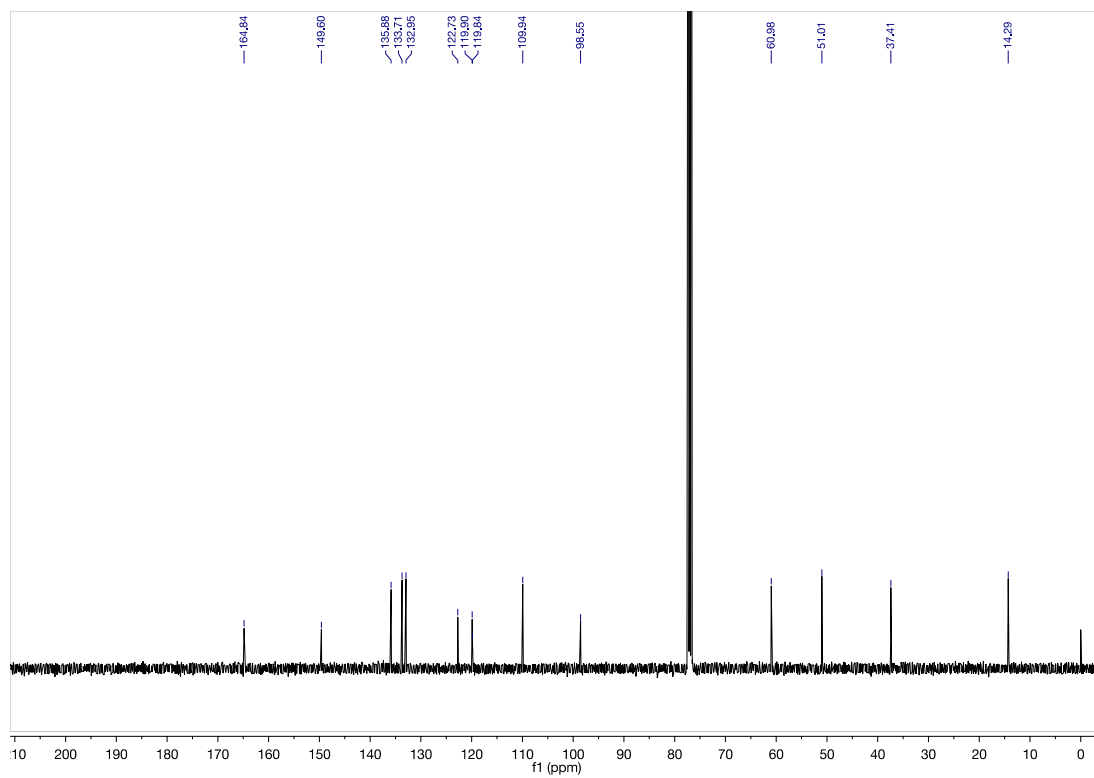

$^1\text{H}$  NMR for Ethyl 6-cyano-1-hexyl-1,2-dihydroquinoline-3-carboxylate (**11b**)

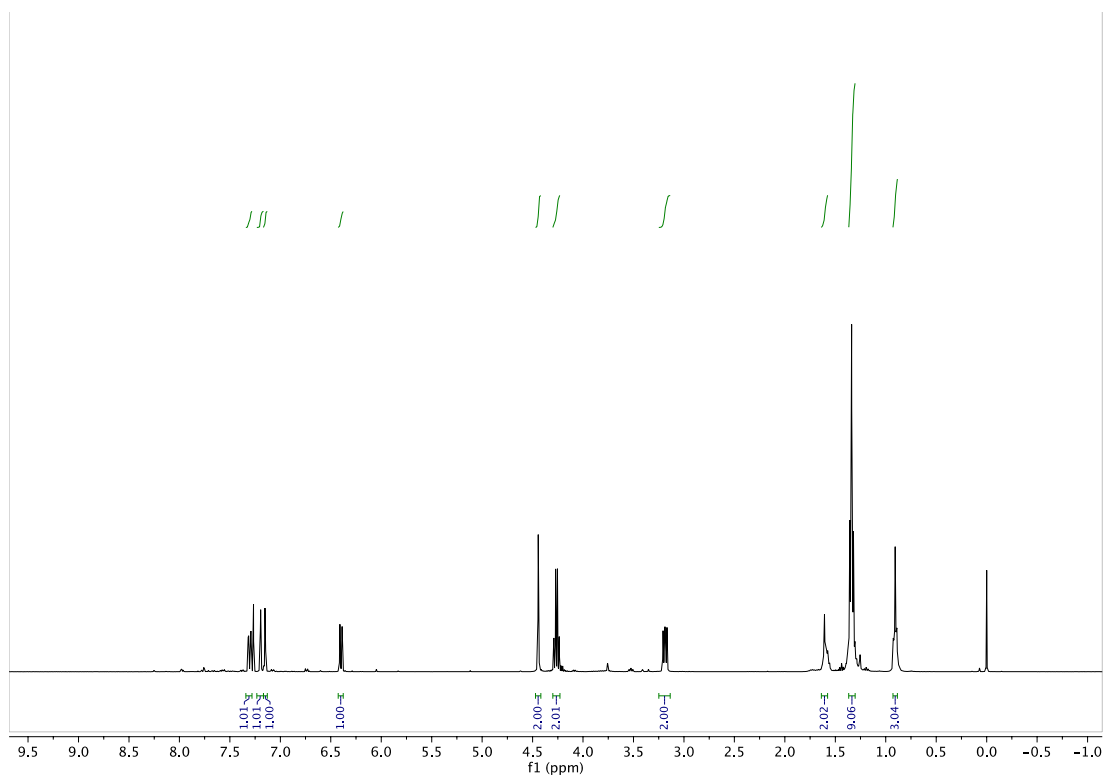

$^{13}\text{C}$  NMR for Ethyl 6-cyano-1-hexyl-1,2-dihydroquinoline-3-carboxylate (**11b**)

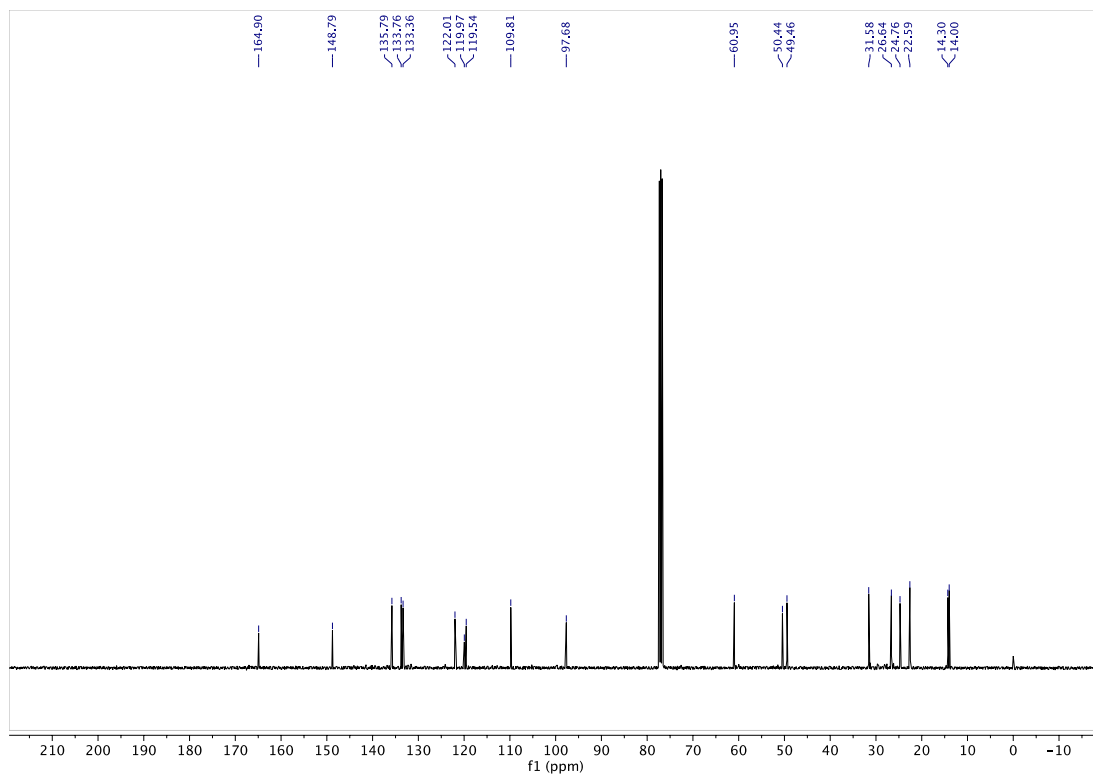

<sup>1</sup>H NMR for Ethyl 6-cyano-1-isobutyl-1,2-dihydroquinoline-3-carboxylate (**11c**)

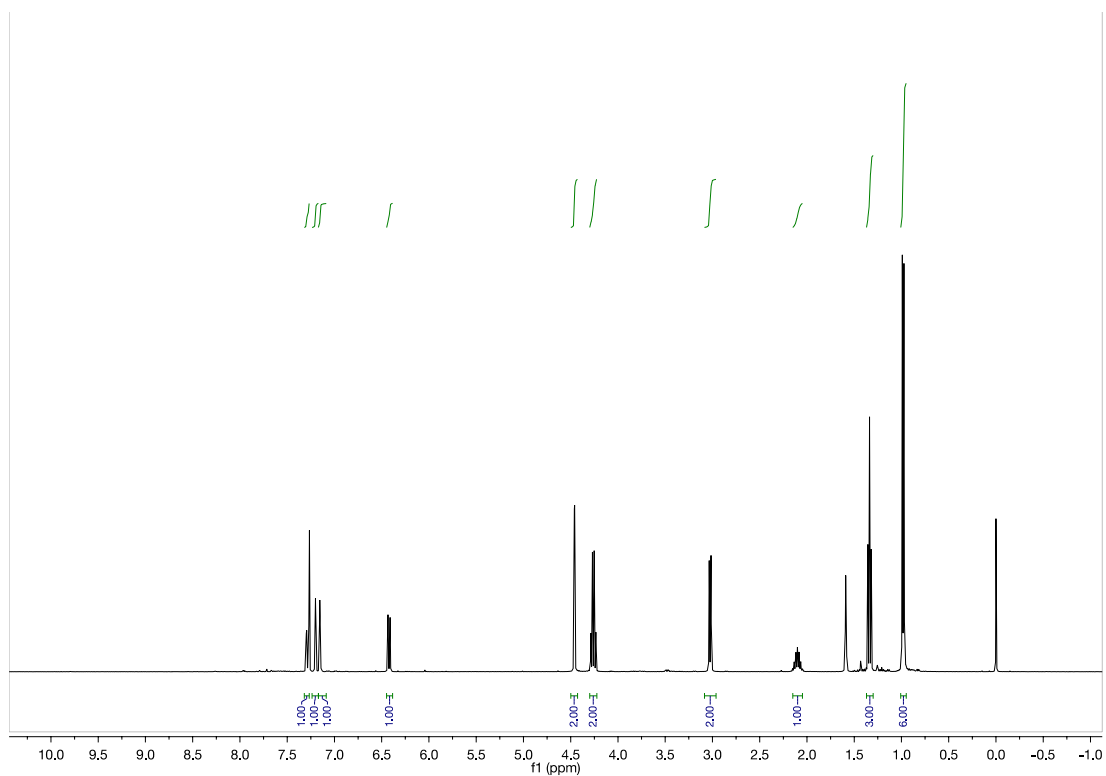

<sup>13</sup>C NMR for Ethyl 6-cyano-1-isobutyl-1,2-dihydroquinoline-3-carboxylate (**11c**)

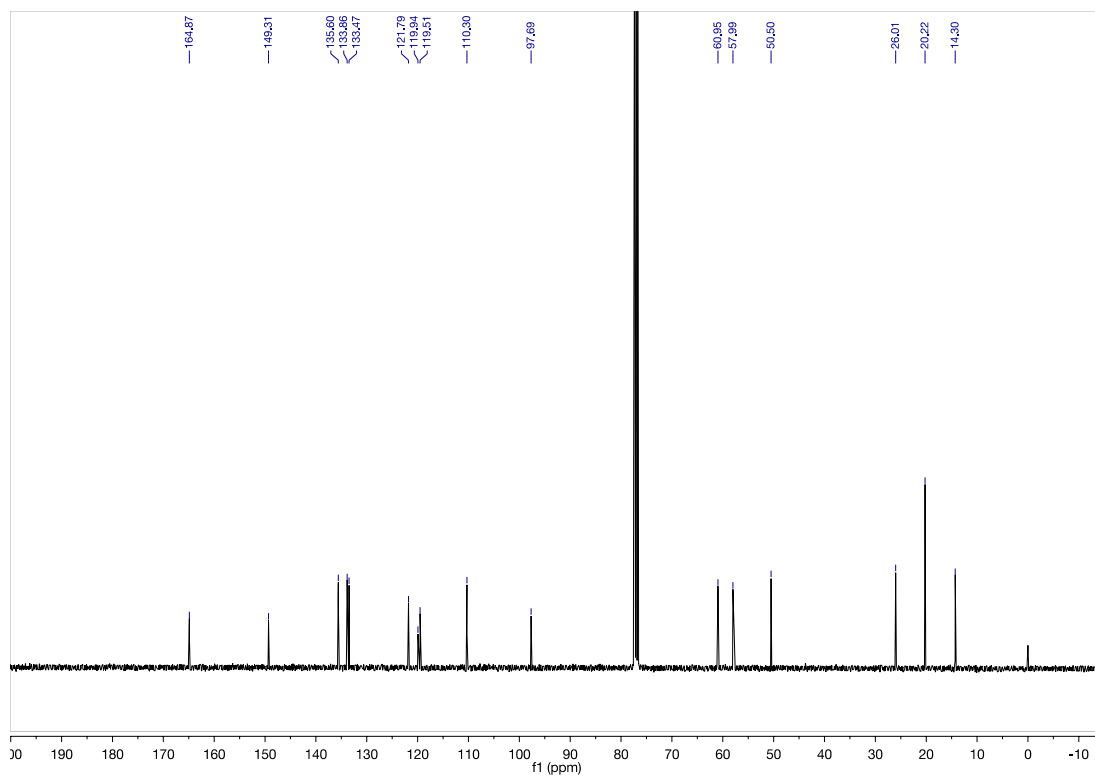

$^1\text{H}$  NMR for Ethyl 1-benzyl-6-cyano-1,2-dihydroquinoline-3-carboxylate (**11d**)

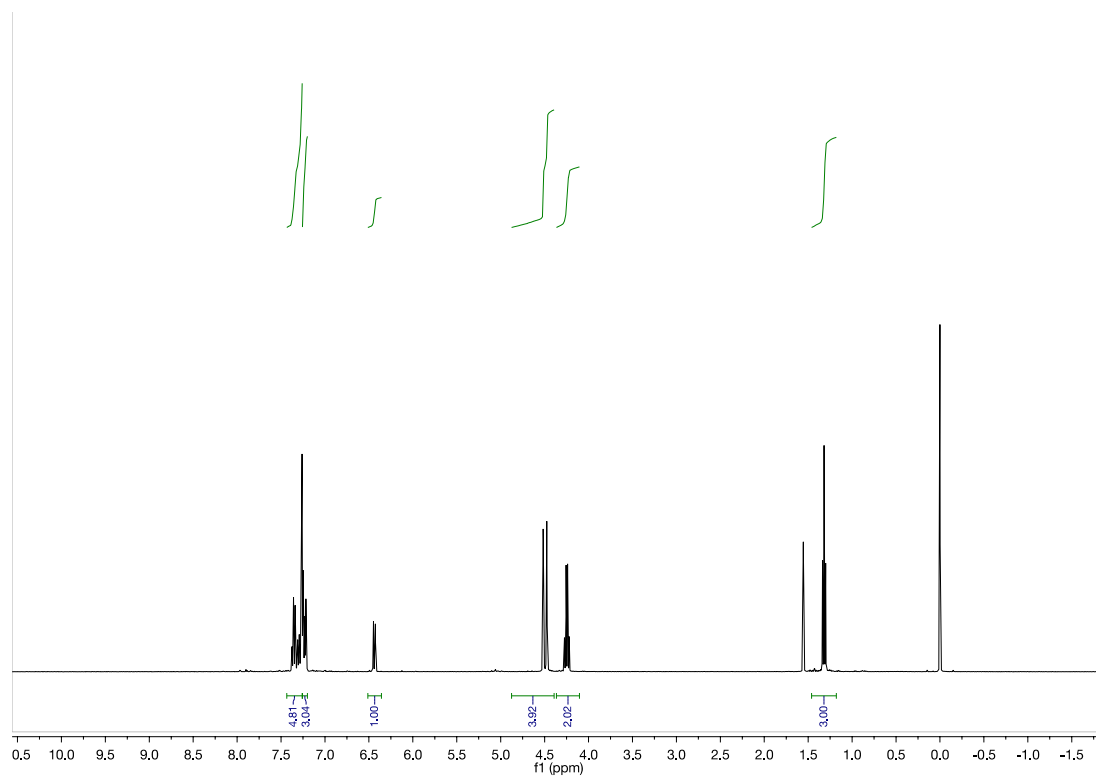

$^{13}\text{C}$  NMR for Ethyl 1-benzyl-6-cyano-1,2-dihydroquinoline-3-carboxylate (**11d**)

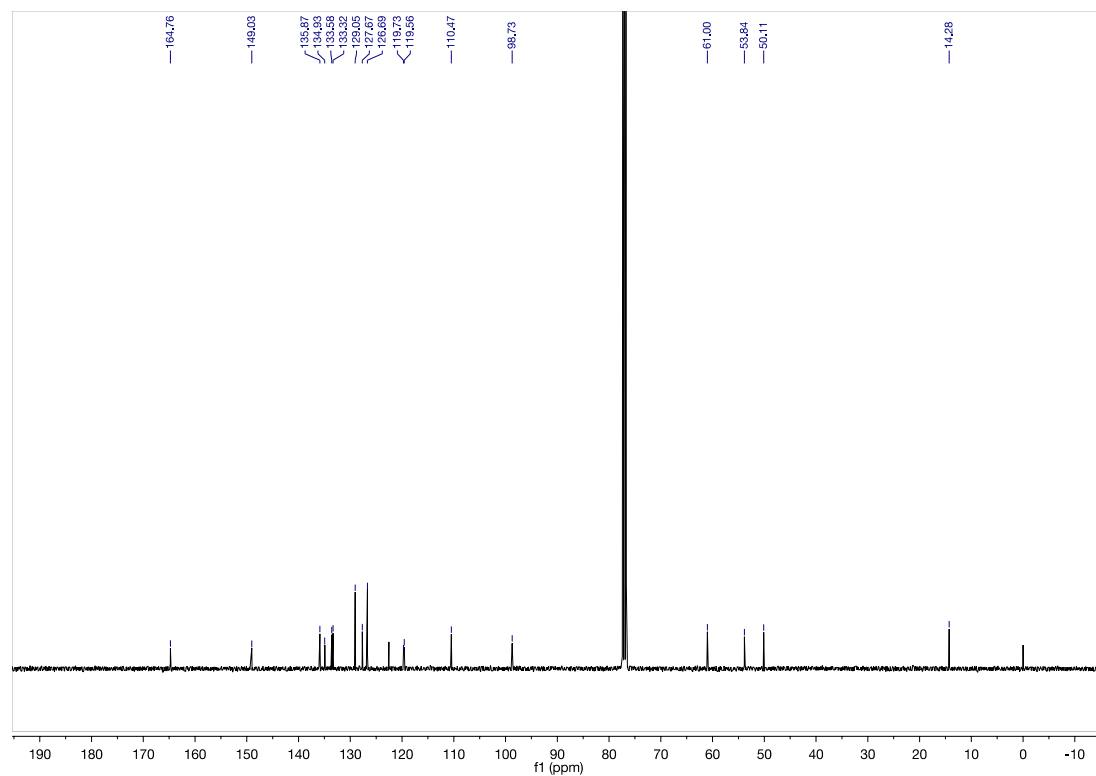

<sup>1</sup>H NMR for Ethyl 6-cyano-1-phenethyl-1,2-dihydroquinoline-3-carboxylate (**11e**)

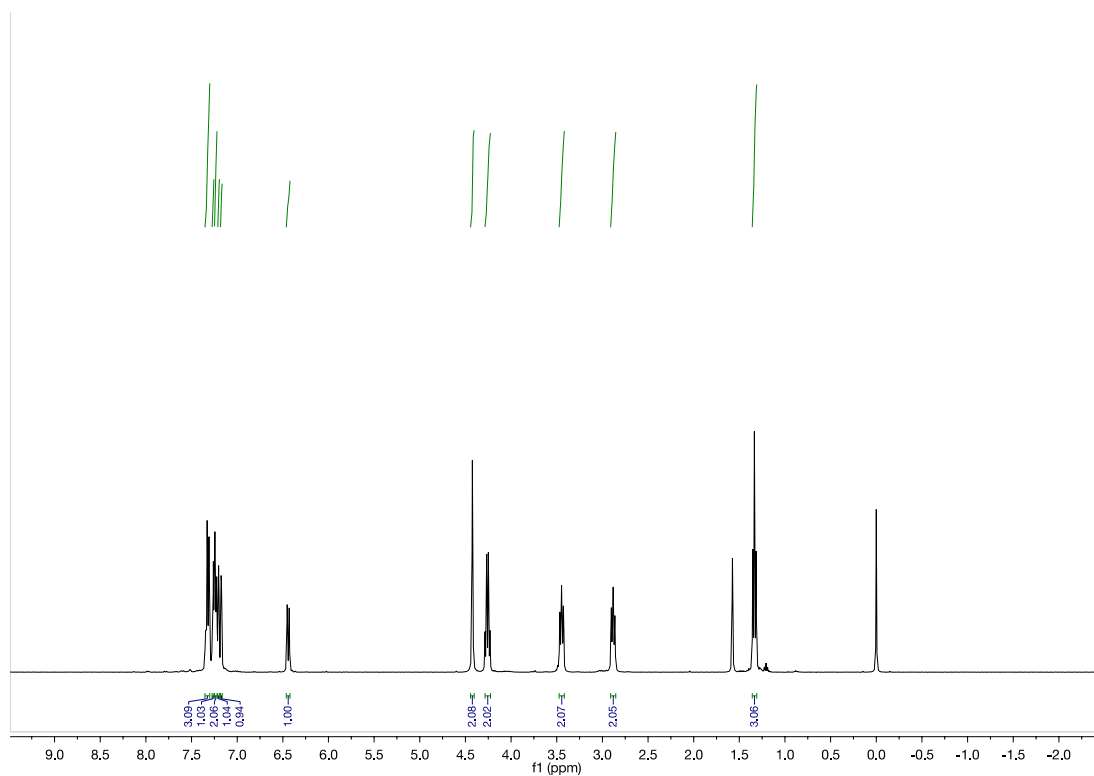

<sup>13</sup>C NMR for Ethyl 6-cyano-1-phenethyl-1,2-dihydroquinoline-3-carboxylate (**11e**)

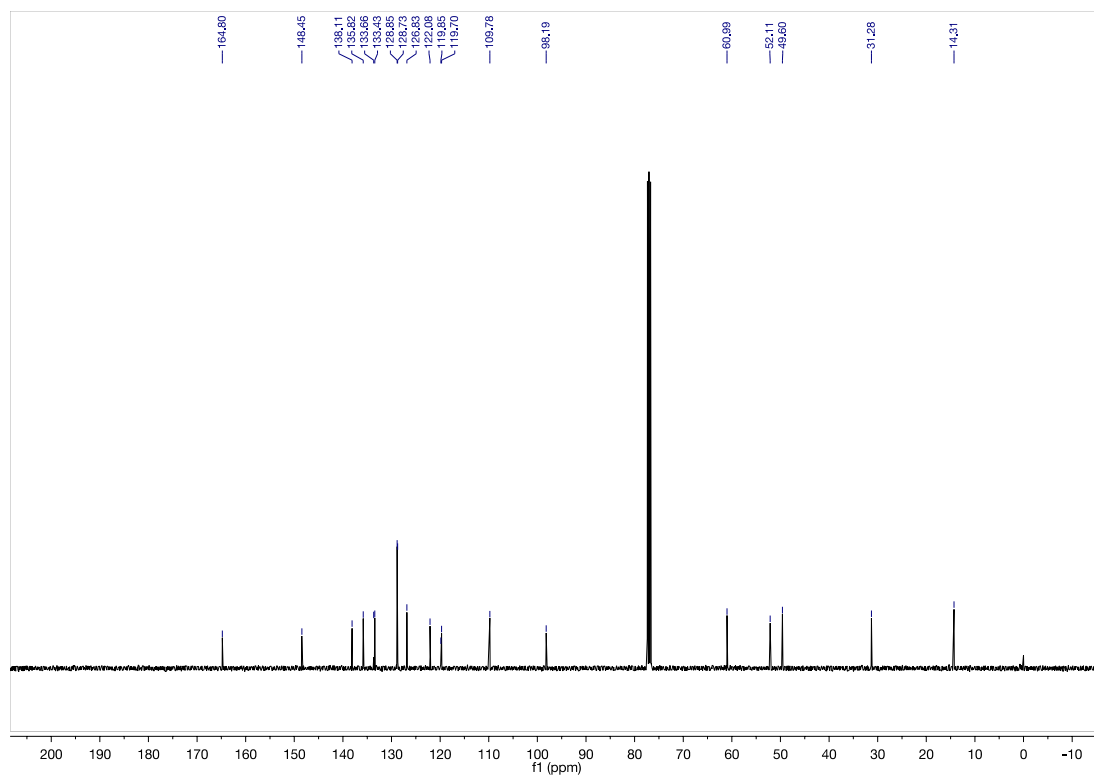

$^1\text{H}$  NMR for Ethyl 6-cyano-1-phenyl-1,2-dihydroquinoline-3-carboxylate (**11f**)

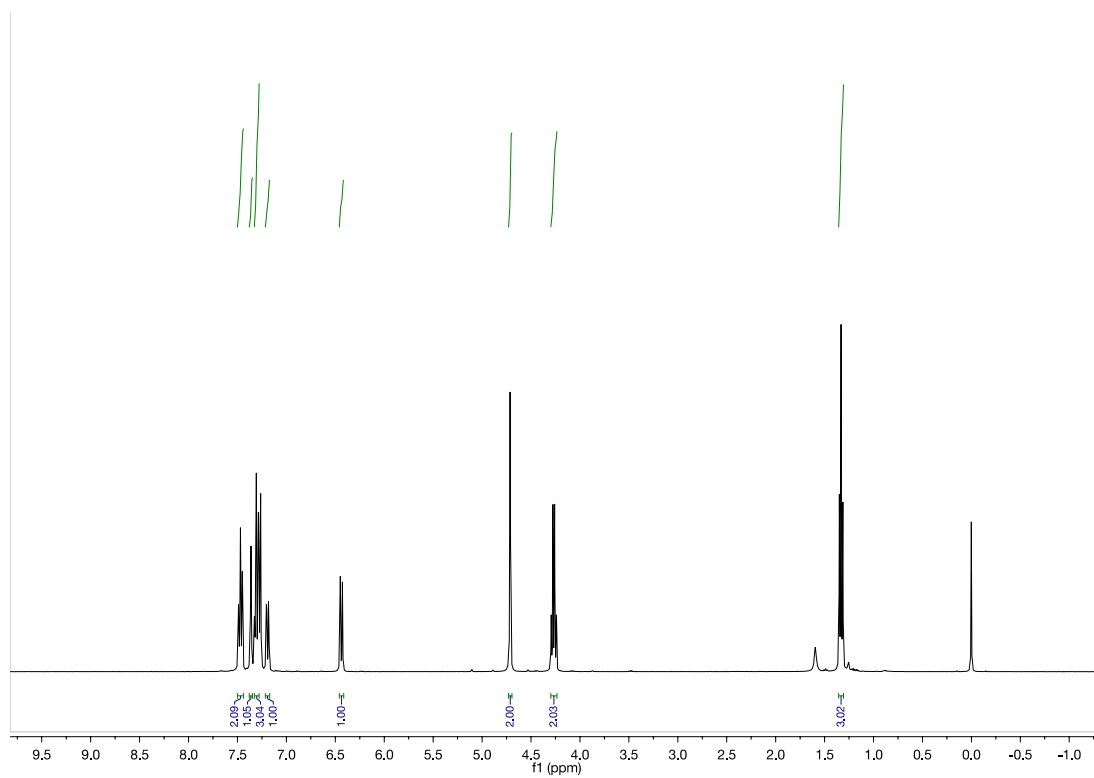

$^{13}\text{C}$  NMR for Ethyl 6-cyano-1-phenyl-1,2-dihydroquinoline-3-carboxylate (**11f**)

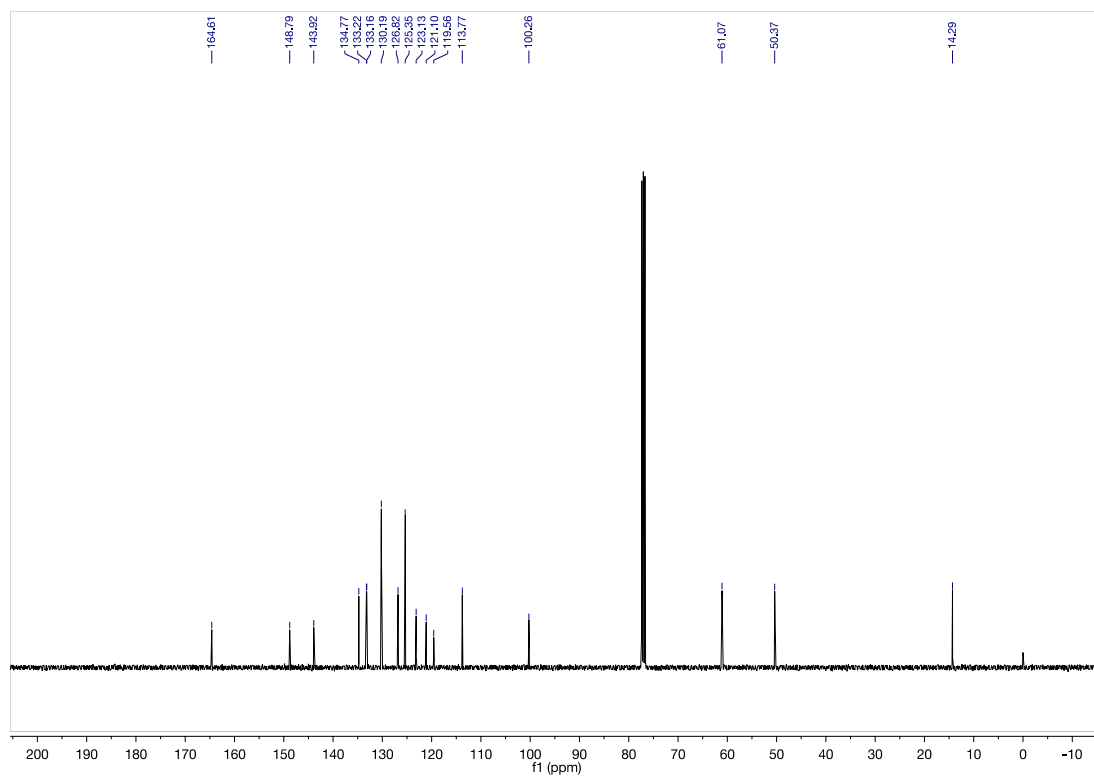

$^1\text{H}$  NMR for 1-Methyl-1,2-dihydroquinoline-3,6-dicarbonitrile (**12a**)

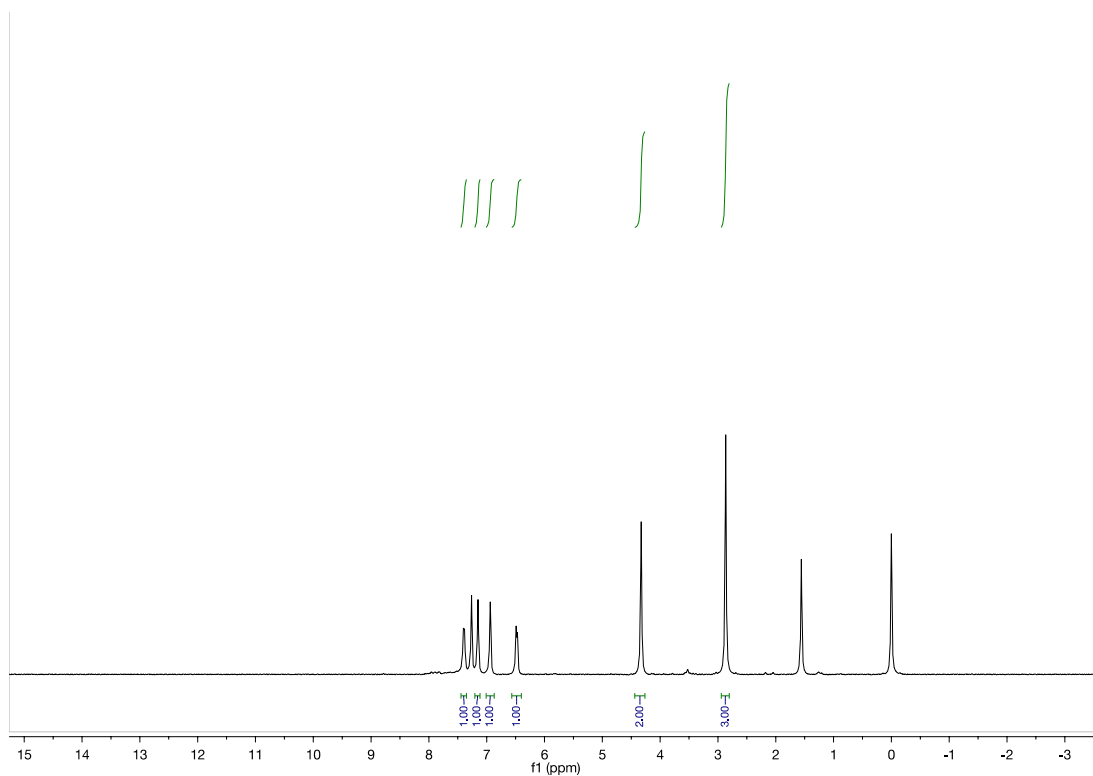

$^{13}\text{C}$  NMR for 1-Methyl-1,2-dihydroquinoline-3,6-dicarbonitrile (**12a**)

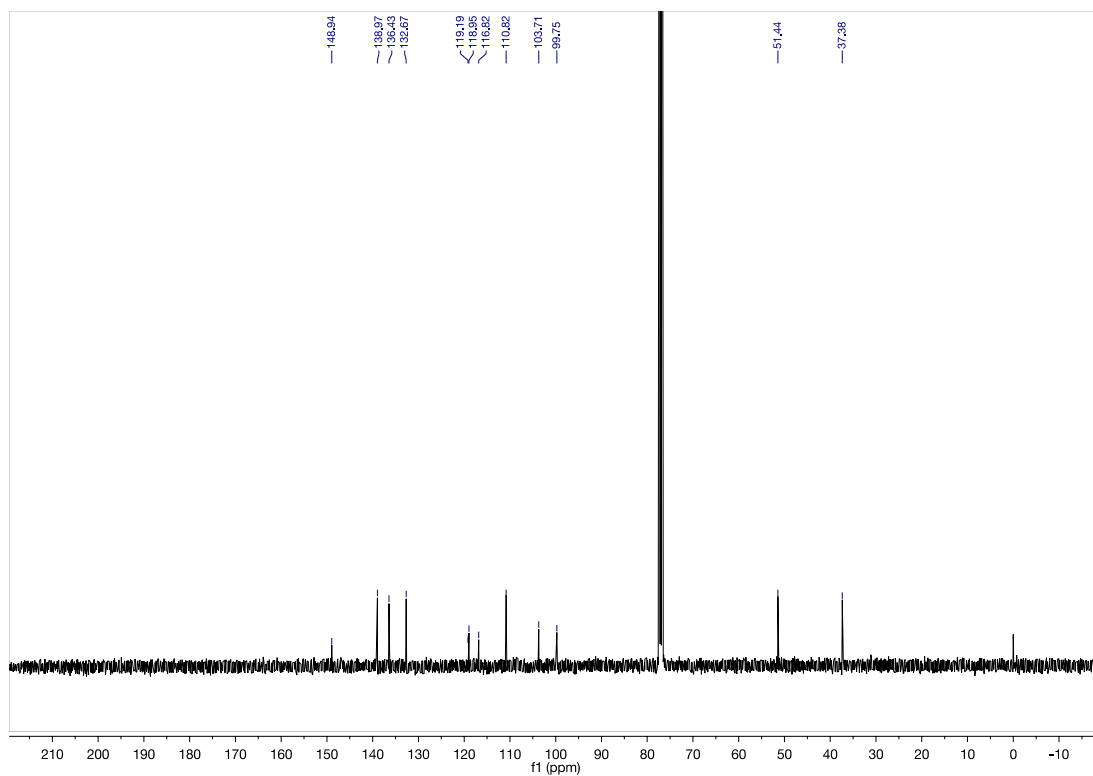



<sup>1</sup>H NMR for 1-Hexyl-1,2-dihydroquinoline-3,6-dicarbonitrile (**12b**)

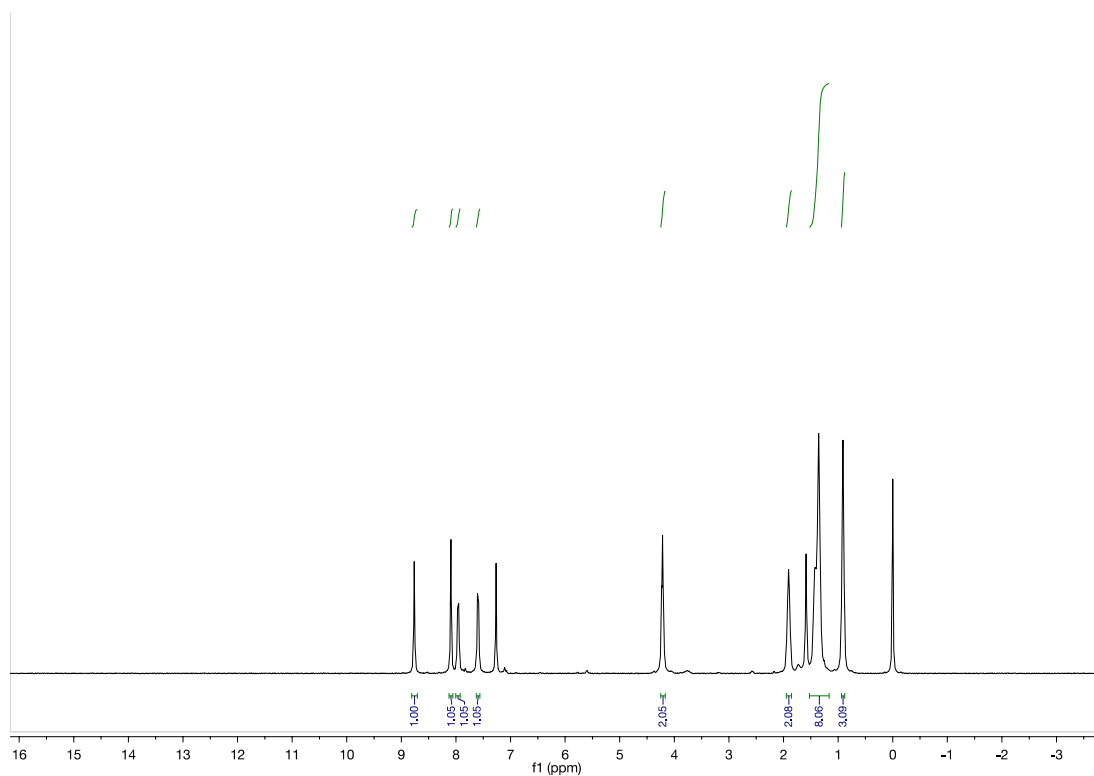

<sup>13</sup>C NMR for 1-Hexyl-1,2-dihydroquinoline-3,6-dicarbonitrile (**12b**)

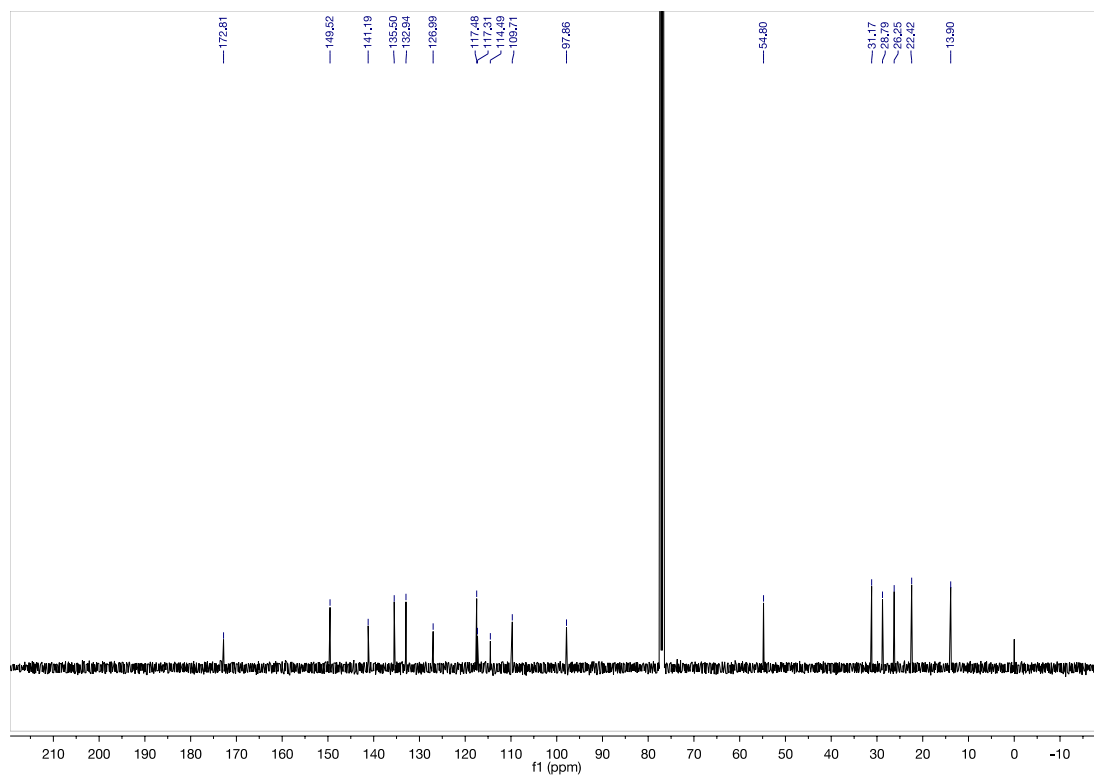

$^1\text{H}$  NMR for 1-Isobutyl-1,2-dihydroquinoline-3,6-dicarbonitrile (**12c**)

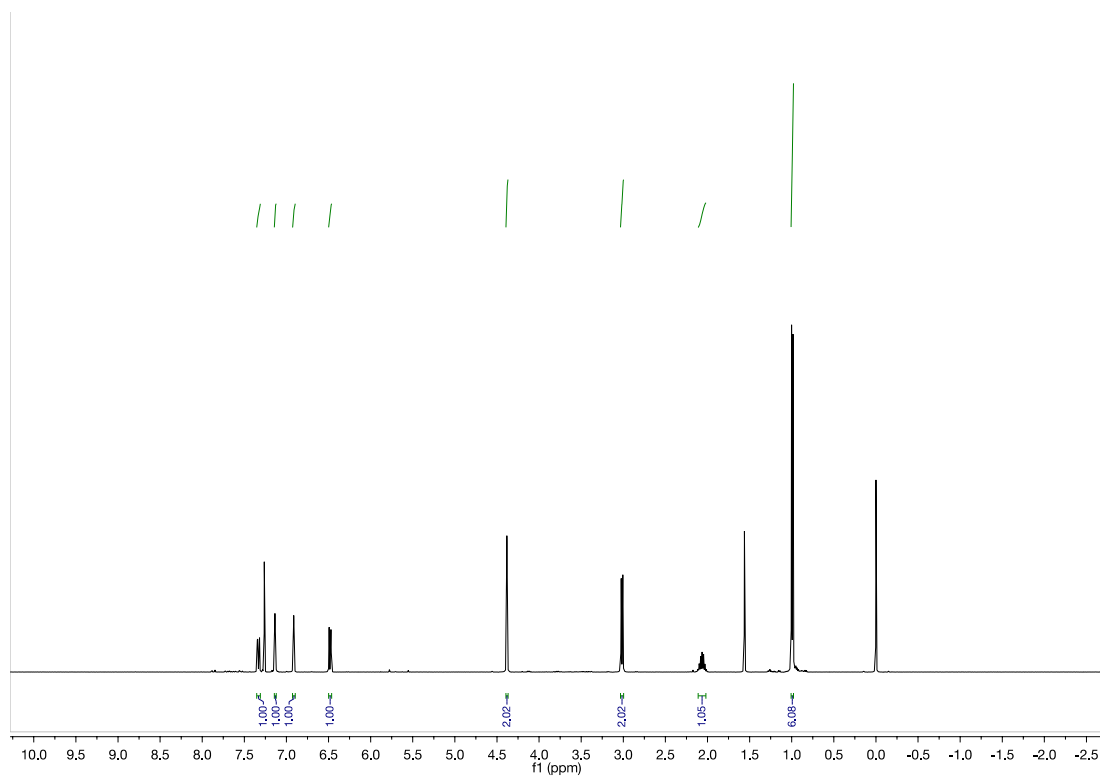

$^{13}\text{C}$  NMR for 1-Isobutyl-1,2-dihydroquinoline-3,6-dicarbonitrile (**12c**)

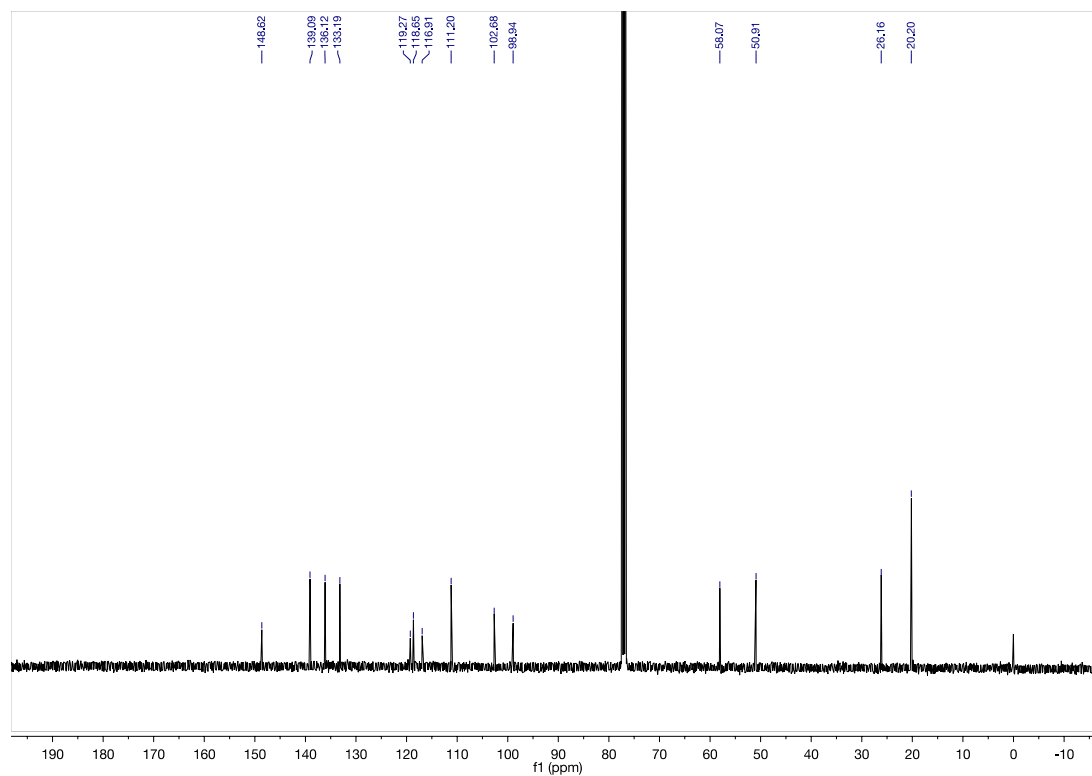

$^1\text{H}$  NMR for 1-Benzyl-1,2-dihydroquinoline-3,6-dicarbonitrile (**12d**)

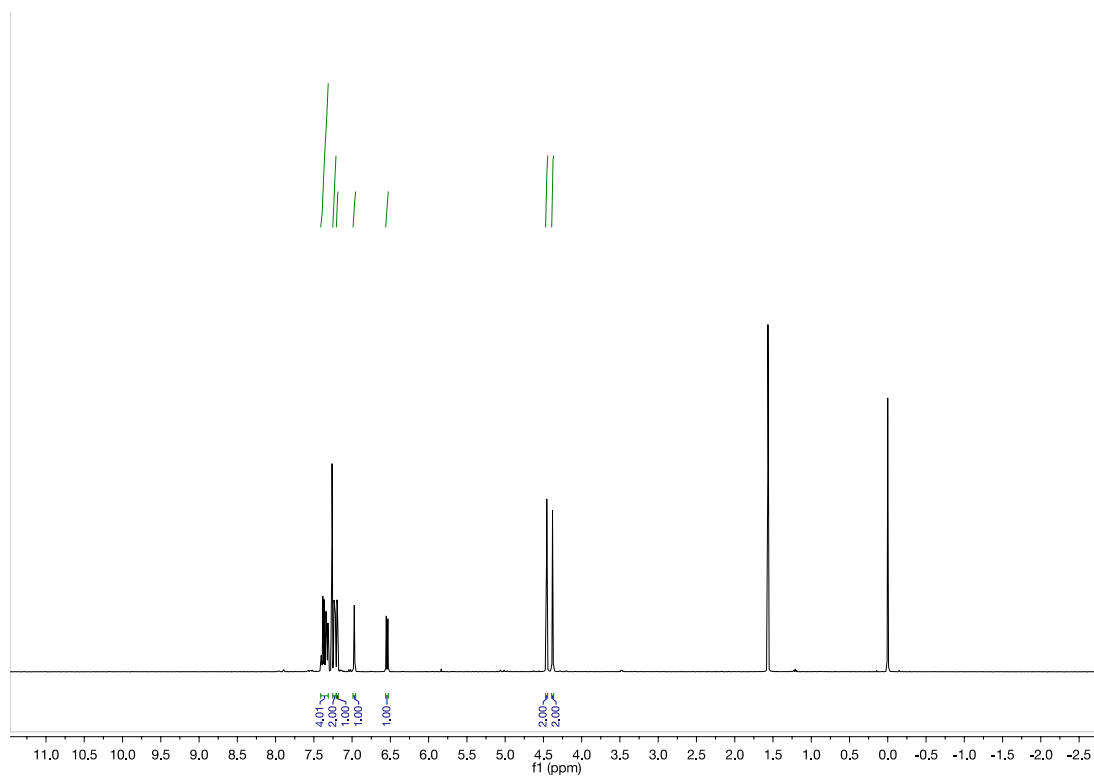

$^{13}\text{C}$  NMR for 1-Benzyl-1,2-dihydroquinoline-3,6-dicarbonitrile (**12d**)

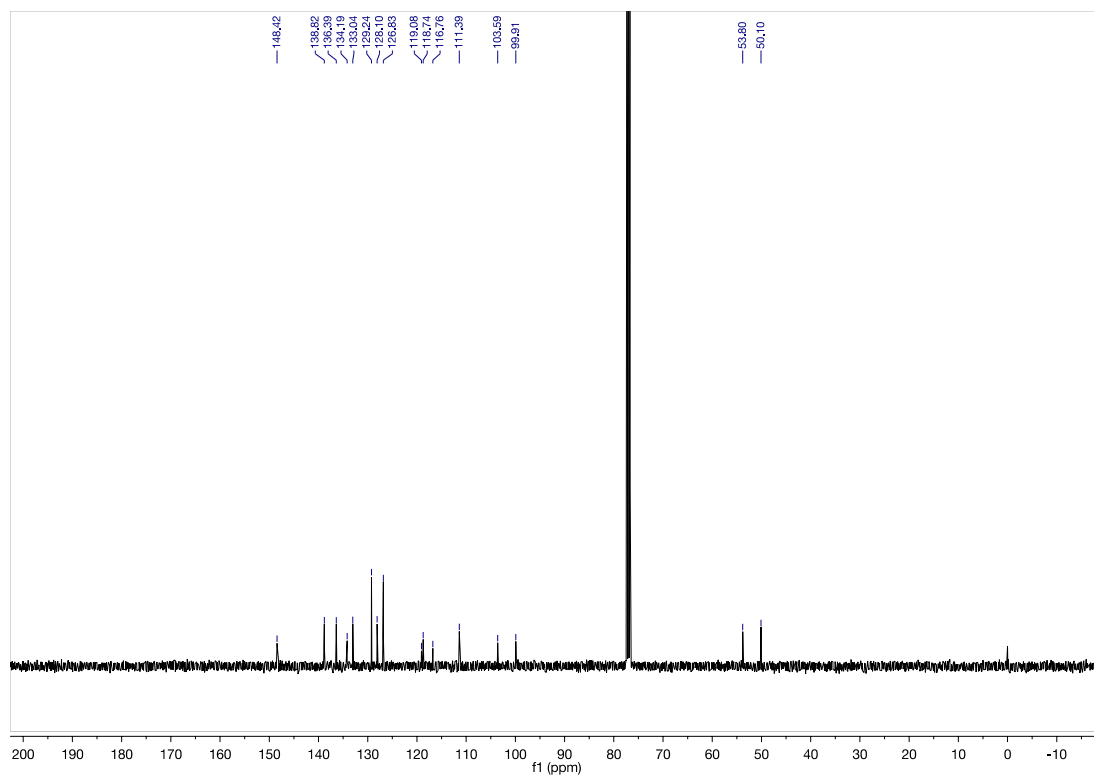

$^1\text{H}$  NMR for 1-Phenethyl-1,2-dihydroquinoline-3,6-dicarbonitrile (**12e**)

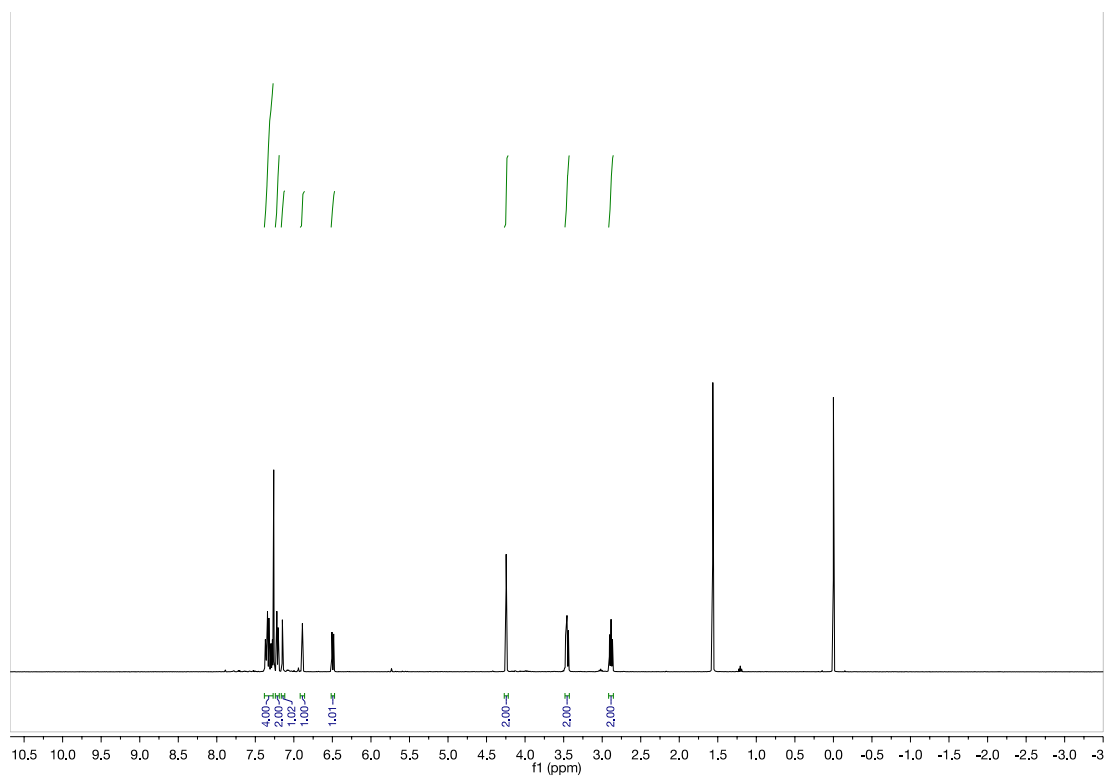

$^{13}\text{C}$  NMR for 1-Phenethyl-1,2-dihydroquinoline-3,6-dicarbonitrile (**12e**)

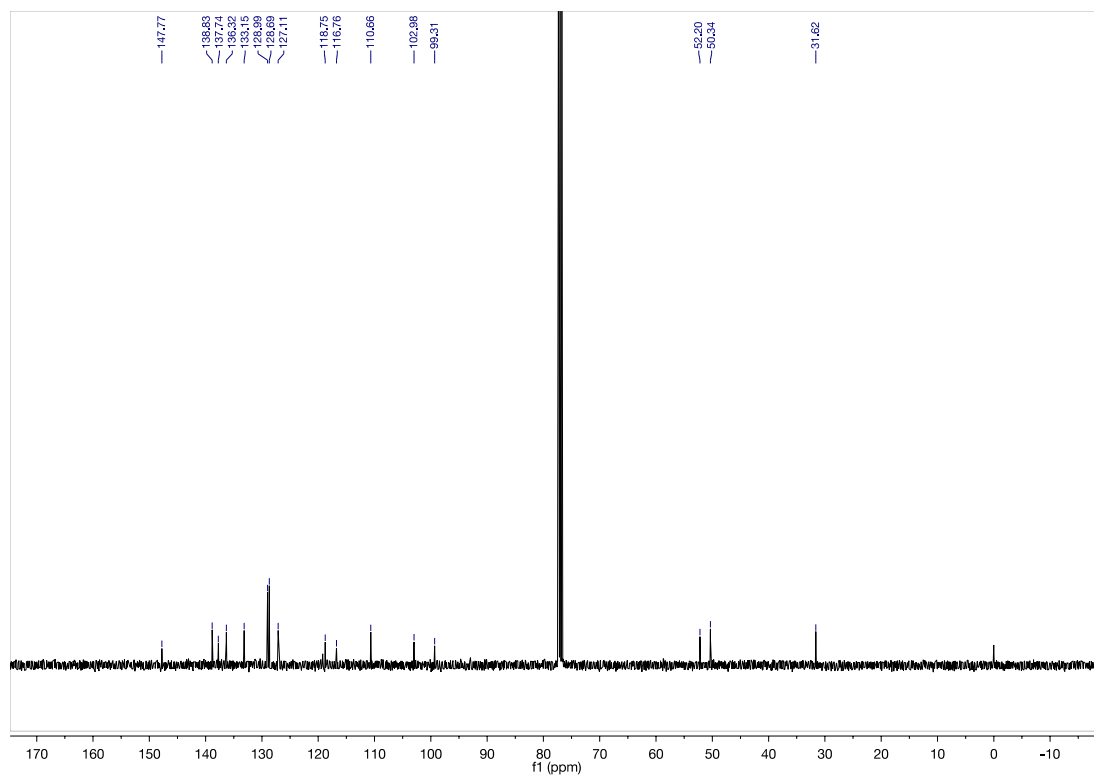

$^1\text{H}$  NMR for Ethyl 1-methyl-1,2-dihydro-1,8-naphthyridine-3-carboxylate (**13a**)

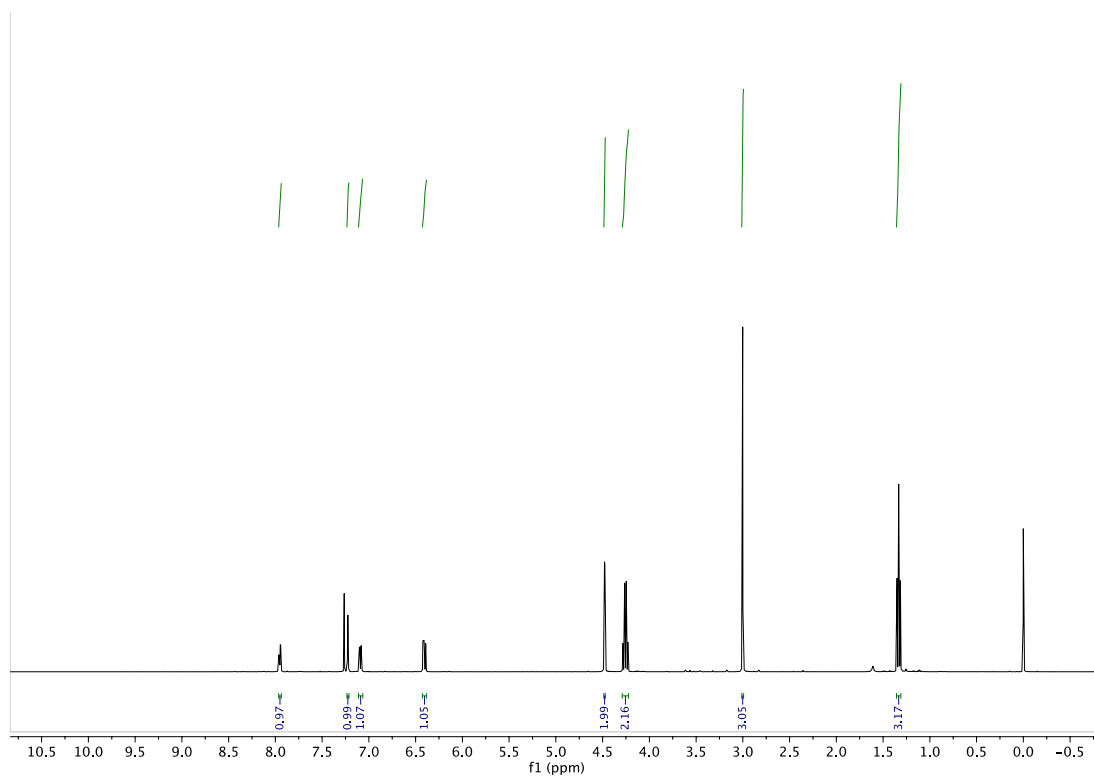

$^{13}\text{C}$  NMR for Ethyl 1-methyl-1,2-dihydro-1,8-naphthyridine-3-carboxylate (**13a**)

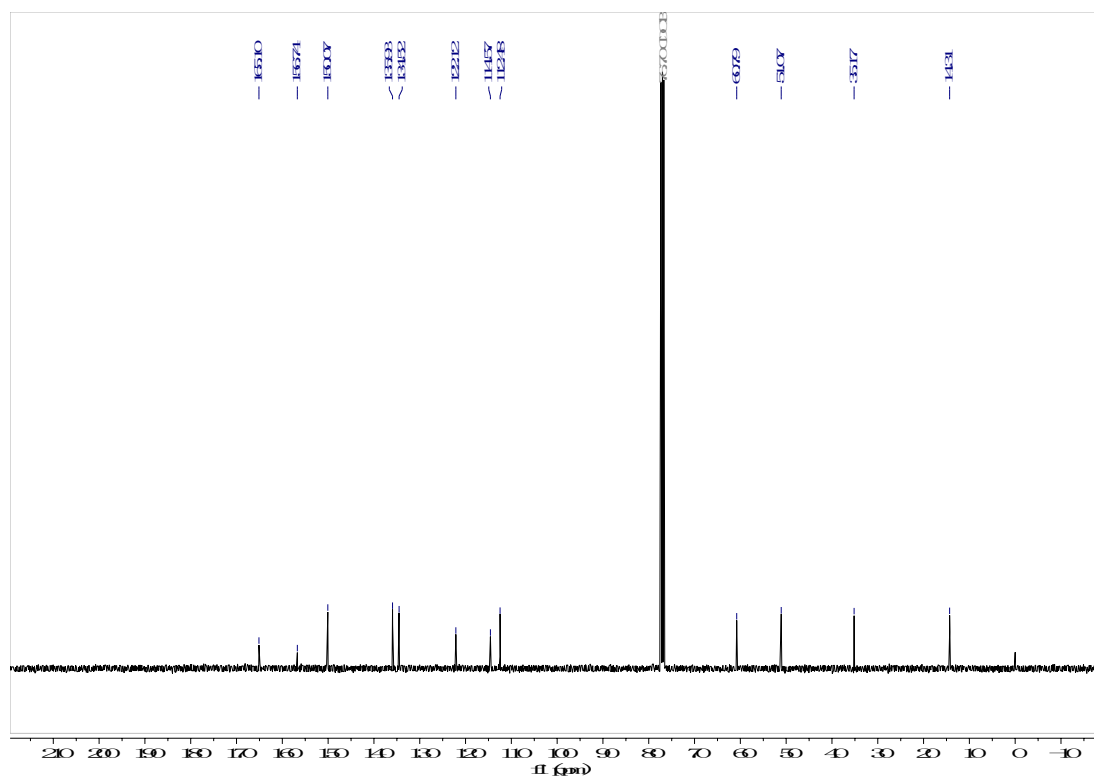

<sup>1</sup>H NMR for Ethyl 1-hexyl-1,2-dihydro-1,8-naphthyridine-3-carboxylate (**13b**)

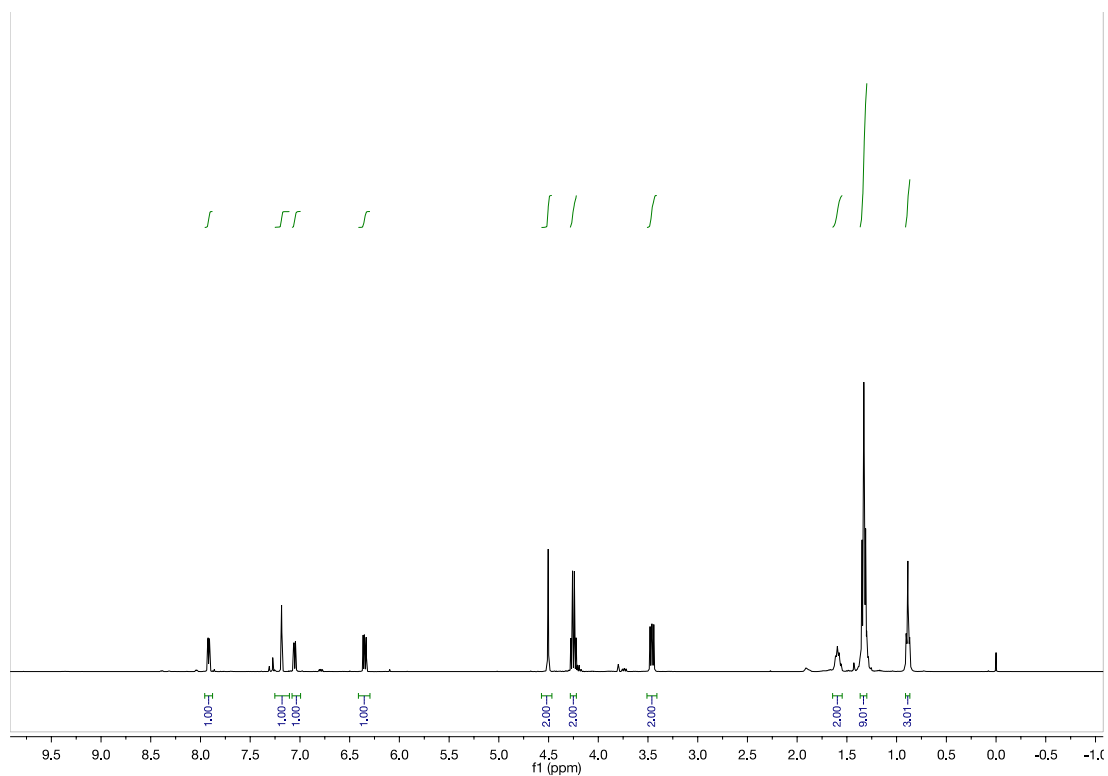

<sup>13</sup>C NMR for Ethyl 1-hexyl-1,2-dihydro-1,8-naphthyridine-3-carboxylate (**13b**)

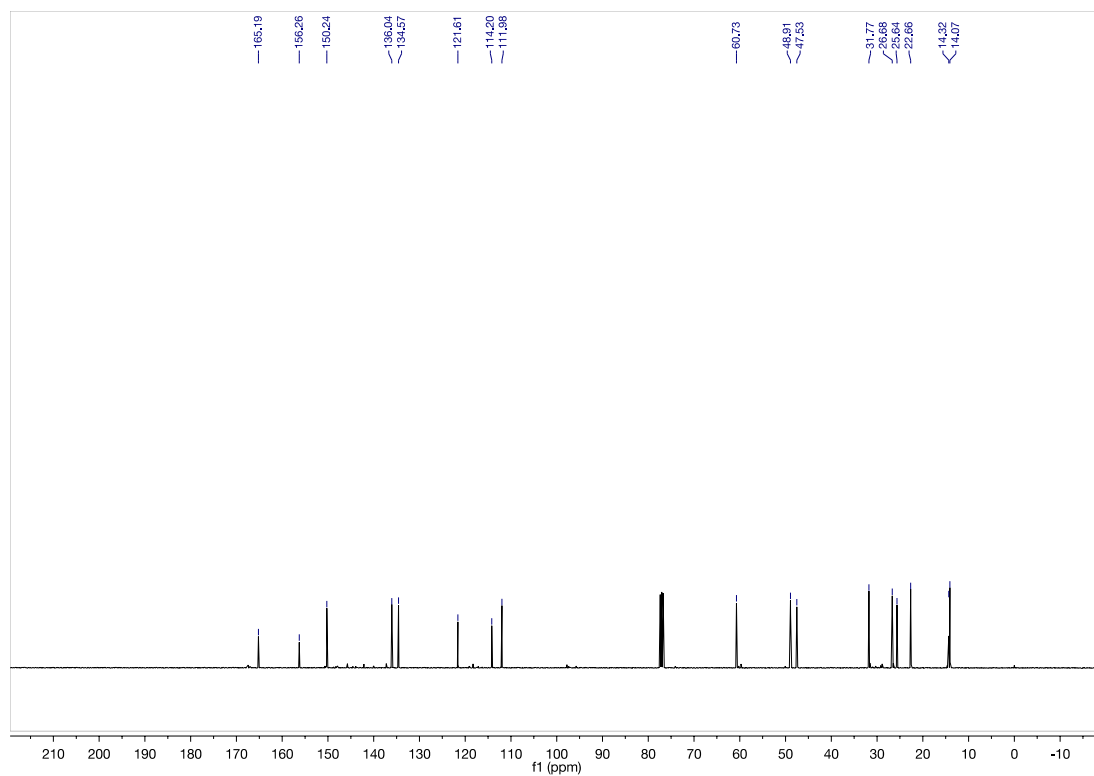

$^1\text{H}$  NMR for Ethyl 1-isobutyl-1,2-dihydro-1,8-naphthyridine-3-carboxylate (**13c**)

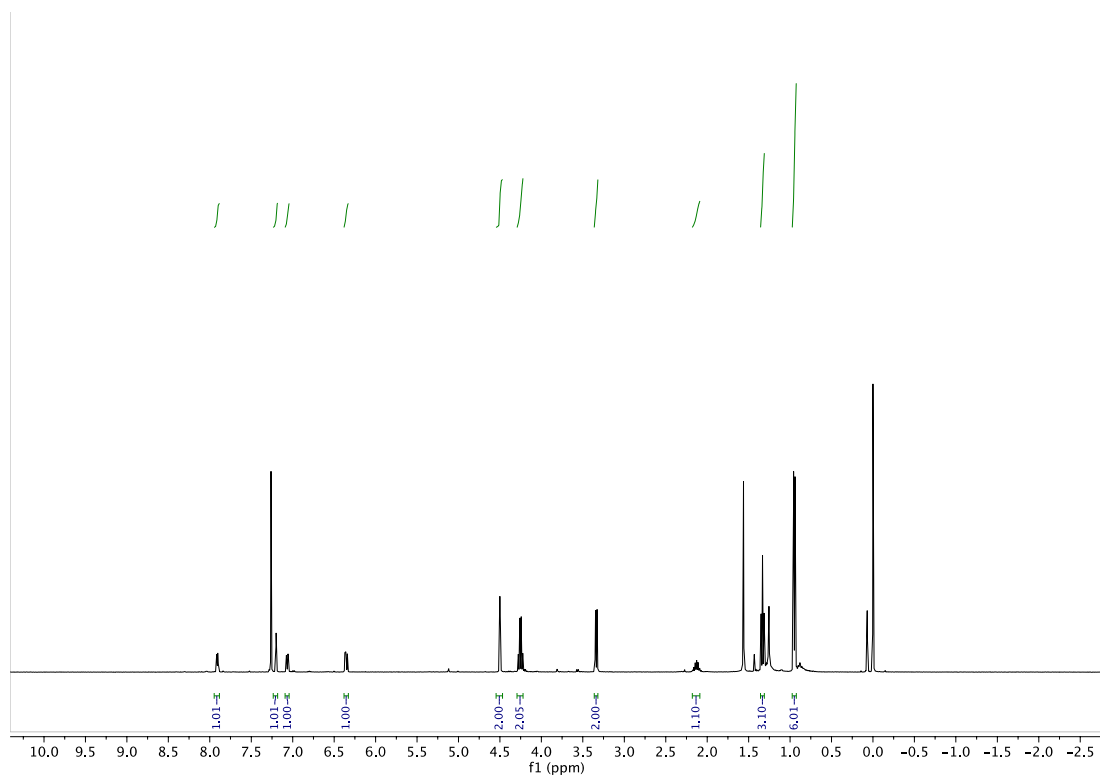

$^{13}\text{C}$  NMR for Ethyl 1-isobutyl-1,2-dihydro-1,8-naphthyridine-3-carboxylate (**13c**)

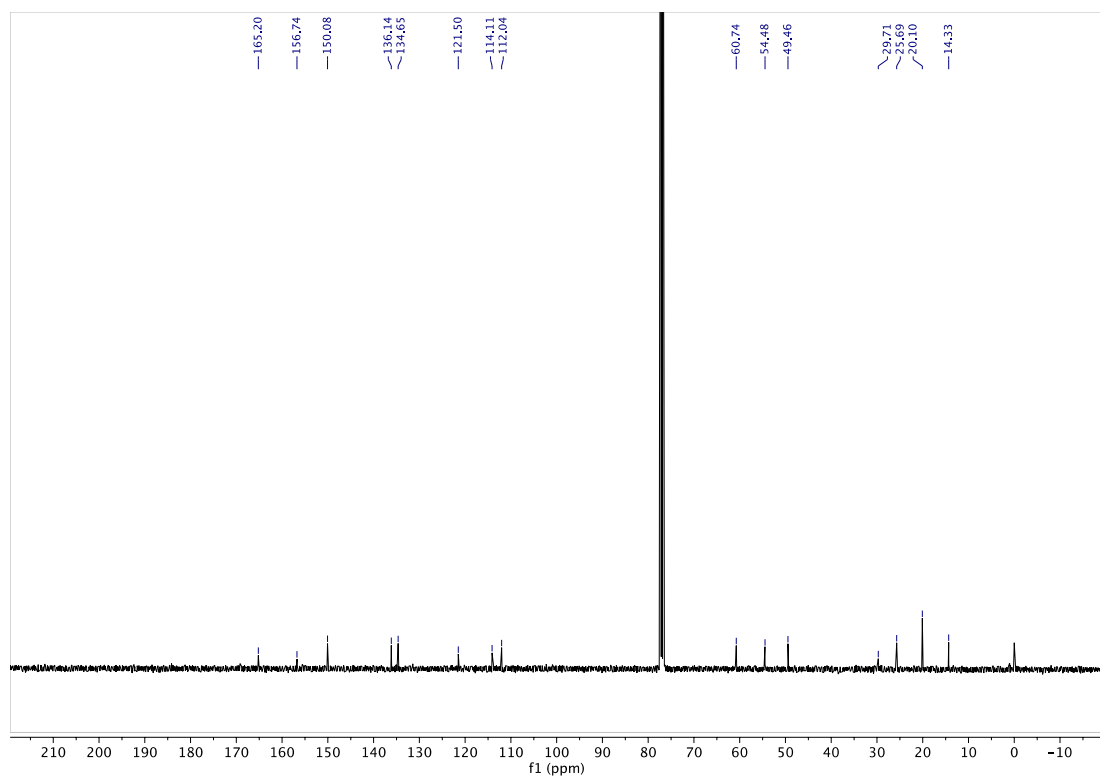

$^1\text{H}$  NMR for Ethyl 1-benzyl-1,2-dihydro-1,8-naphthyridine-3-carboxylate (**13d**)

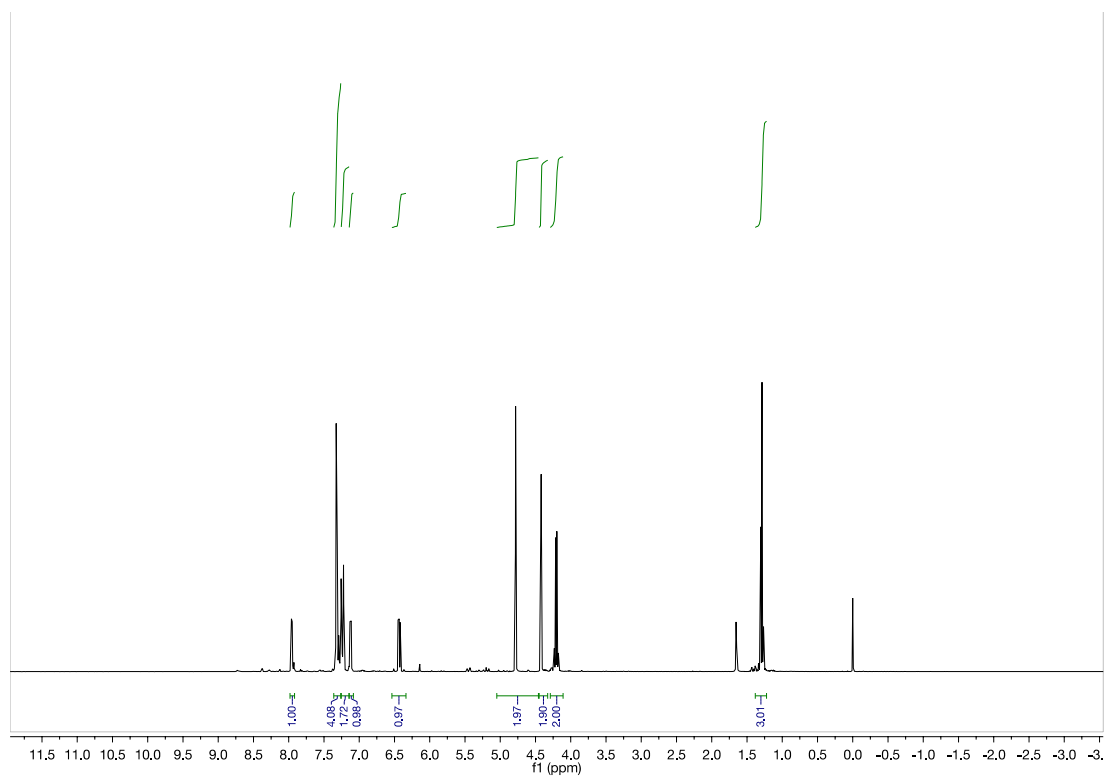

$^{13}\text{C}$  NMR for Ethyl 1-benzyl-1,2-dihydro-1,8-naphthyridine-3-carboxylate (**13d**)

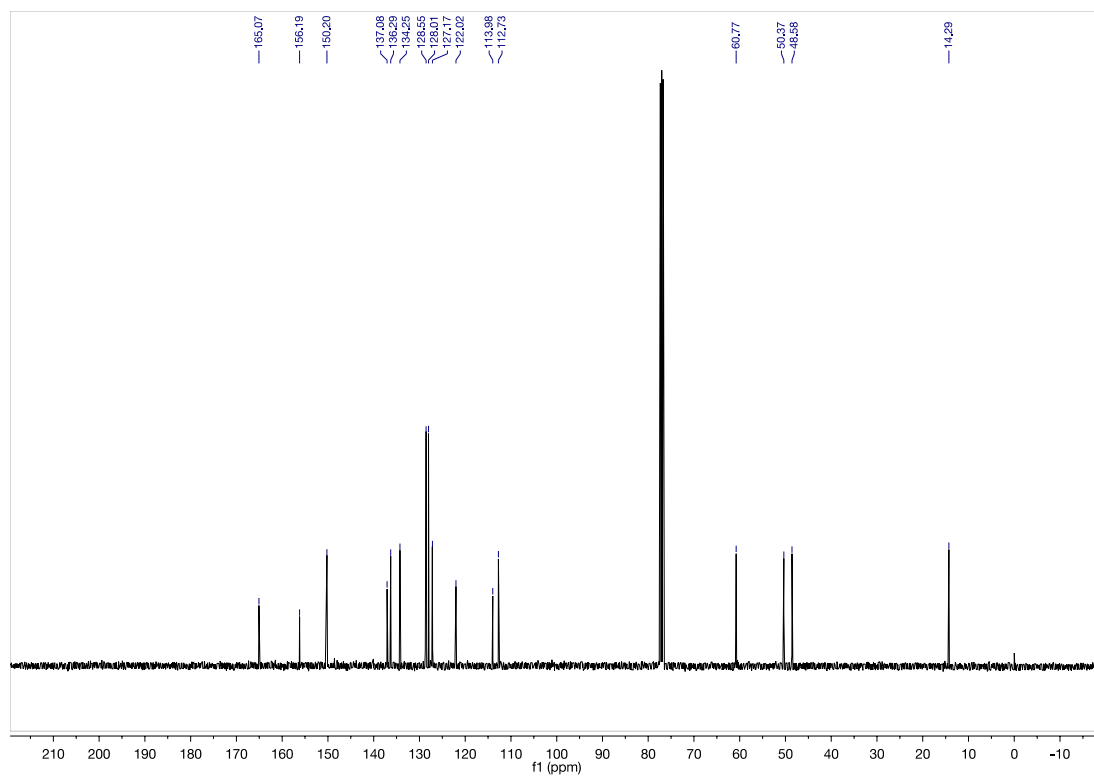



$^1\text{H}$  NMR for Ethyl 1-phenethyl-1,2-dihydro-1,8-naphthyridine-3-carboxylate (**13e**)

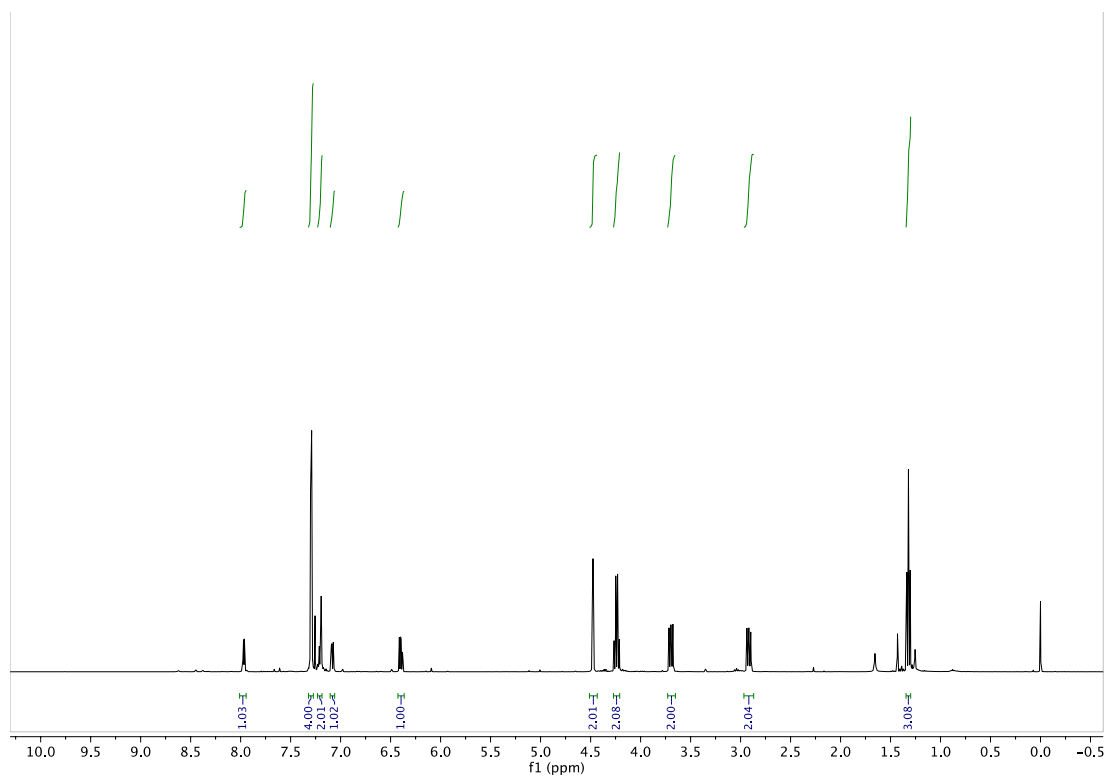

$^{13}\text{C}$  NMR for Ethyl 1-phenethyl-1,2-dihydro-1,8-naphthyridine-3-carboxylate (**13e**)

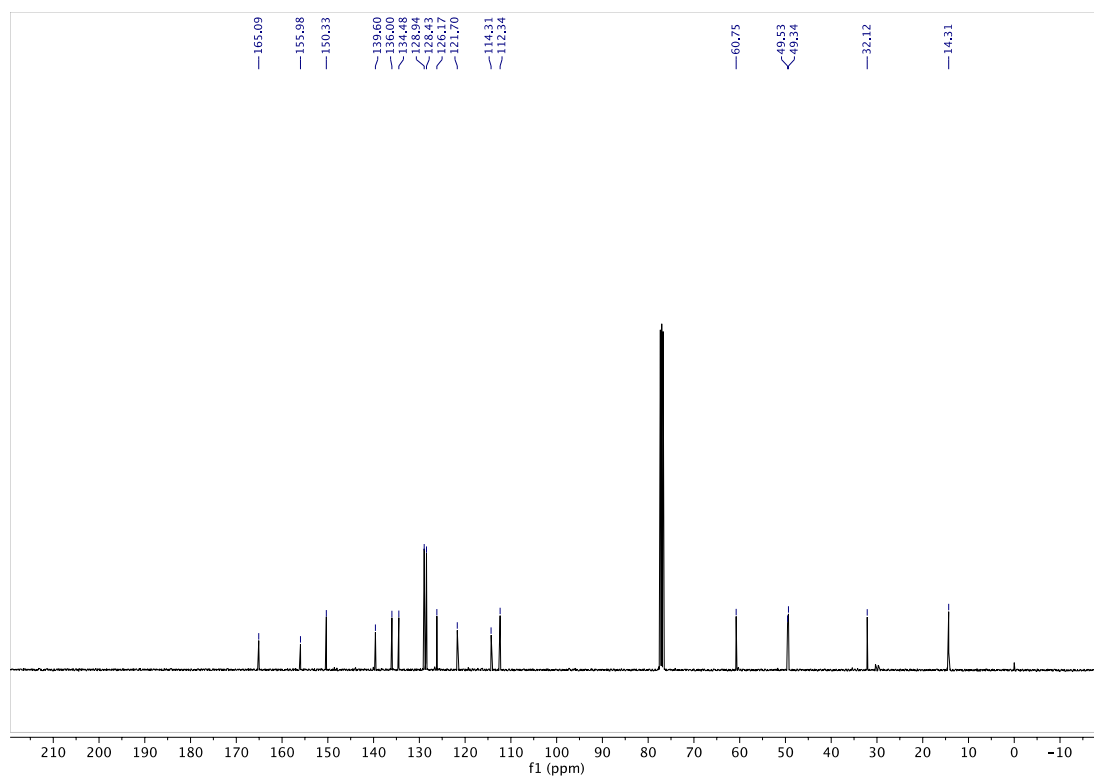

$^1\text{H}$  NMR for Ethyl 1-phenyl-1,2-dihydro-1,8-naphthyridine-3-carboxylate (**13f**)

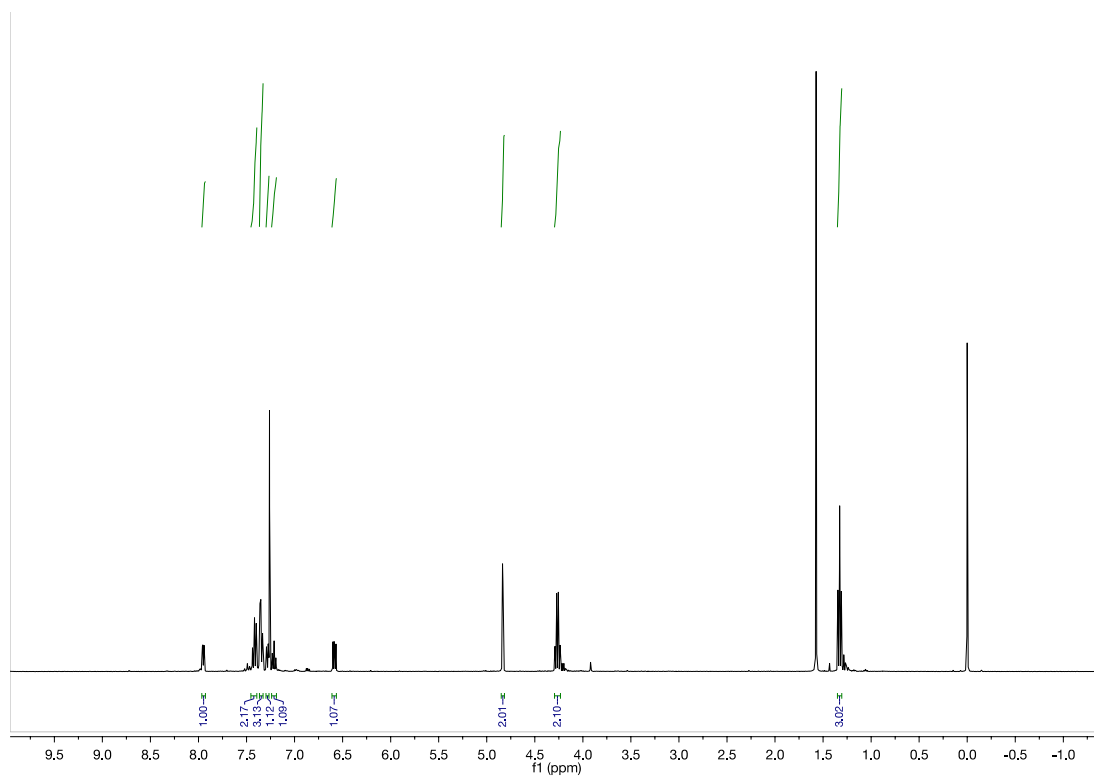

$^{13}\text{C}$  NMR for Ethyl 1-phenyl-1,2-dihydro-1,8-naphthyridine-3-carboxylate (**13f**)

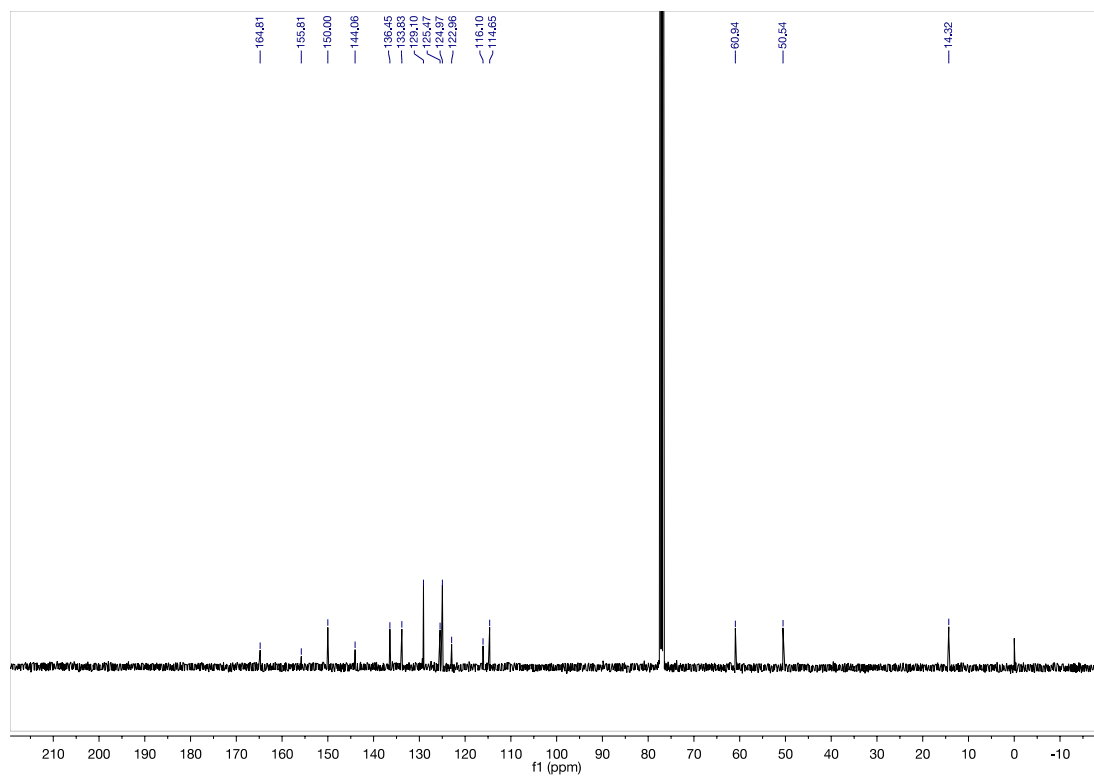

$^1\text{H}$  NMR for 1-Hexyl-1,2-dihydro-1,8-naphthyridine-3-carbonitrile (**14b**)

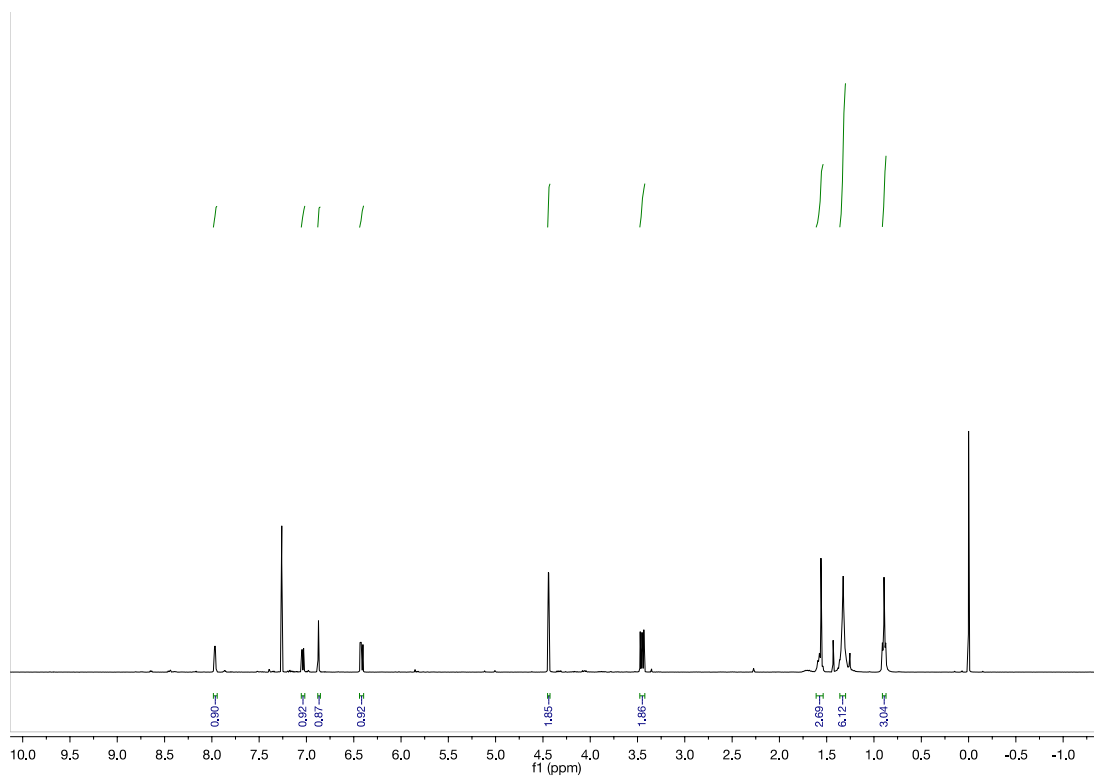

$^{13}\text{C}$  NMR for 1-Hexyl-1,2-dihydro-1,8-naphthyridine-3-carbonitrile (**14b**)

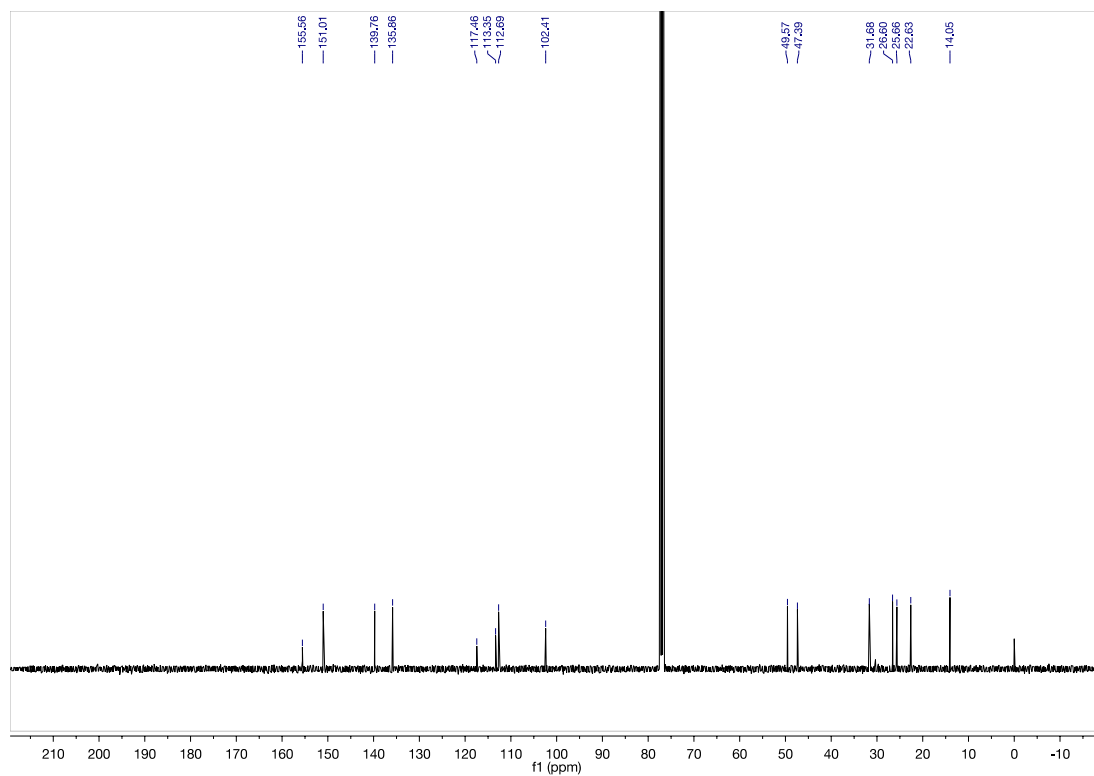

$^1\text{H}$  NMR for 1-Benzyl-1,2-dihydro-1,8-naphthyridine-3-carbonitrile (**14d**)

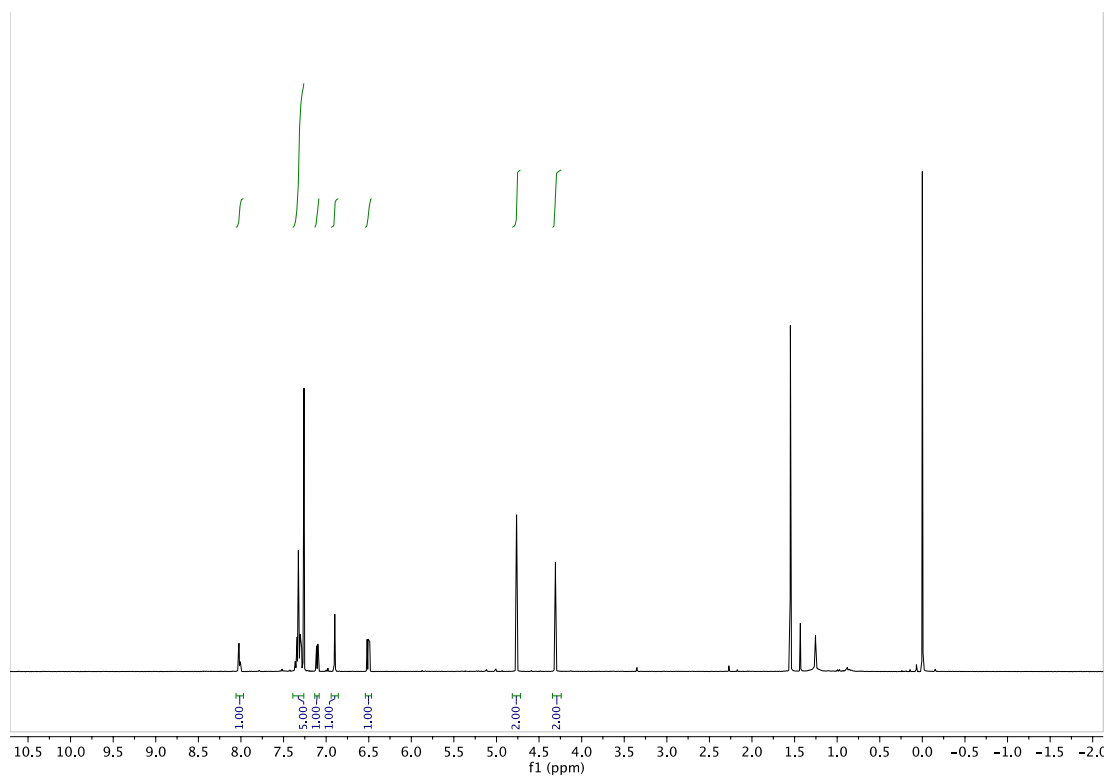

$^{13}\text{C}$  NMR for 1-Benzyl-1,2-dihydro-1,8-naphthyridine-3-carbonitrile (**14d**)

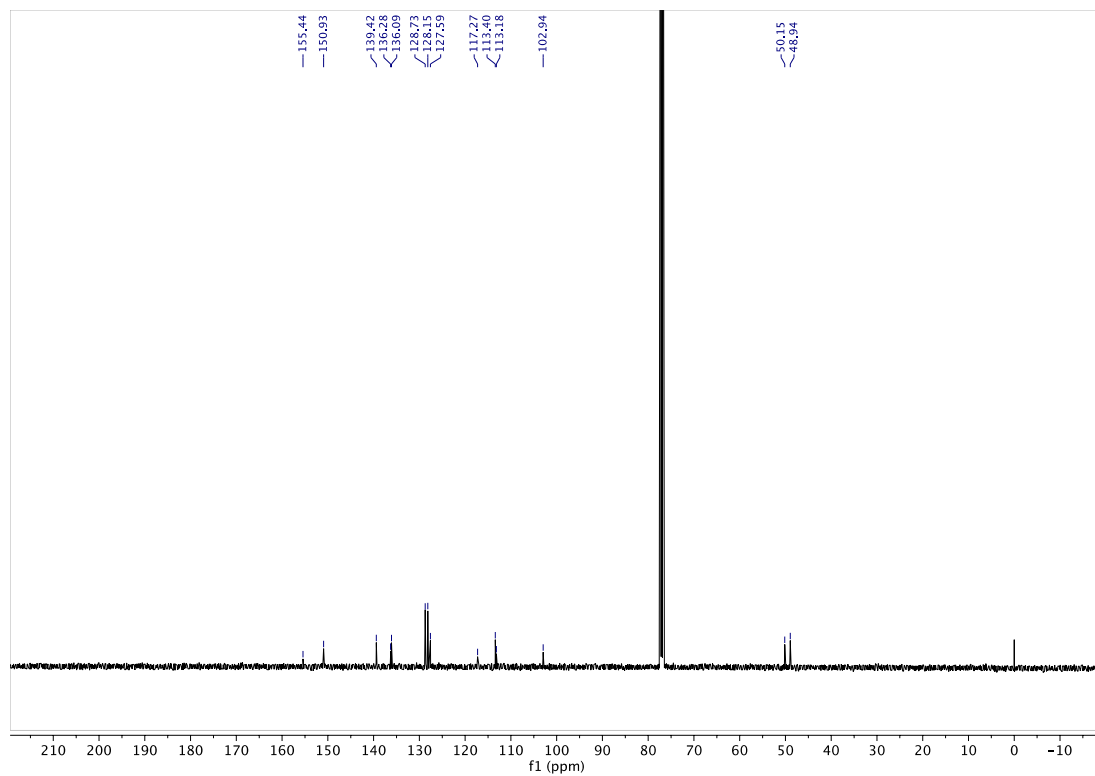

<sup>1</sup>H NMR for 1-Phenethyl-1,2-dihydro-1,8-naphthyridine-3-carbonitrile (**14e**)

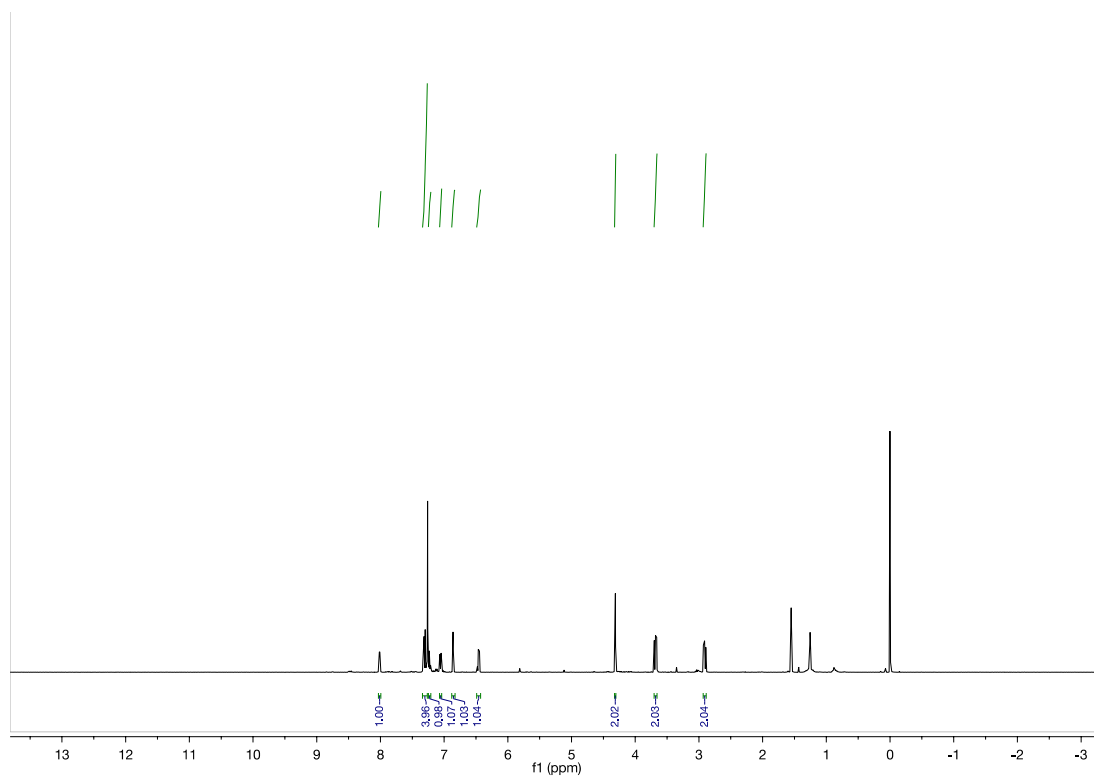

<sup>13</sup>C NMR for 1-Phenethyl-1,2-dihydro-1,8-naphthyridine-3-carbonitrile (**14e**)

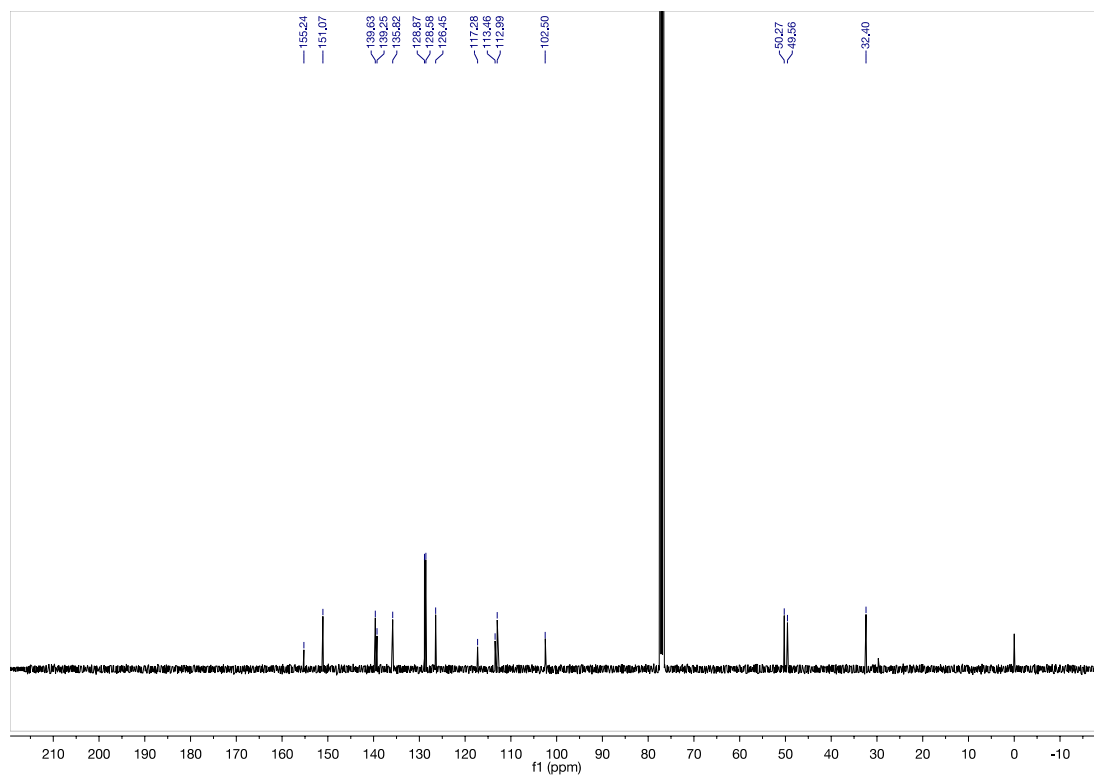

**Unexpected double bond migrated products**  
<sup>1</sup>H NMR for 1-Benzyl-1,4-dihydroquinoline-3-carbonitrile (**15d**)

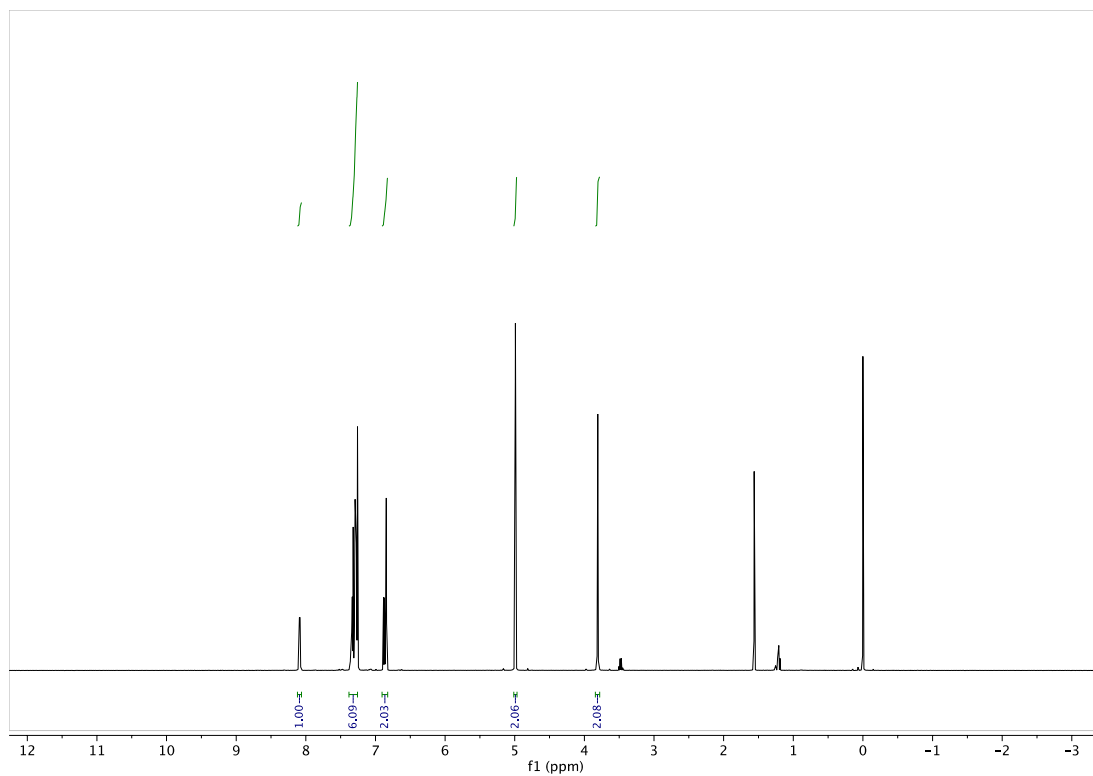

<sup>13</sup>C NMR for 1-Benzyl-1,4-dihydroquinoline-3-carbonitrile (**15d**)

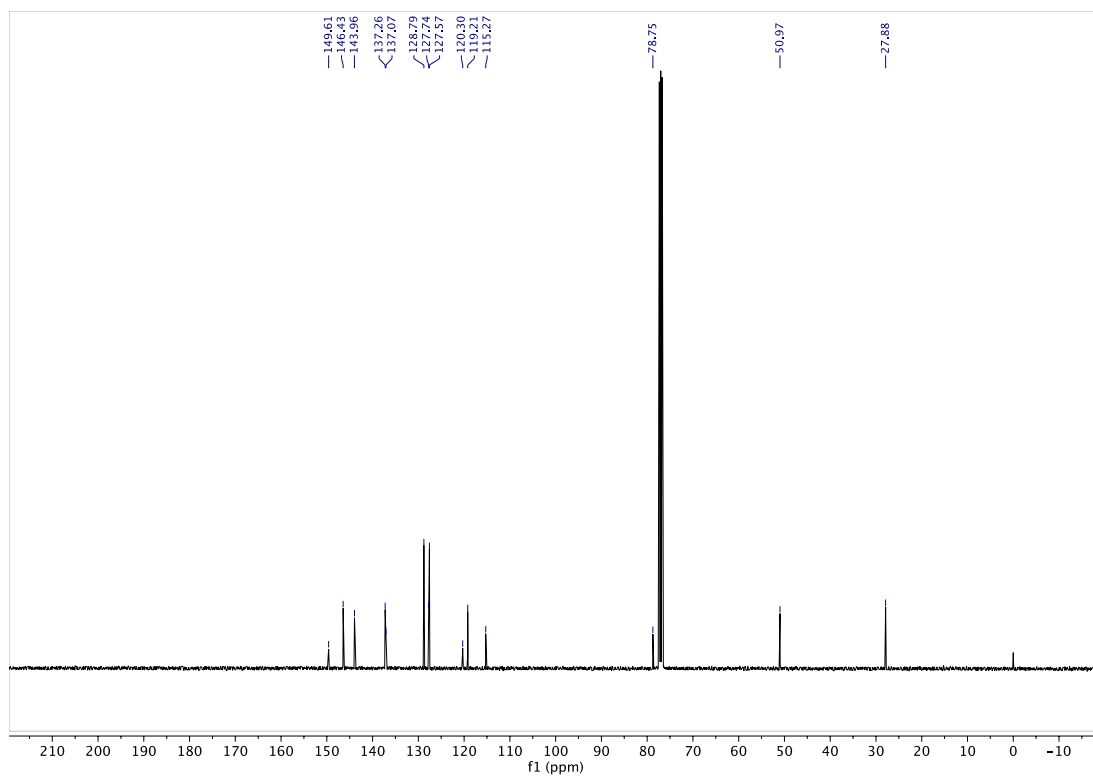

$^1\text{H}$  NMR for 1-Phenyl-1,4-dihydroquinoline-3-carbonitrile (**15f**)

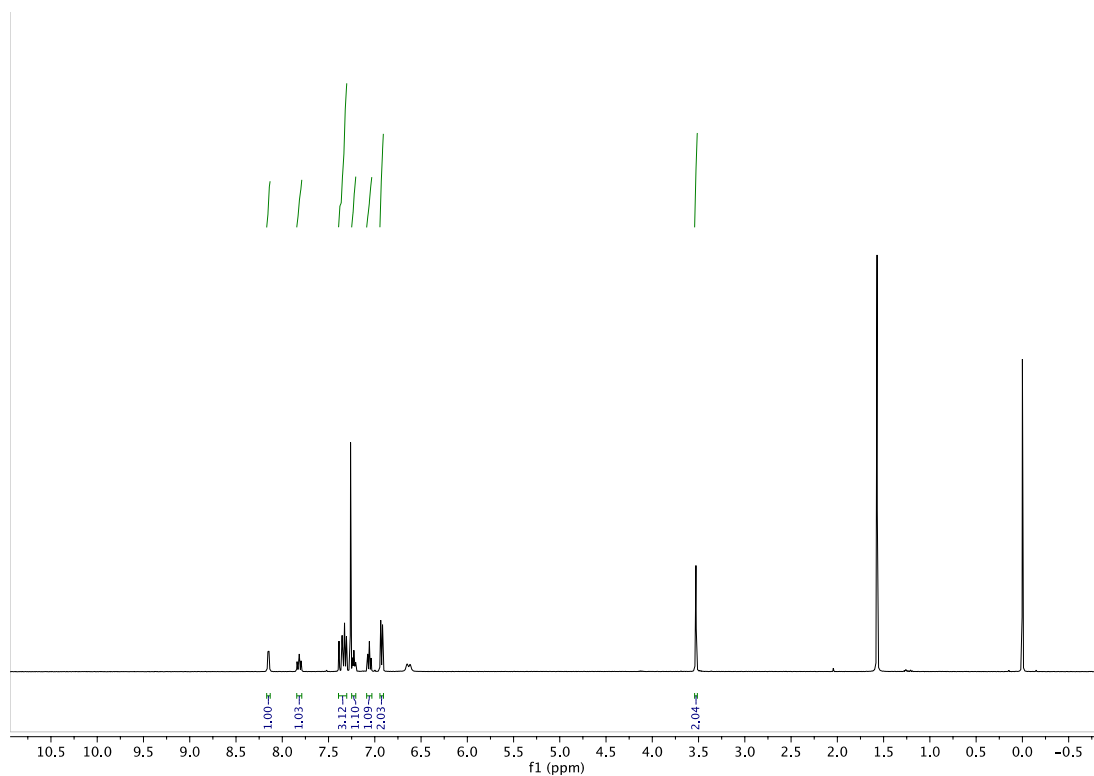

$^{13}\text{C}$  NMR for 1-Phenyl-1,4-dihydroquinoline-3-carbonitrile (**15f**)

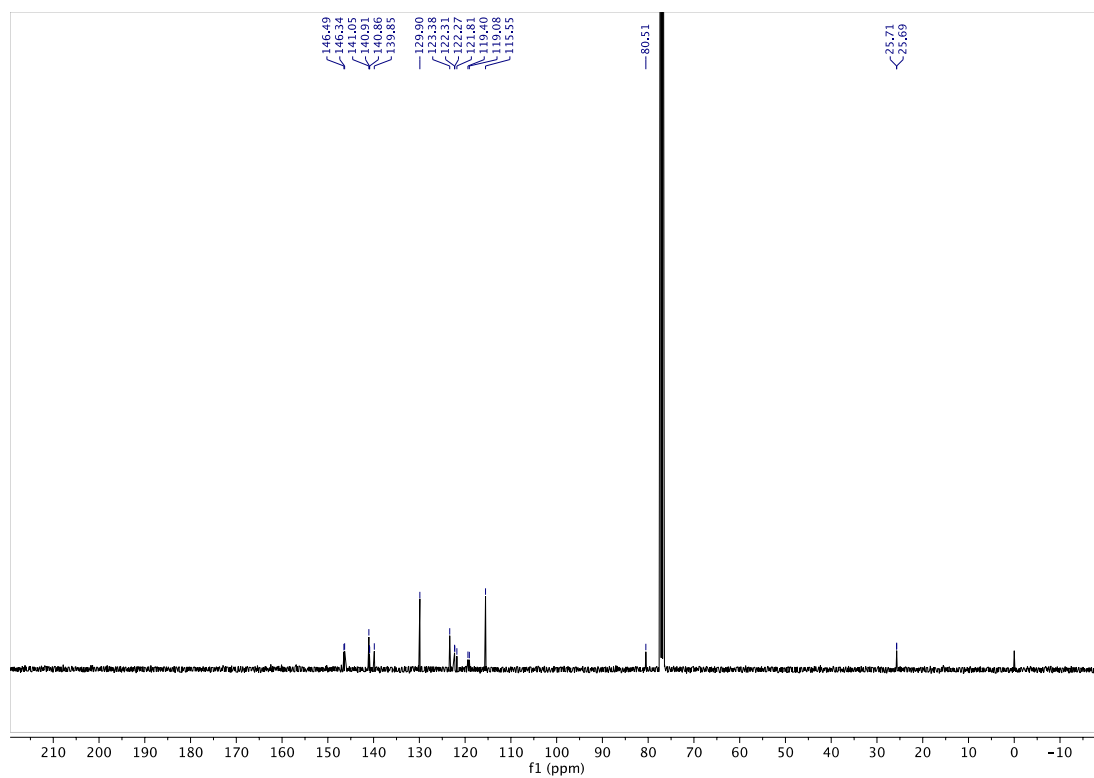

$^1\text{H}$  NMR for (Z)-2-((Benzylamino)methyl)-3-(2-fluoro-5-nitrophenyl)acrylonitrile (**16**)

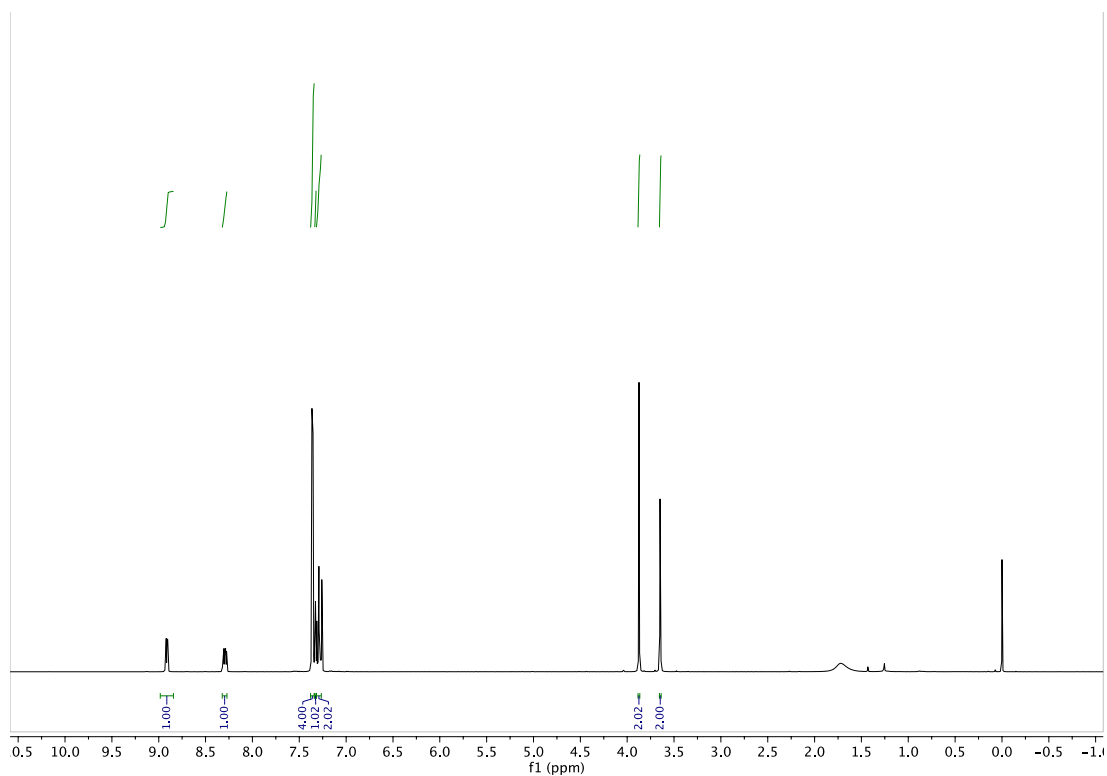

$^{13}\text{C}$  NMR for (Z)-2-((Benzylamino)methyl)-3-(2-fluoro-5-nitrophenyl) acrylonitrile (**16**)

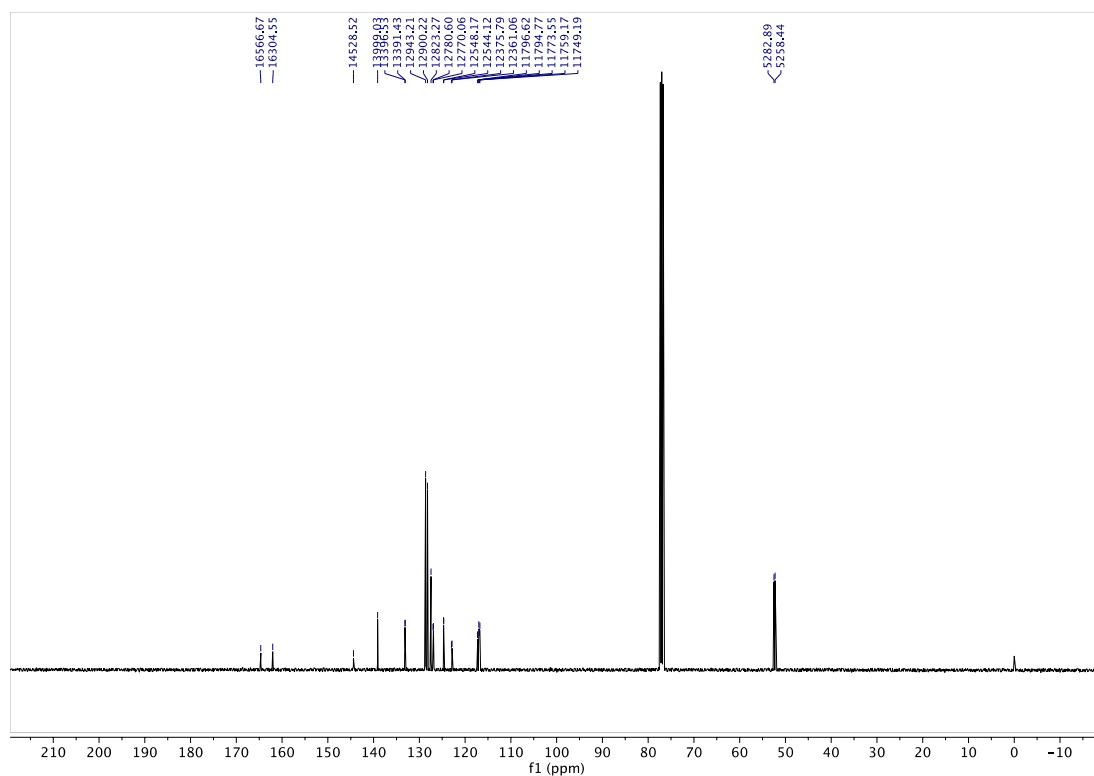



<sup>1</sup>H NMR for Ethyl 6-fluoro-1-methyl-1,2-dihydroquinoline-3-carboxylate (**18a**)

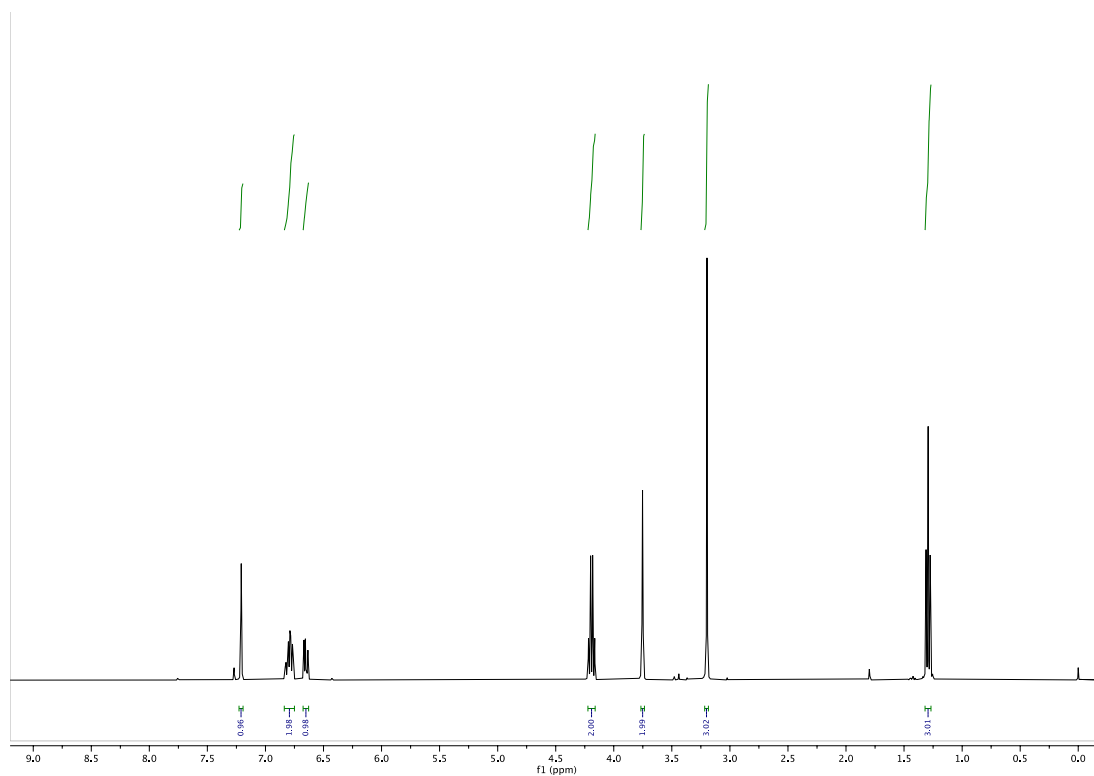

<sup>13</sup>C NMR for Ethyl 6-fluoro-1-methyl-1,2-dihydroquinoline-3-carboxylate (**18a**)

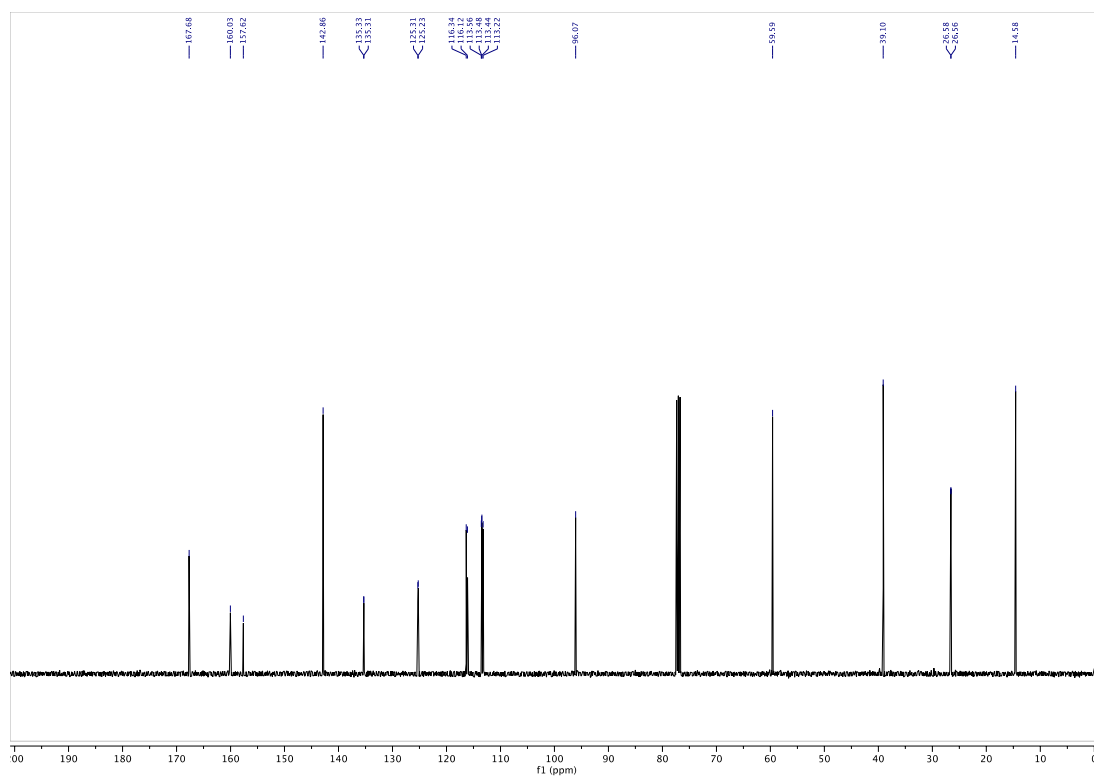

$^1\text{H}$  NMR for Ethyl 6-fluoro-1-hexyl-1,2-dihydroquinoline-3-carboxylate (**18b**)

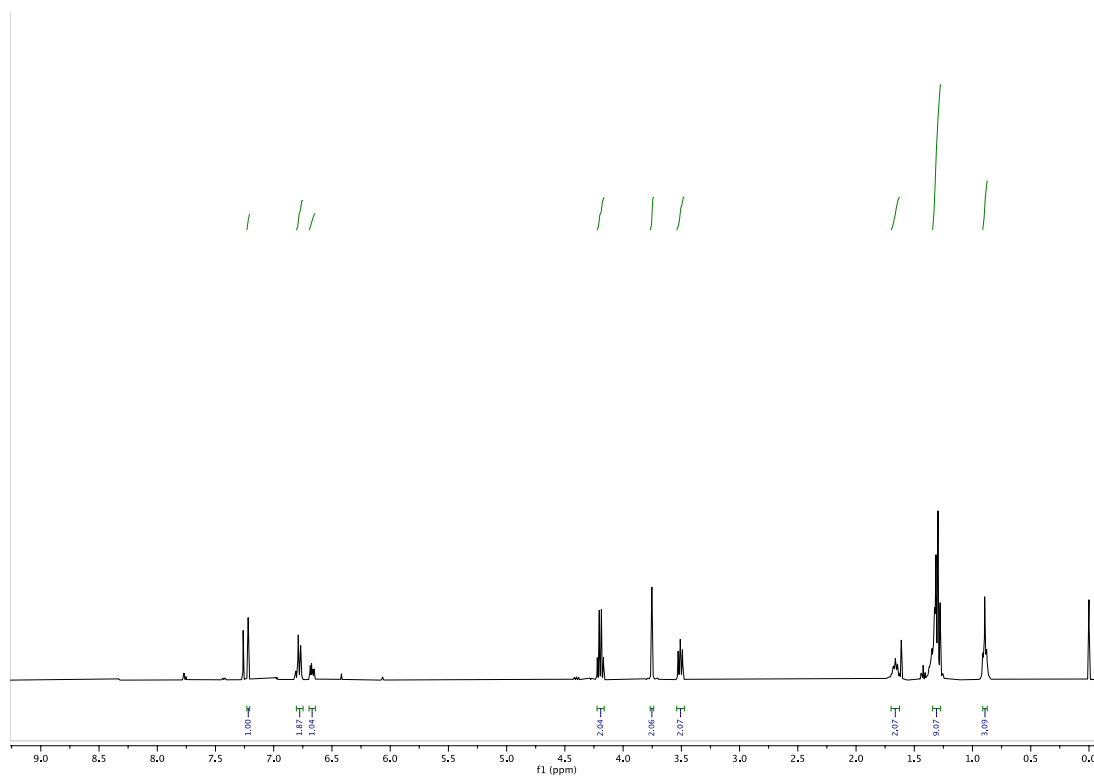

$^{13}\text{C}$  NMR for Ethyl 6-fluoro-1-hexyl-1,2-dihydroquinoline-3-carboxylate (**18b**)

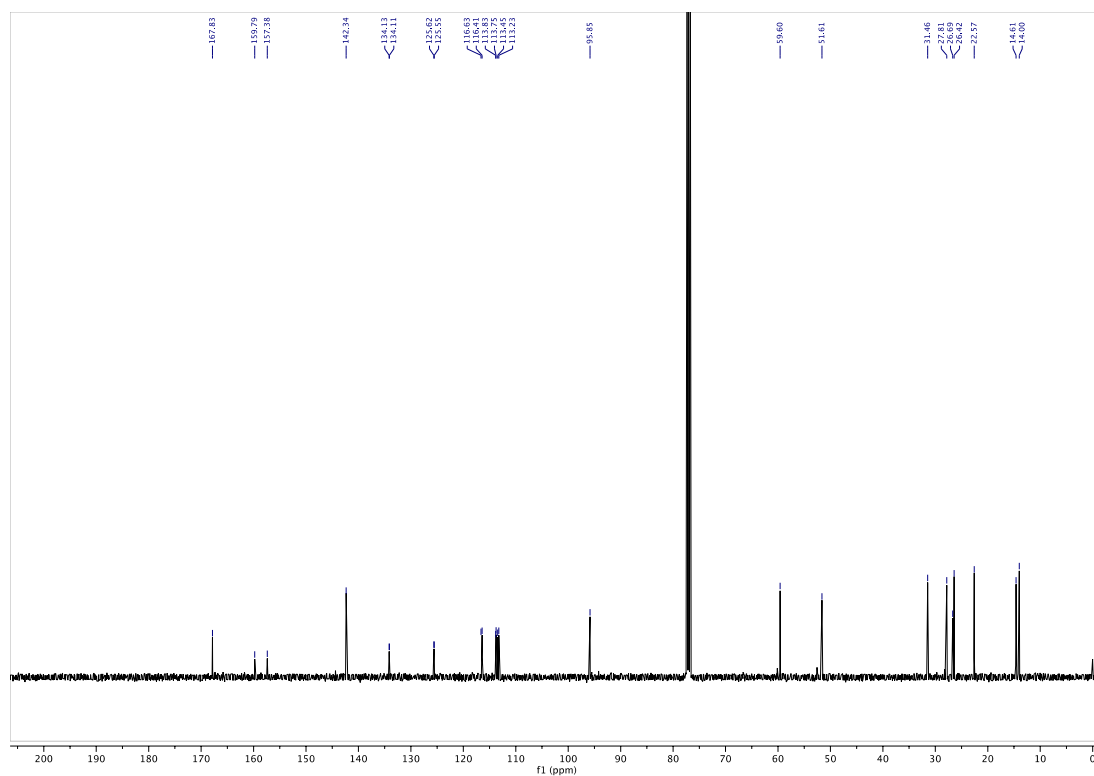

$^1\text{H}$  NMR for Ethyl 6-fluoro-1-isobutyl-1,2-dihydroquinoline-3-carboxylate (**18c**)

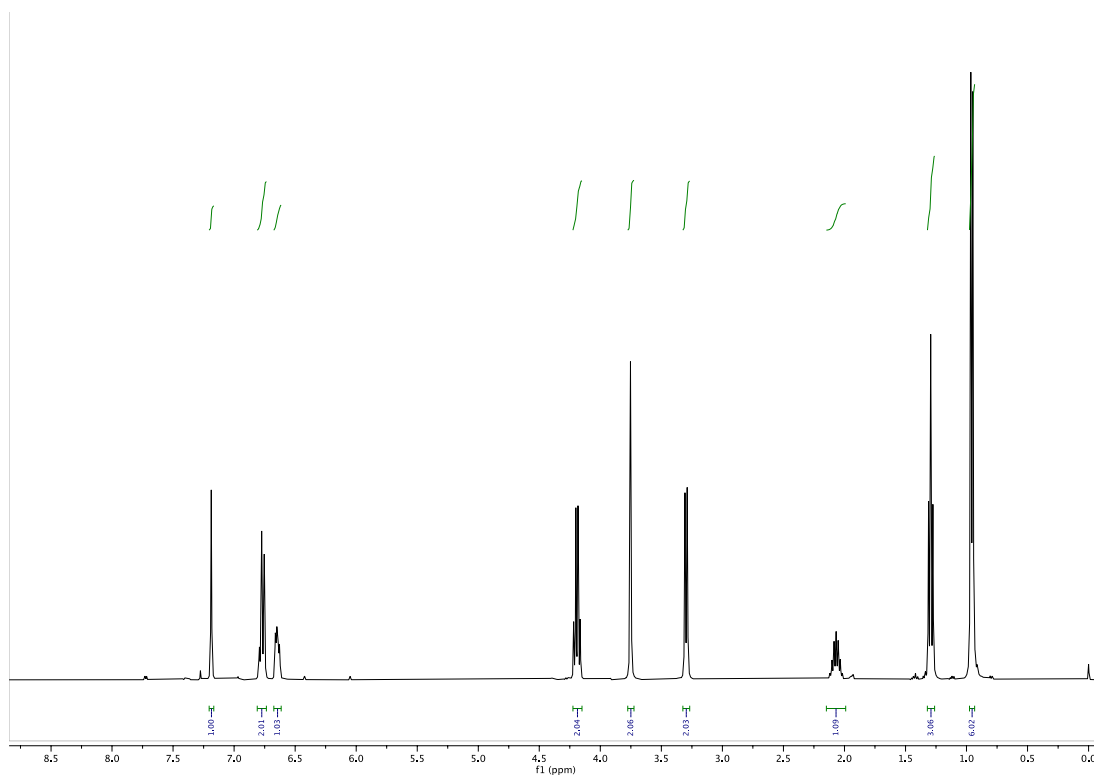

$^{13}\text{C}$  NMR for Ethyl 6-fluoro-1-isobutyl-1,2-dihydroquinoline-3-carboxylate (**18c**)

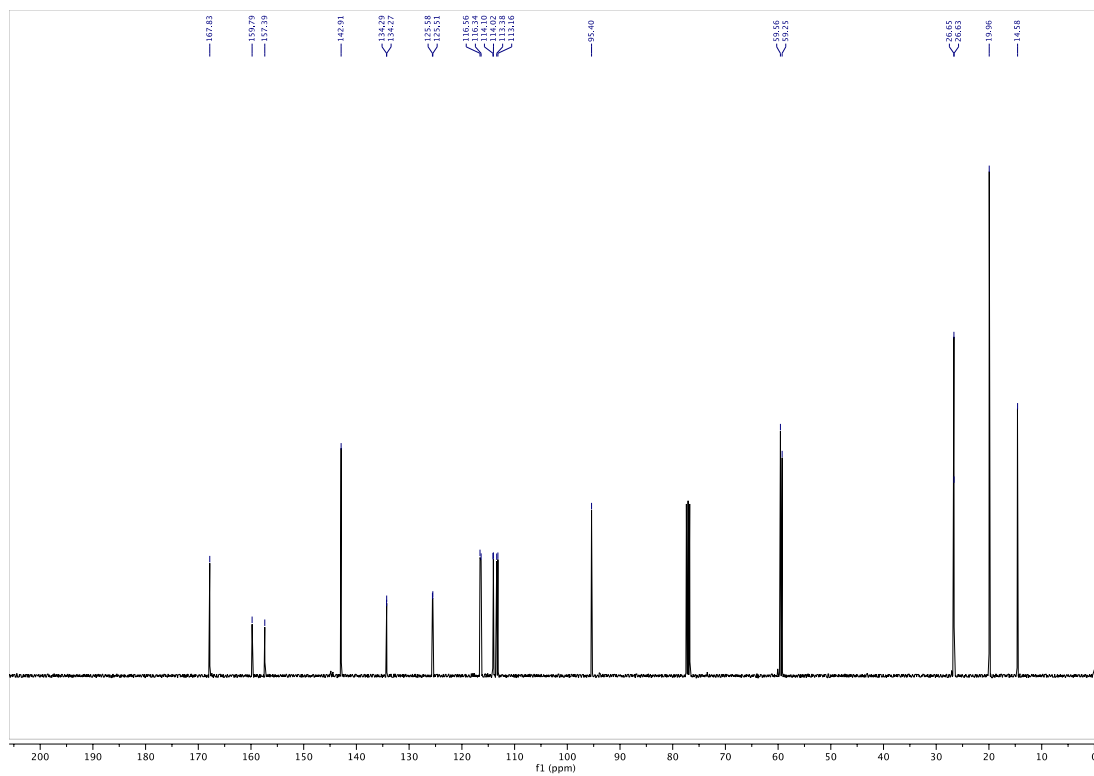

<sup>1</sup>H NMR for Ethyl 1-benzyl-6-fluoro-1,2-dihydroquinoline-3-carboxylate (**18d**)

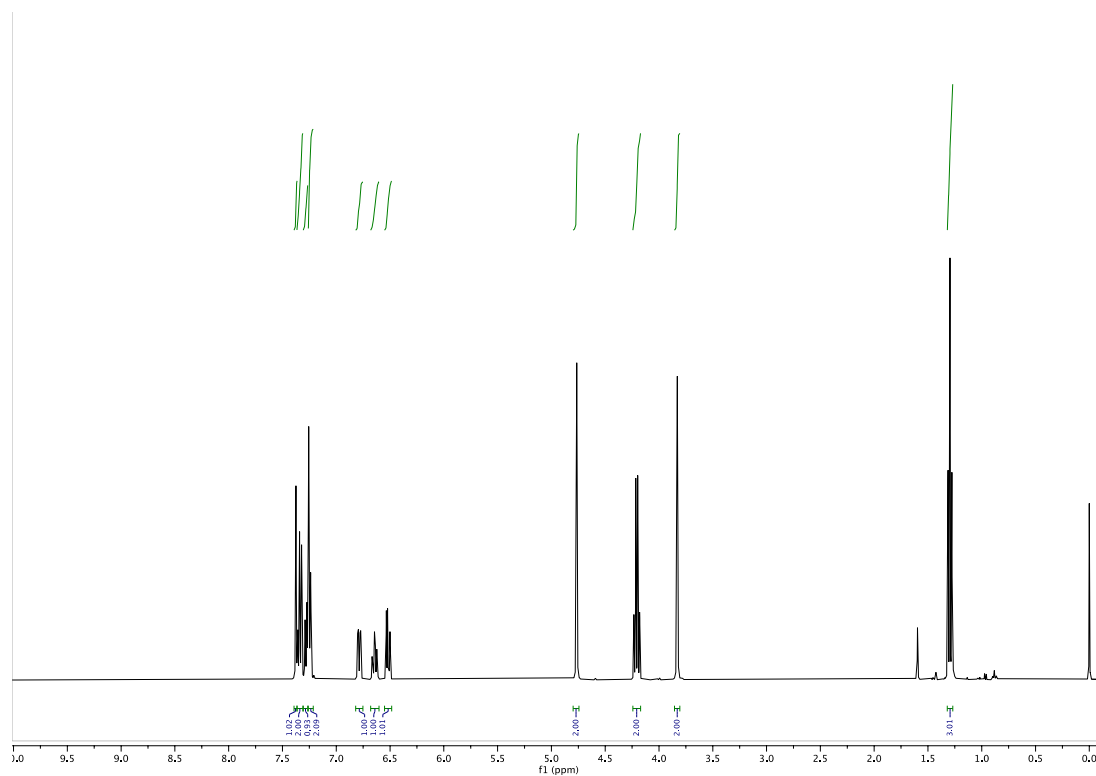

<sup>13</sup>C NMR for Ethyl 1-benzyl-6-fluoro-1,2-dihydroquinoline-3-carboxylate (**18d**)

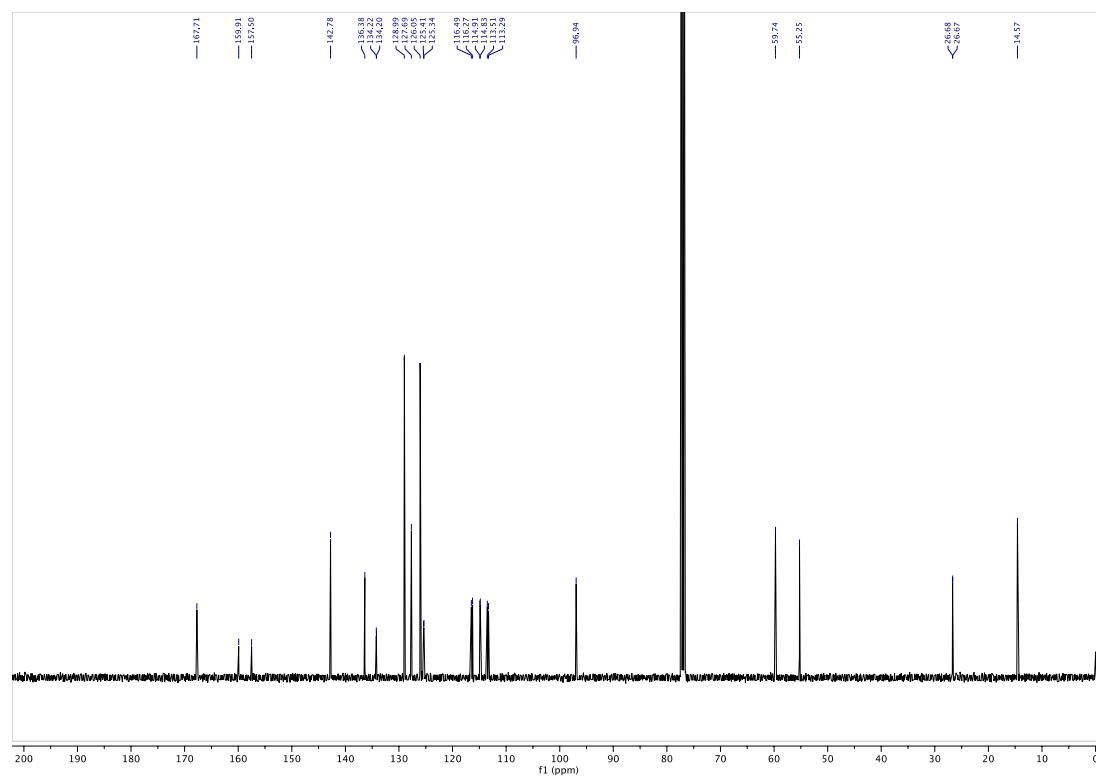

<sup>1</sup>H NMR for Ethyl 6-fluoro-1-phenethyl-1,2-dihydroquinoline-3-carboxylate (**18e**)

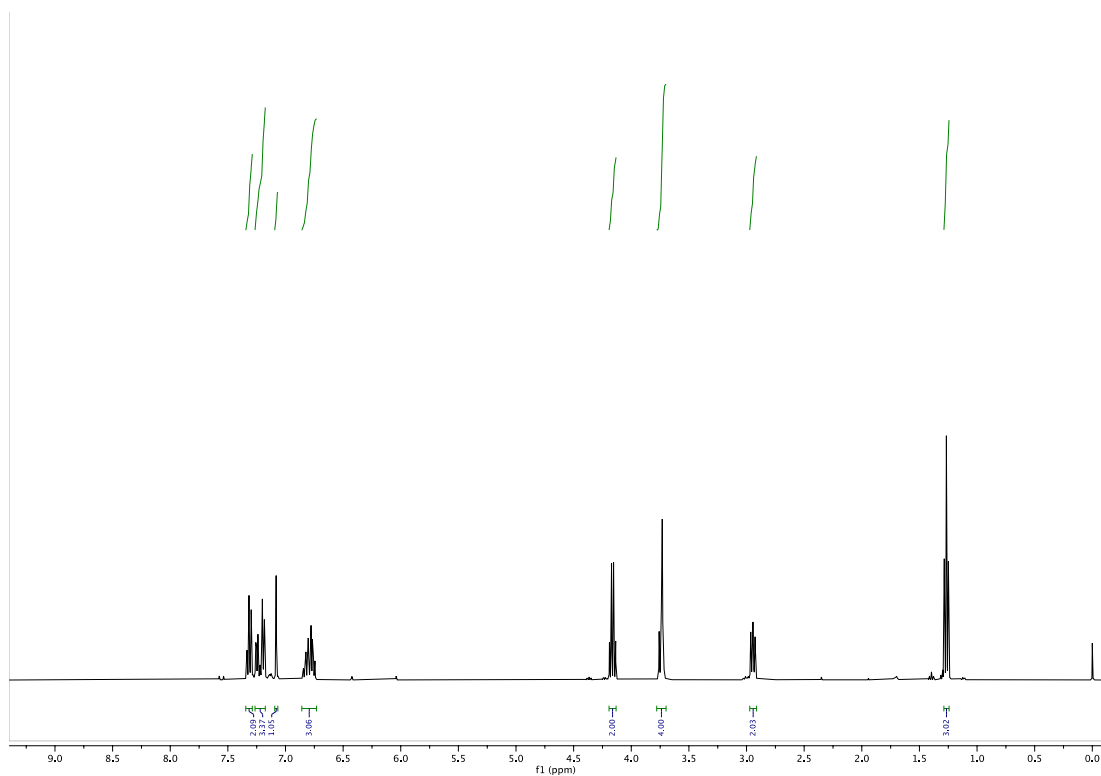

<sup>13</sup>C NMR for Ethyl 6-fluoro-1-phenethyl-1,2-dihydroquinoline-3-carboxylate (**18e**)

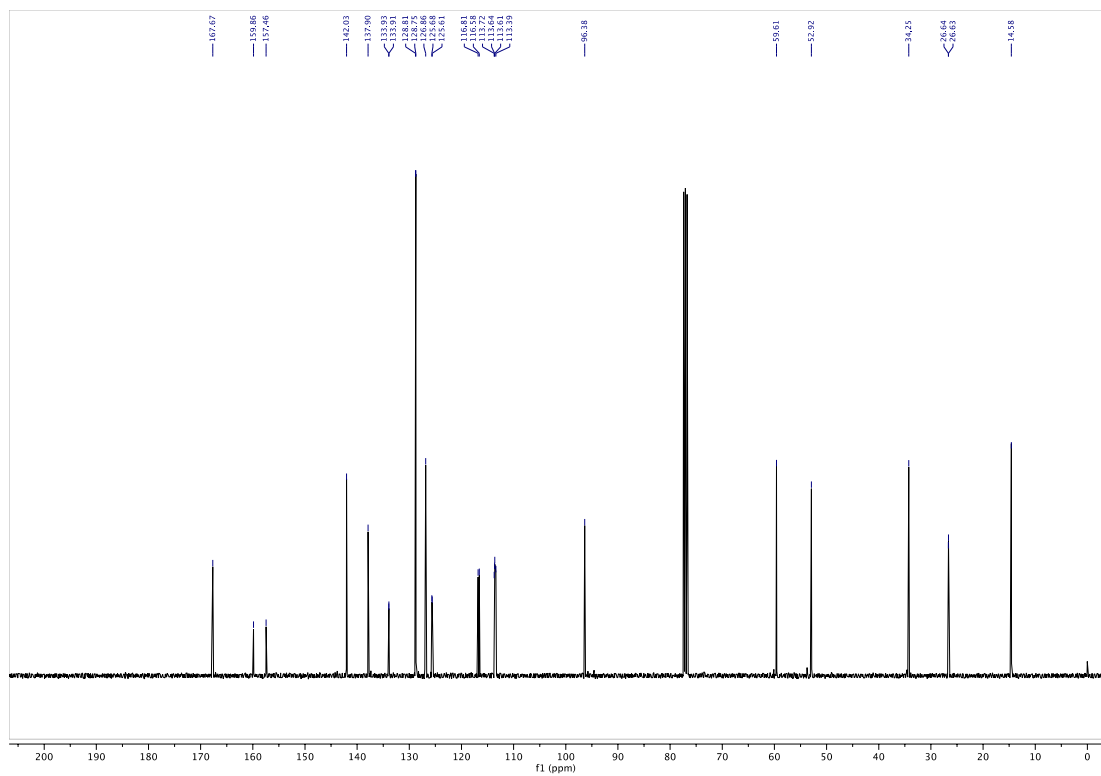

<sup>1</sup>H NMR for Ethyl 6-fluoro-1-methyl-4-oxo-1,4-dihydroquinoline-3-carboxylate (**19a**)

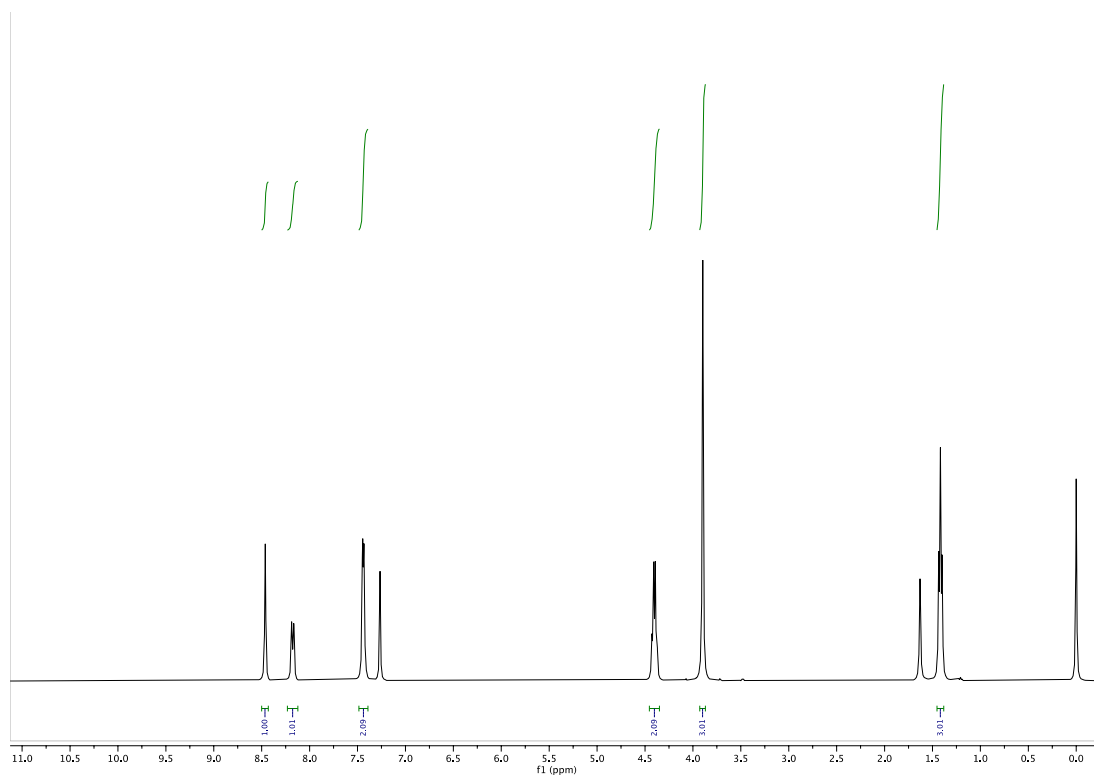

<sup>13</sup>C NMR for Ethyl 6-fluoro-1-methyl-4-oxo-1,4-dihydroquinoline-3-carboxylate (**19a**)

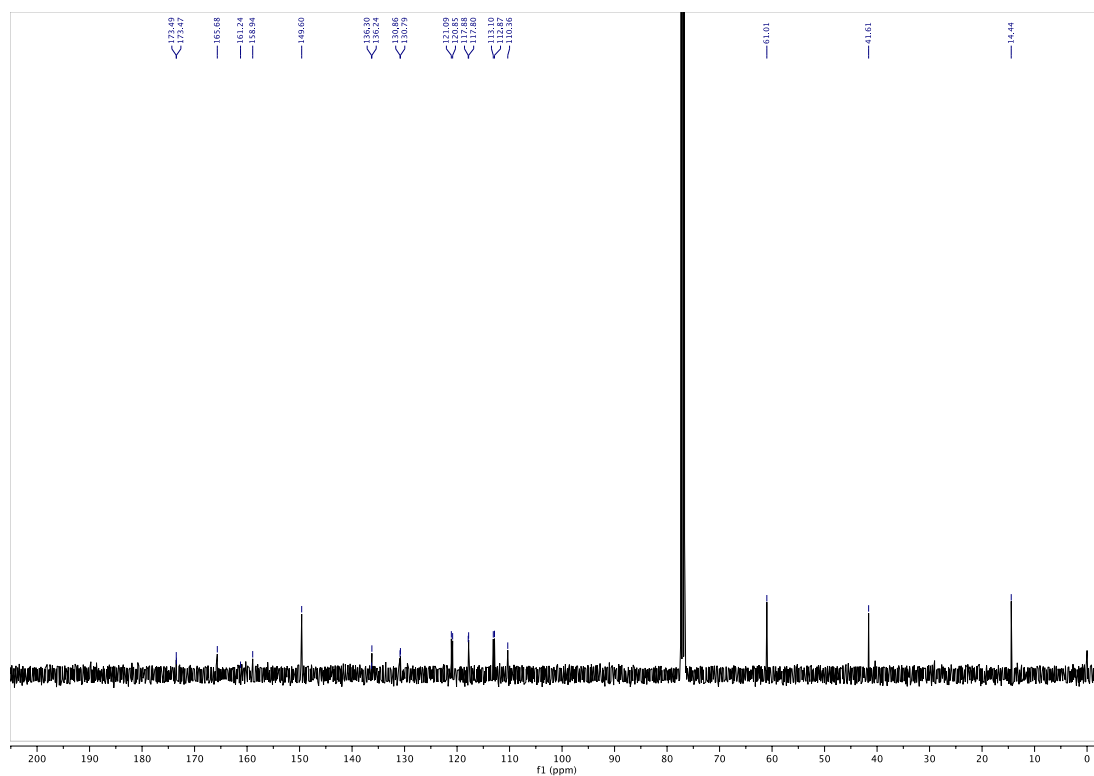

<sup>1</sup>H NMR for Ethyl 6-fluoro-1-isobutyl-4-oxo-1,4-dihydroquinoline-3-carboxylate (**19c**)

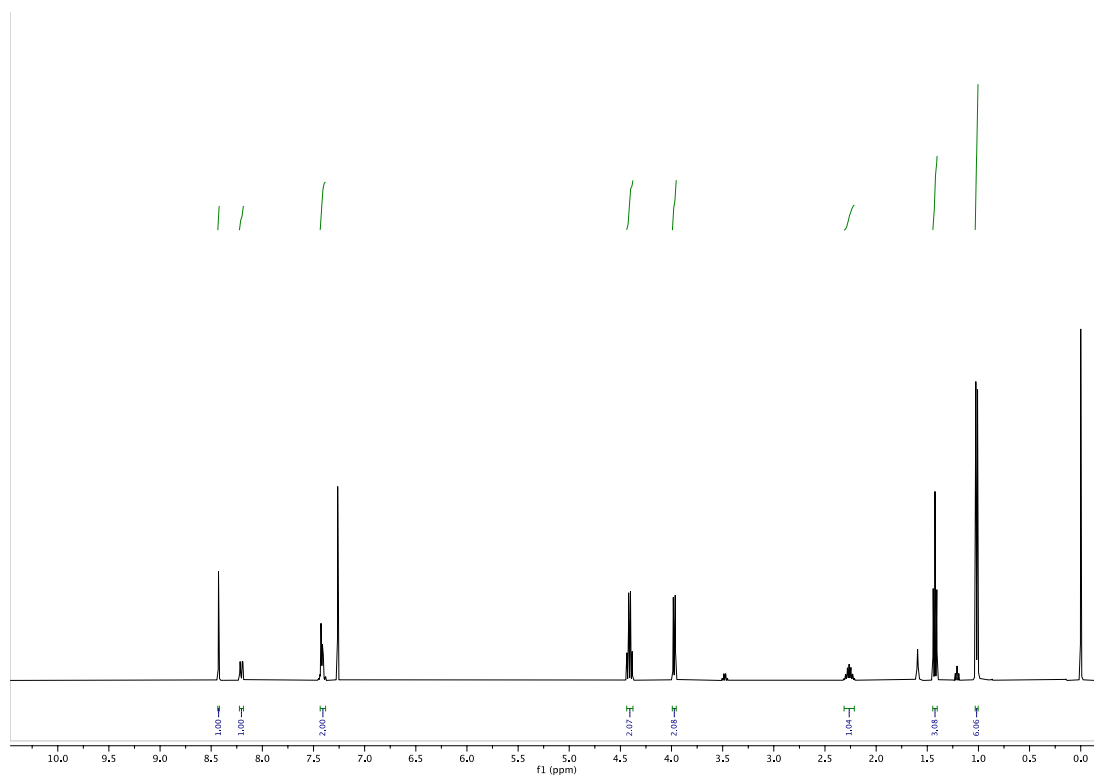

<sup>13</sup>C NMR for Ethyl 6-fluoro-1-isobutyl-4-oxo-1,4-dihydroquinoline-3-carboxylate (**19c**)

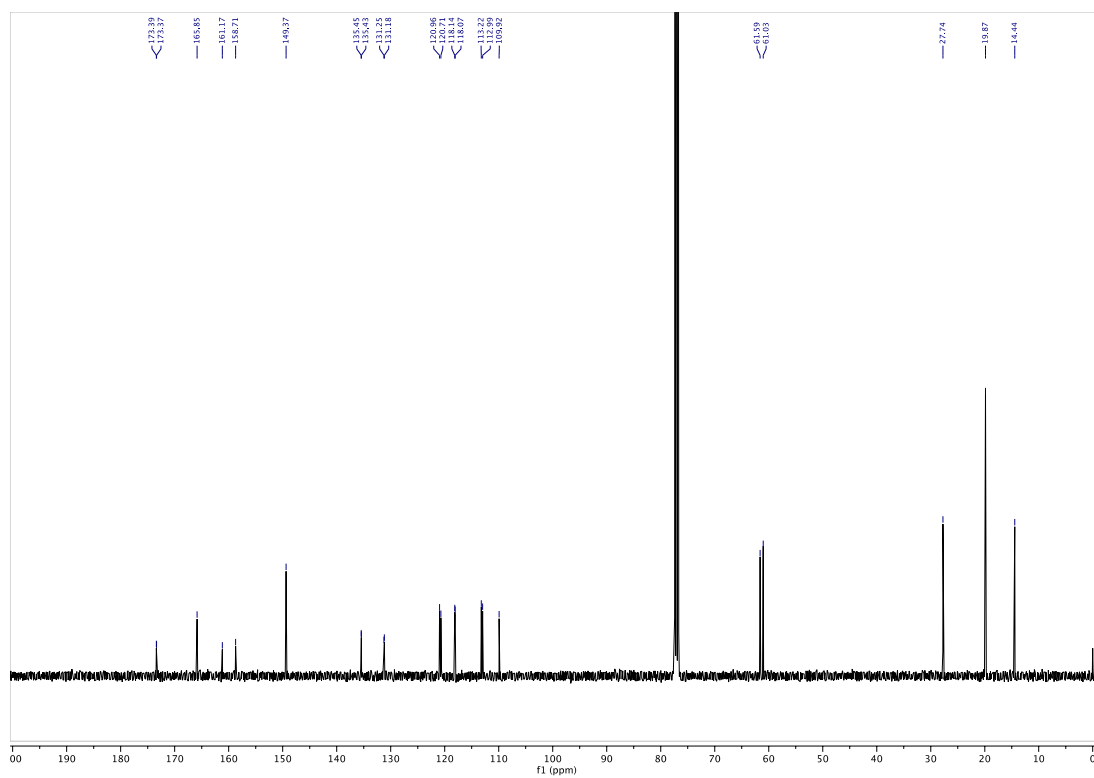

<sup>1</sup>H NMR for Ethyl 1-benzyl-6-fluoro-4-oxo-1,4-dihydroquinoline-3-carboxylate (**19d**)

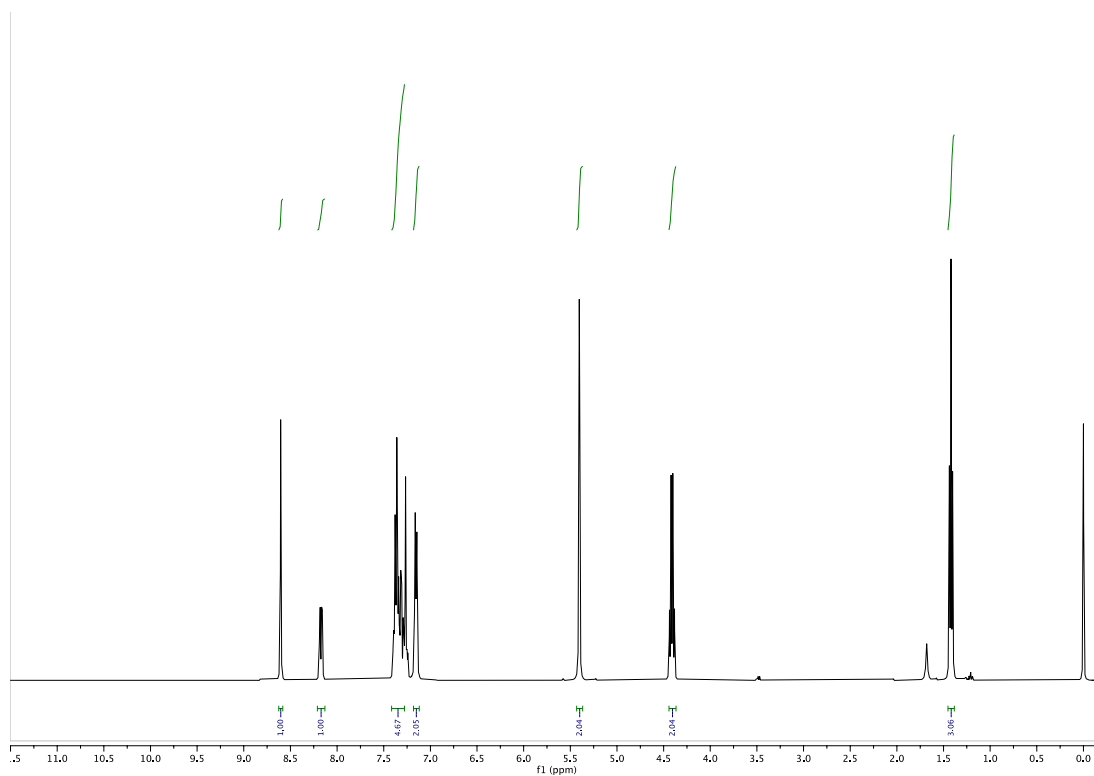

<sup>13</sup>C NMR for Ethyl 1-benzyl-6-fluoro-4-oxo-1,4-dihydroquinoline-3-carboxylate (**19d**)

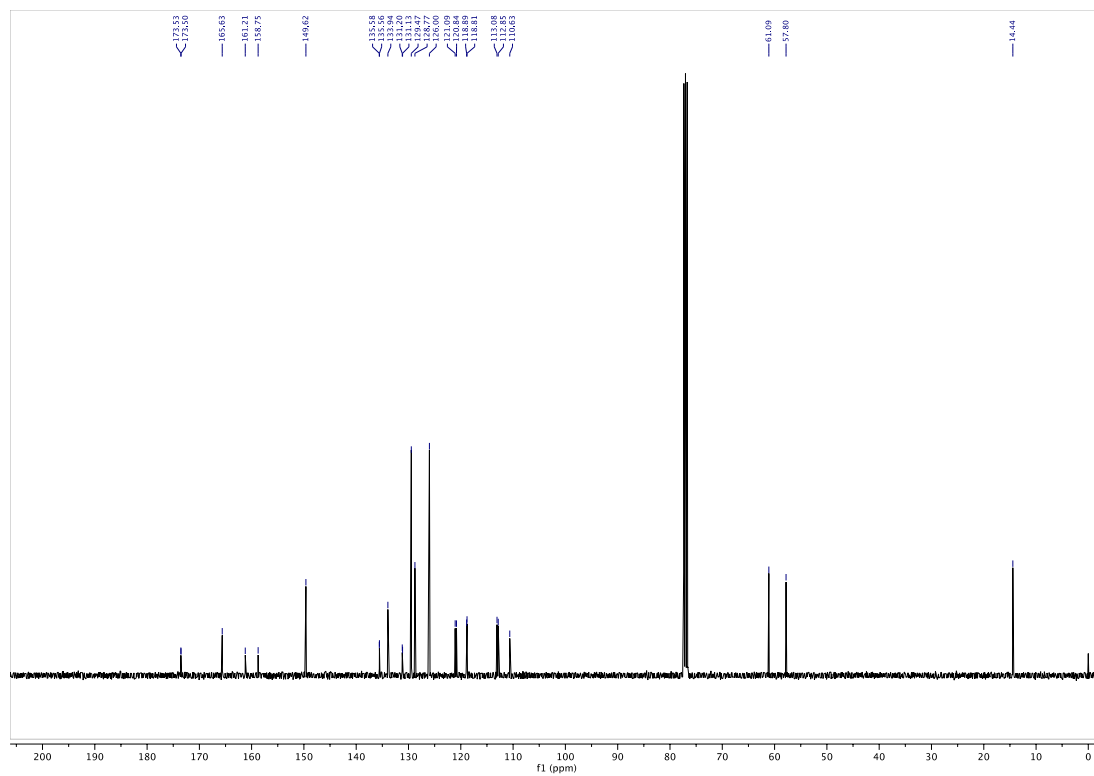



<sup>1</sup>H NMR for Ethyl 6-fluoro-4-oxo-1-phenethyl-1,4-dihydroquinoline-3-carboxylate (**19e**)

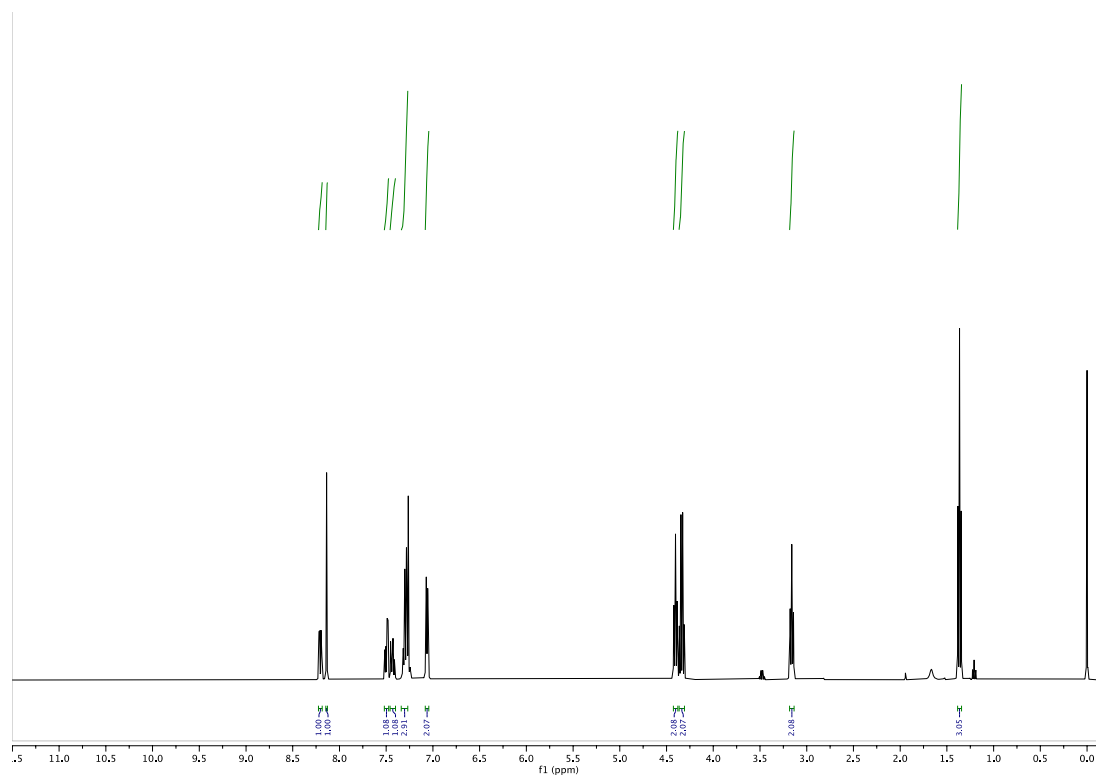

<sup>13</sup>C NMR for Ethyl 6-fluoro-4-oxo-1-phenethyl-1,4-dihydroquinoline-3-carboxylate (**19e**)

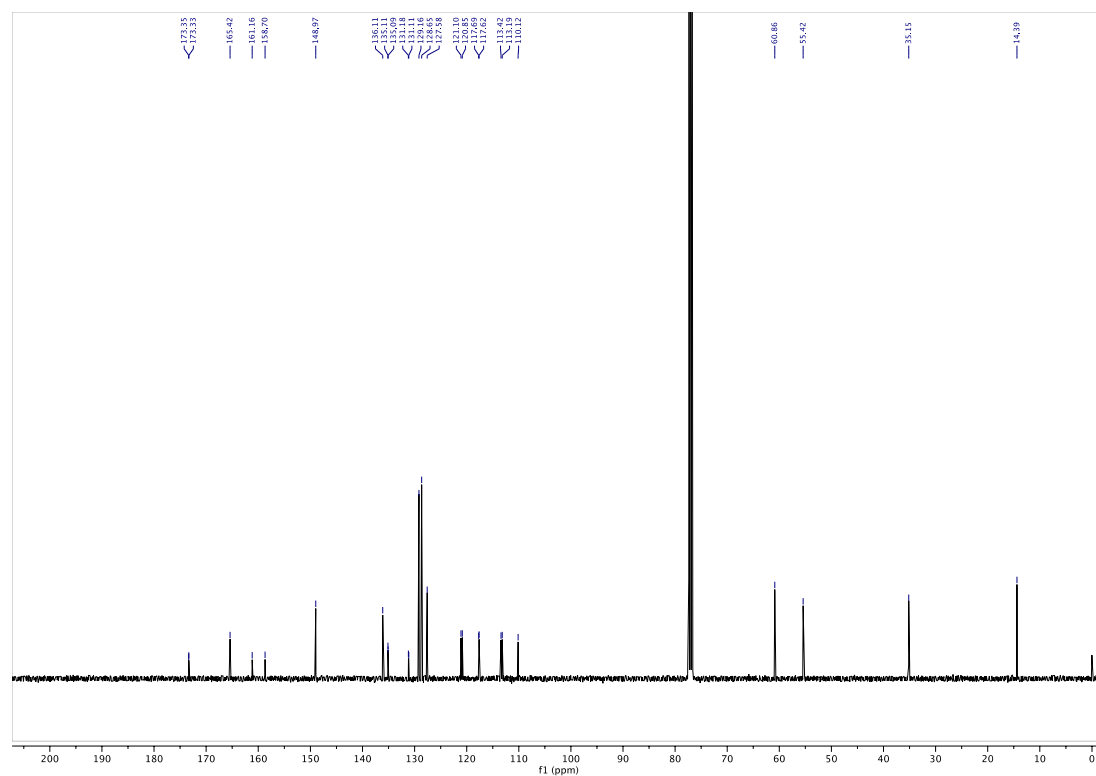

## Comment

The displacement ellipsoids were drawn at the 50% probability level.

## Experimental

A colorless, plate-shaped crystal of dimensions 0.044 x 0.196 x 0.258 mm was selected for structural analysis. Intensity data for this compound were collected using a D8 Quest  $\kappa$ -geometry diffractometer with a Bruker Photon II CMOS area detector [1,2] and an Incoatec I $\mu$ s microfocus Mo K $\alpha$  source ( $\lambda = 0.71073$  Å). The sample was cooled to 100(2) K. Cell parameters were determined from a least-squares fit of 7723 peaks in the range  $2.85 < \theta < 28.73^\circ$ . A total of 21066 data were measured in the range  $2.848 < \theta < 28.786^\circ$  using  $\phi$  and  $\omega$  oscillation frames. The data were corrected for absorption by the empirical method [3] giving minimum and maximum transmission factors of 0.6236 and 0.7458. The data were merged to form a set of 3242 independent data with  $R(\text{int}) = 0.0490$  and a coverage of 99.8%.

The orthorhombic space group  $P2_12_12_1$  was determined by systematic absences and statistical tests and verified by subsequent refinement. The structure was solved by direct methods and refined by full-matrix least-squares methods on  $F^2$  [4,5]. The positions of hydrogens bonded to carbons were initially determined by geometry and were refined using a riding model. Non-hydrogen atoms were refined with anisotropic displacement parameters. Hydrogen atom displacement parameters were set to 1.2 times the isotropic equivalent displacement parameters of the bonded atoms. A total of 172 parameters were refined against 3242 data to give  $wR(F^2) = 0.0766$  and  $S = 1.007$  for weights of  $w = 1/[\sigma^2(F^2) + (0.0220 P)^2 + 0.4000 P]$ , where  $P = [Fo^2 + 2Fc^2] / 3$ . The final  $R(F)$  was 0.0352 for the 2932 observed,  $[F > 4\sigma(F)]$ , data. The largest shift/s.u. was 0.000 in the final refinement cycle. The final difference map had maxima and minima of 0.149 and -0.174 e/Å<sup>3</sup>, respectively. The absolute structure was determined by refinement of the Hooft parameter [7].

Thermal Ellipsoid Plot of Structure for **15d**

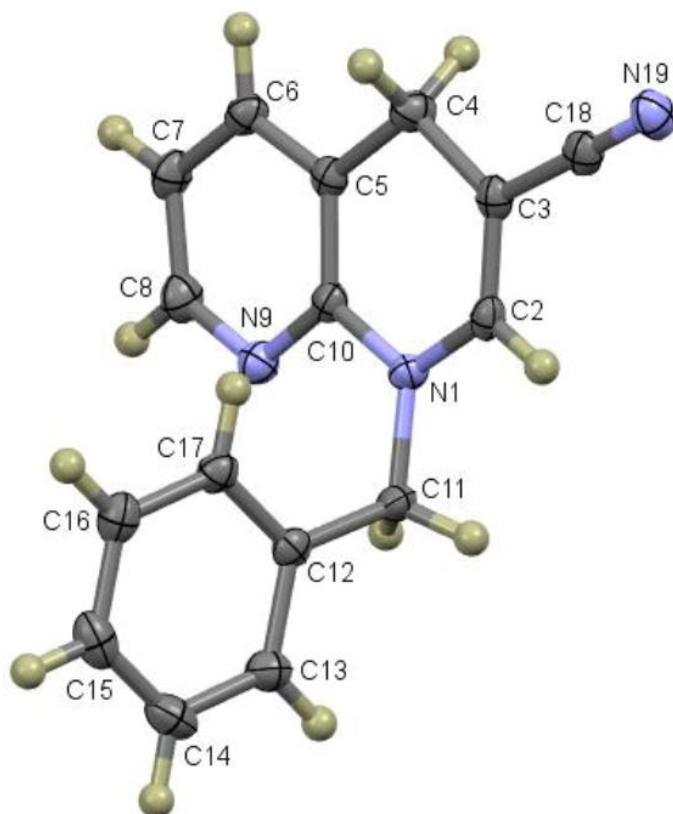

Table 1. Crystal data and structure refinement for 1-benzyl-1,4-dihydroquinoline-3-carbonitrile (**15d**, EB-1-UNK-Bn, CCDC 2035027).

|                                    |                                                |                     |
|------------------------------------|------------------------------------------------|---------------------|
| Empirical formula                  | C <sub>16</sub> H <sub>13</sub> N <sub>3</sub> |                     |
| Formula weight                     | 247.29                                         |                     |
| Crystal system                     | orthorhombic                                   |                     |
| Space group                        | P2 <sub>1</sub> 2 <sub>1</sub> 2 <sub>1</sub>  |                     |
| Unit cell dimensions               | $a = 6.1666(2) \text{ \AA}$                    | $\alpha = 90^\circ$ |
|                                    | $b = 14.1911(5) \text{ \AA}$                   | $\beta = 90^\circ$  |
|                                    | $c = 14.3040(5) \text{ \AA}$                   | $\gamma = 90^\circ$ |
| Volume                             | 1251.76(7) $\text{\AA}^3$                      |                     |
| Z, Z'                              | 4, 1                                           |                     |
| Density (calculated)               | 1.312 Mg/m <sup>3</sup>                        |                     |
| Wavelength                         | 0.71073 $\text{\AA}$                           |                     |
| Temperature                        | 100(2) K                                       |                     |
| $F(000)$                           | 520                                            |                     |
| Absorption coefficient             | 0.080 mm <sup>-1</sup>                         |                     |
| Absorption correction              | semi-empirical from equivalents                |                     |
| Max. and min. transmission         | 0.7458 and 0.6236                              |                     |
| Theta range for data collection    | 2.848 to 28.786°                               |                     |
| Reflections collected              | 21066                                          |                     |
| Independent reflections            | 3242 [R(int) = 0.0490]                         |                     |
| Data / restraints / parameters     | 3242 / 0 / 172                                 |                     |
| $wR(F^2 \text{ all data})$         | $wR2 = 0.0766$                                 |                     |
| $R(F \text{ obsd data})$           | $R1 = 0.0352$                                  |                     |
| Goodness-of-fit on $F^2$           | 1.007                                          |                     |
| Observed data [ $I > 2\sigma(I)$ ] | 2932                                           |                     |
| Absolute structure parameter       | -0.2(8)                                        |                     |
| Largest and mean shift / s.u.      | 0.000 and 0.000                                |                     |
| Largest diff. peak and hole        | 0.149 and -0.174 e/ $\text{\AA}^3$             |                     |

Table 2. Atomic coordinates and equivalent isotropic displacement parameters for EB-1-UNK-Bn.  $U(\text{eq})$  is defined as one third of the trace of the orthogonalized  $U_{ij}$  tensor.

|       | x         | y           | z           | $U(\text{eq})$ |
|-------|-----------|-------------|-------------|----------------|
| N(1)  | 0.4747(2) | 0.47351(10) | 0.40286(10) | 0.0212(3)      |
| C(2)  | 0.6301(3) | 0.40799(12) | 0.42218(12) | 0.0212(3)      |
| C(3)  | 0.8070(3) | 0.39319(12) | 0.36868(12) | 0.0213(3)      |
| C(4)  | 0.8535(3) | 0.44924(13) | 0.28136(12) | 0.0262(4)      |
| C(5)  | 0.6740(3) | 0.51879(12) | 0.26254(11) | 0.0196(3)      |
| C(6)  | 0.6822(3) | 0.57730(12) | 0.18511(12) | 0.0235(4)      |
| C(7)  | 0.5140(3) | 0.63979(13) | 0.16644(12) | 0.0259(4)      |
| C(8)  | 0.3415(3) | 0.64166(13) | 0.22777(13) | 0.0273(4)      |
| N(9)  | 0.3288(3) | 0.58799(11) | 0.30511(10) | 0.0246(3)      |
| C(10) | 0.4922(3) | 0.52853(12) | 0.32112(11) | 0.0200(3)      |
| C(11) | 0.3063(3) | 0.49375(12) | 0.47214(12) | 0.0230(4)      |
| C(12) | 0.3518(3) | 0.57988(12) | 0.53217(12) | 0.0211(3)      |
| C(13) | 0.1914(3) | 0.60788(13) | 0.59508(13) | 0.0266(4)      |
| C(14) | 0.2197(3) | 0.68820(15) | 0.64924(14) | 0.0328(4)      |
| C(15) | 0.4066(3) | 0.74173(14) | 0.64036(14) | 0.0314(4)      |
| C(16) | 0.5677(3) | 0.71390(13) | 0.57895(13) | 0.0277(4)      |
| C(17) | 0.5404(3) | 0.63256(13) | 0.52550(12) | 0.0228(4)      |
| C(18) | 0.9555(3) | 0.32150(13) | 0.39676(12) | 0.0239(4)      |
| N(19) | 1.0777(3) | 0.26444(11) | 0.41882(11) | 0.0305(4)      |

Table 3. Bond lengths [Å] and angles [°] for EB-1-UNK-Bn.

|                   |            |                     |            |
|-------------------|------------|---------------------|------------|
| N(1)-C(2)         | 1.363(2)   | C(8)-H(8)           | 0.9500     |
| N(1)-C(10)        | 1.410(2)   | N(9)-C(10)          | 1.334(2)   |
| N(1)-C(11)        | 1.464(2)   | C(11)-C(12)         | 1.520(2)   |
| C(2)-C(3)         | 1.349(2)   | C(11)-H(11A)        | 0.9900     |
| C(2)-H(2)         | 0.9500     | C(11)-H(11B)        | 0.9900     |
| C(3)-C(18)        | 1.427(2)   | C(12)-C(17)         | 1.386(2)   |
| C(3)-C(4)         | 1.508(2)   | C(12)-C(13)         | 1.395(2)   |
| C(4)-C(5)         | 1.508(2)   | C(13)-C(14)         | 1.389(3)   |
| C(4)-H(4A)        | 0.9900     | C(13)-H(13)         | 0.9500     |
| C(4)-H(4AB)       | 0.9900     | C(14)-C(15)         | 1.386(3)   |
| C(5)-C(6)         | 1.385(2)   | C(14)-H(14)         | 0.9500     |
| C(5)-C(10)        | 1.406(2)   | C(15)-C(16)         | 1.384(3)   |
| C(6)-C(7)         | 1.391(3)   | C(15)-H(15)         | 0.9500     |
| C(6)-H(6)         | 0.9500     | C(16)-C(17)         | 1.395(3)   |
| C(7)-C(8)         | 1.379(3)   | C(16)-H(16)         | 0.9500     |
| C(7)-H(7)         | 0.9500     | C(17)-H(17)         | 0.9500     |
| C(8)-N(9)         | 1.345(2)   | C(18)-N(19)         | 1.150(2)   |
| C(2)-N(1)-C(10)   | 119.47(14) | N(9)-C(8)-C(7)      | 123.86(18) |
| C(2)-N(1)-C(11)   | 119.67(14) | N(9)-C(8)-H(8)      | 118.1      |
| C(10)-N(1)-C(11)  | 120.46(14) | C(7)-C(8)-H(8)      | 118.1      |
| C(3)-C(2)-N(1)    | 124.01(15) | C(10)-N(9)-C(8)     | 117.09(16) |
| C(3)-C(2)-H(2)    | 118.0      | N(9)-C(10)-C(5)     | 124.18(15) |
| N(1)-C(2)-H(2)    | 118.0      | N(9)-C(10)-N(1)     | 115.78(15) |
| C(2)-C(3)-C(18)   | 118.06(16) | C(5)-C(10)-N(1)     | 120.04(15) |
| C(2)-C(3)-C(4)    | 122.80(16) | N(1)-C(11)-C(12)    | 114.17(14) |
| C(18)-C(3)-C(4)   | 119.14(16) | N(1)-C(11)-H(11A)   | 108.7      |
| C(5)-C(4)-C(3)    | 110.69(15) | C(12)-C(11)-H(11A)  | 108.7      |
| C(5)-C(4)-H(4A)   | 109.5      | N(1)-C(11)-H(11B)   | 108.7      |
| C(3)-C(4)-H(4A)   | 109.5      | C(12)-C(11)-H(11B)  | 108.7      |
| C(5)-C(4)-H(4AB)  | 109.5      | H(11A)-C(11)-H(11B) | 107.6      |
| C(3)-C(4)-H(4AB)  | 109.5      | C(17)-C(12)-C(13)   | 119.07(17) |
| H(4A)-C(4)-H(4AB) | 108.1      | C(17)-C(12)-C(11)   | 123.35(15) |
| C(6)-C(5)-C(10)   | 116.53(16) | C(13)-C(12)-C(11)   | 117.55(16) |
| C(6)-C(5)-C(4)    | 120.55(16) | C(14)-C(13)-C(12)   | 120.27(18) |
| C(10)-C(5)-C(4)   | 122.92(15) | C(14)-C(13)-H(13)   | 119.9      |
| C(5)-C(6)-C(7)    | 120.56(17) | C(12)-C(13)-H(13)   | 119.9      |
| C(5)-C(6)-H(6)    | 119.7      | C(15)-C(14)-C(13)   | 120.21(19) |
| C(7)-C(6)-H(6)    | 119.7      | C(15)-C(14)-H(14)   | 119.9      |
| C(8)-C(7)-C(6)    | 117.74(16) | C(13)-C(14)-H(14)   | 119.9      |
| C(8)-C(7)-H(7)    | 121.1      | C(16)-C(15)-C(14)   | 119.92(18) |
| C(6)-C(7)-H(7)    | 121.1      | C(16)-C(15)-H(15)   | 120.0      |

|                   |            |                   |            |
|-------------------|------------|-------------------|------------|
| C(14)-C(15)-H(15) | 120.0      | C(12)-C(17)-C(16) | 120.66(17) |
| C(15)-C(16)-C(17) | 119.84(19) | C(12)-C(17)-H(17) | 119.7      |
| C(15)-C(16)-H(16) | 120.1      | C(16)-C(17)-H(17) | 119.7      |
| C(17)-C(16)-H(16) | 120.1      | N(19)-C(18)-C(3)  | 179.0(2)   |

---

Table 4. Anisotropic displacement parameters ( $\text{\AA}^2 \times 10^3$ ) for EB-1-UNK-Bn. The anisotropic displacement factor exponent takes the form:

$$-2 \pi^2 [h^2 a^{*2} U_{11} + \dots + 2 h k a^* b^* U_{12}]$$

|       | $U_{11}$ | $U_{22}$ | $U_{33}$ | $U_{23}$ | $U_{13}$ | $U_{12}$ |
|-------|----------|----------|----------|----------|----------|----------|
| N(1)  | 26(1)    | 20(1)    | 17(1)    | 1(1)     | 4(1)     | 0(1)     |
| C(2)  | 30(1)    | 16(1)    | 17(1)    | 0(1)     | -3(1)    | -4(1)    |
| C(3)  | 28(1)    | 18(1)    | 18(1)    | -1(1)    | -4(1)    | -1(1)    |
| C(4)  | 28(1)    | 30(1)    | 21(1)    | 4(1)     | 2(1)     | 5(1)     |
| C(5)  | 23(1)    | 19(1)    | 17(1)    | -2(1)    | -2(1)    | -3(1)    |
| C(6)  | 28(1)    | 25(1)    | 17(1)    | 0(1)     | 1(1)     | -4(1)    |
| C(7)  | 34(1)    | 24(1)    | 20(1)    | 6(1)     | -4(1)    | -3(1)    |
| C(8)  | 30(1)    | 25(1)    | 26(1)    | 5(1)     | -4(1)    | 4(1)     |
| N(9)  | 27(1)    | 24(1)    | 23(1)    | 2(1)     | 0(1)     | 1(1)     |
| C(10) | 25(1)    | 18(1)    | 17(1)    | 0(1)     | 0(1)     | -3(1)    |
| C(11) | 25(1)    | 24(1)    | 21(1)    | 1(1)     | 5(1)     | -4(1)    |
| C(12) | 25(1)    | 21(1)    | 17(1)    | 4(1)     | 0(1)     | 2(1)     |
| C(13) | 25(1)    | 30(1)    | 25(1)    | 1(1)     | 3(1)     | 2(1)     |
| C(14) | 35(1)    | 36(1)    | 28(1)    | -5(1)    | 3(1)     | 11(1)    |
| C(15) | 42(1)    | 24(1)    | 28(1)    | -4(1)    | -10(1)   | 7(1)     |
| C(16) | 33(1)    | 24(1)    | 26(1)    | 2(1)     | -5(1)    | -5(1)    |
| C(17) | 26(1)    | 25(1)    | 18(1)    | 2(1)     | 1(1)     | -2(1)    |
| C(18) | 31(1)    | 21(1)    | 19(1)    | -3(1)    | -2(1)    | -2(1)    |
| N(19) | 39(1)    | 27(1)    | 26(1)    | 2(1)     | 0(1)     | 7(1)     |



Table 5. Hydrogen coordinates and isotropic displacement parameters for EB-1-UNK-Bn.

|        | x        | y        | z        | U(eq) |
|--------|----------|----------|----------|-------|
| H(2)   | 0.612701 | 0.370455 | 0.476662 | 0.025 |
| H(4A)  | 0.992419 | 0.483411 | 0.288797 | 0.031 |
| H(4AB) | 0.867954 | 0.405888 | 0.227490 | 0.031 |
| H(6)   | 0.803791 | 0.574721 | 0.144410 | 0.028 |
| H(7)   | 0.517750 | 0.679827 | 0.113240 | 0.031 |
| H(8)   | 0.224822 | 0.683300 | 0.214639 | 0.033 |
| H(11A) | 0.289970 | 0.438268 | 0.513499 | 0.028 |
| H(11B) | 0.166798 | 0.503150 | 0.439214 | 0.028 |
| H(13)  | 0.062213 | 0.571871 | 0.600909 | 0.032 |
| H(14)  | 0.110704 | 0.706507 | 0.692498 | 0.039 |
| H(15)  | 0.424092 | 0.797444 | 0.676395 | 0.038 |
| H(16)  | 0.696622 | 0.750117 | 0.573201 | 0.033 |
| H(17)  | 0.652263 | 0.613078 | 0.484104 | 0.027 |

Table 6. Torsion angles [°] for EB-1-UNK-Bn.

---

|                         |             |
|-------------------------|-------------|
| C(10)-N(1)-C(2)-C(3)    | 1.8(2)      |
| C(11)-N(1)-C(2)-C(3)    | -170.98(16) |
| N(1)-C(2)-C(3)-C(18)    | -179.37(16) |
| N(1)-C(2)-C(3)-C(4)     | 0.8(3)      |
| C(2)-C(3)-C(4)-C(5)     | -2.0(2)     |
| C(18)-C(3)-C(4)-C(5)    | 178.16(15)  |
| C(3)-C(4)-C(5)-C(6)     | -179.43(16) |
| C(3)-C(4)-C(5)-C(10)    | 0.8(2)      |
| C(10)-C(5)-C(6)-C(7)    | -1.9(2)     |
| C(4)-C(5)-C(6)-C(7)     | 178.36(16)  |
| C(5)-C(6)-C(7)-C(8)     | 0.5(3)      |
| C(6)-C(7)-C(8)-N(9)     | 1.3(3)      |
| C(7)-C(8)-N(9)-C(10)    | -1.4(3)     |
| C(8)-N(9)-C(10)-C(5)    | -0.1(3)     |
| C(8)-N(9)-C(10)-N(1)    | 179.76(15)  |
| C(6)-C(5)-C(10)-N(9)    | 1.7(2)      |
| C(4)-C(5)-C(10)-N(9)    | -178.50(16) |
| C(6)-C(5)-C(10)-N(1)    | -178.15(15) |
| C(4)-C(5)-C(10)-N(1)    | 1.6(2)      |
| C(2)-N(1)-C(10)-N(9)    | 177.11(15)  |
| C(11)-N(1)-C(10)-N(9)   | -10.1(2)    |
| C(2)-N(1)-C(10)-C(5)    | -3.0(2)     |
| C(11)-N(1)-C(10)-C(5)   | 169.74(15)  |
| C(2)-N(1)-C(11)-C(12)   | 97.36(18)   |
| C(10)-N(1)-C(11)-C(12)  | -75.4(2)    |
| N(1)-C(11)-C(12)-C(17)  | -2.9(2)     |
| N(1)-C(11)-C(12)-C(13)  | 175.32(16)  |
| C(17)-C(12)-C(13)-C(14) | 0.9(3)      |
| C(11)-C(12)-C(13)-C(14) | -177.45(16) |
| C(12)-C(13)-C(14)-C(15) | 0.8(3)      |
| C(13)-C(14)-C(15)-C(16) | -1.5(3)     |
| C(14)-C(15)-C(16)-C(17) | 0.6(3)      |
| C(13)-C(12)-C(17)-C(16) | -1.7(3)     |
| C(11)-C(12)-C(17)-C(16) | 176.48(17)  |
| C(15)-C(16)-C(17)-C(12) | 1.0(3)      |

---

Table 7. Hydrogen bonds for EB-1-UNK-Bn [ $\text{\AA}$  and  $^\circ$ ].

| D-H...A             | d(D-H) | d(H...A) | d(D...A) | <(DHA) |
|---------------------|--------|----------|----------|--------|
| C(2)-H(2)...N(19)#1 | 0.95   | 2.44     | 3.356(2) | 162.4  |

Symmetry transformations used to generate equivalent atoms:

#1  $x-1/2, -y+1/2, -z+1$

(Z)-2-((Benzylamino)methyl)-3-(2-fluoro-5-nitrophenyl)acrylonitrile (**16**, EB-1-INT-6, CCDC 2035028)

## Comment

The displacement ellipsoids were drawn at the 50% probability level.

## Experimental

A yellow, plate-shaped crystal of dimensions 0.028 x 0.152 x 0.248 mm was selected for structural analysis. Intensity data for this compound were collected using a D8 Quest  $\kappa$ -geometry diffractometer with a Bruker Photon II CMOS area detector [1,2] and an Incoatec I $\mu$ s microfocus Mo K $\alpha$  source ( $\lambda = 0.71073$  Å). The sample was cooled to 100(2) K. Cell parameters were determined from a least-squares fit of 7081 peaks in the range  $2.76 < \theta < 25.64^\circ$ . A total of 21764 data were measured in the range  $2.758 < \theta < 25.821^\circ$  using  $\phi$  and  $\omega$  oscillation frames. The data were corrected for absorption by the empirical method [3] giving minimum and maximum transmission factors of 0.5330 and 0.6463. The data were merged to form a set of 2763 independent data with  $R(\text{int}) = 0.0762$  and a coverage of 99.9%.

The monoclinic space group  $Cc$  was determined by systematic absences and statistical tests and verified by subsequent refinement. The structure was solved by dual-space methods and refined by full-matrix least-squares methods on  $F^2$  [4,5]. The positions of hydrogens bonded to carbons were initially determined by geometry and were refined using a riding model. The hydrogens bonded to N3 was located on a difference map, and its position was refined independently. Non-hydrogen atoms were refined with anisotropic displacement parameters. Hydrogen atom displacement parameters were set to 1.2 times the isotropic equivalent displacement parameters of the bonded atoms. A total of 212 parameters were refined against 2 space group restraints and 2763 data to give  $wR(F^2) = 0.1163$  and  $S = 1.046$  for weights of  $w = 1/[\sigma^2(F^2) + (0.0600 P)^2 + 0.8600 P]$ , where  $P = [Fo^2 + 2Fc^2] / 3$ . The final  $R(F)$  was 0.0462 for the 2261 observed,  $[F > 4\sigma(F)]$ , data. The largest shift/s.u. was 0.000 in the final refinement cycle. The final difference map had maxima and minima of 0.241 and -0.229 e/Å<sup>3</sup>, respectively. The absolute structure could not be determined by refinement of the Flack parameter [6].

Thermal Elipsoid Plot of Structure **16**

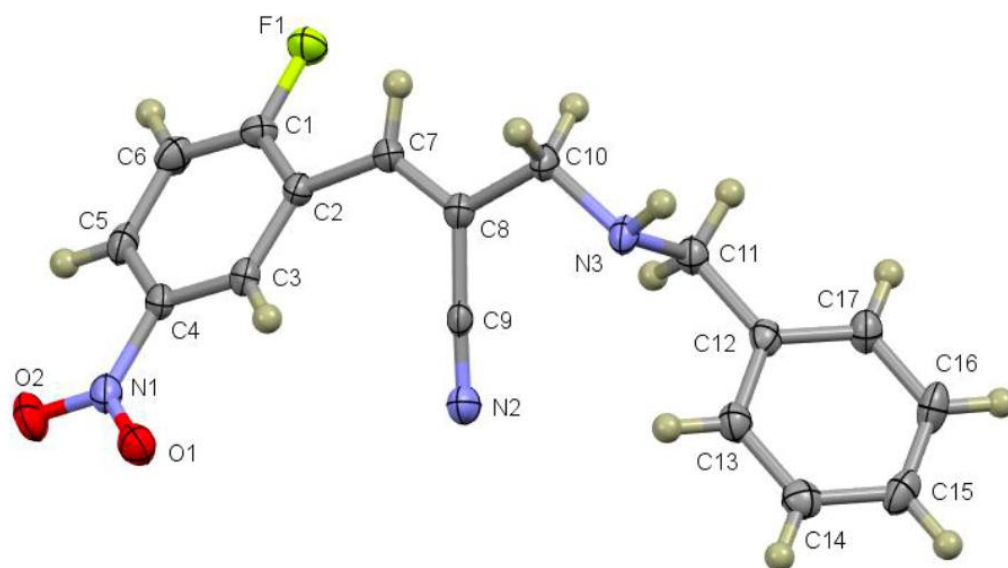

Table 1. Crystal data and structure refinement for (Z)-2-((benzylamino)methyl)-3-(2-fluoro-5-nitrophenyl)acrylonitrile (**16**, EB-1-INT-6, CCDC 2035028).

|                                                                  |                                                                                             |                                                                          |
|------------------------------------------------------------------|---------------------------------------------------------------------------------------------|--------------------------------------------------------------------------|
| Empirical formula                                                | C <sub>17</sub> H <sub>14</sub> F N <sub>3</sub> O <sub>2</sub>                             |                                                                          |
| Formula weight                                                   | 311.31                                                                                      |                                                                          |
| Crystal system                                                   | monoclinic                                                                                  |                                                                          |
| Space group                                                      | Cc                                                                                          |                                                                          |
| Unit cell dimensions                                             | $a = 6.5638(10) \text{ \AA}$<br>$b = 29.540(5) \text{ \AA}$<br>$c = 7.6292(13) \text{ \AA}$ | $\alpha = 90^\circ$<br>$\beta = 102.722(5)^\circ$<br>$\gamma = 90^\circ$ |
| Volume                                                           | 1442.9(4) $\text{\AA}^3$                                                                    |                                                                          |
| Z, Z'                                                            | 4, 1                                                                                        |                                                                          |
| Density (calculated)                                             | 1.433 Mg/m <sup>3</sup>                                                                     |                                                                          |
| Wavelength                                                       | 0.71073 $\text{\AA}$                                                                        |                                                                          |
| Temperature                                                      | 100(2) K                                                                                    |                                                                          |
| $F(000)$                                                         | 648                                                                                         |                                                                          |
| Absorption coefficient                                           | 0.105 mm <sup>-1</sup>                                                                      |                                                                          |
| Absorption correction                                            | semi-empirical from equivalents                                                             |                                                                          |
| Max. and min. transmission                                       | 0.6463 and 0.5330                                                                           |                                                                          |
| Theta range for data collection                                  | 2.758 to 25.821°                                                                            |                                                                          |
| Reflections collected                                            | 21764                                                                                       |                                                                          |
| Independent reflections                                          | 2763 [R(int) = 0.0762]                                                                      |                                                                          |
| Data / restraints / parameters                                   | 2763 / 2 / 212                                                                              |                                                                          |
| $wR(F^2 \text{ all data})$                                       | $wR2 = 0.1163$                                                                              |                                                                          |
| $R(F \text{ obsd data})$                                         | $R1 = 0.0462$                                                                               |                                                                          |
| Goodness-of-fit on $F^2$                                         | 1.046                                                                                       |                                                                          |
| Observed data [ $I > 2\sigma(I)$ ]                               | 2261                                                                                        |                                                                          |
| Absolute structure parameter                                     | -0.1(7)                                                                                     |                                                                          |
| Extinction coefficient                                           | 0.013(2)                                                                                    |                                                                          |
| Largest and mean shift / s.u.                                    | 0.000 and 0.000                                                                             |                                                                          |
| Largest diff. peak and hole                                      | 0.241 and -0.229 e/ $\text{\AA}^3$                                                          |                                                                          |
| -----                                                            |                                                                                             |                                                                          |
| $wR2 = \{ \Sigma[w(F_o2 - F_c2)^2] / \Sigma[w(F_o2)^2] \}^{1/2}$ |                                                                                             |                                                                          |
| $R1 = \Sigma   F_o  -  F_c   / \Sigma  F_o $                     |                                                                                             |                                                                          |

Table 2. Atomic coordinates and equivalent isotropic displacement parameters for EB-1-INT-6.  $U(\text{eq})$  is defined as one third of the trace of the orthogonalized  $U_{ij}$  tensor.

|       | x          | y           | z         | $U(\text{eq})$ |
|-------|------------|-------------|-----------|----------------|
| F(1)  | -0.0126(4) | 0.60772(8)  | 0.3358(4) | 0.0319(7)      |
| O(1)  | 0.9058(5)  | 0.54806(11) | 0.6265(5) | 0.0335(8)      |
| O(2)  | 0.7879(5)  | 0.49044(10) | 0.4594(5) | 0.0408(9)      |
| N(1)  | 0.7638(6)  | 0.52817(12) | 0.5233(5) | 0.0283(9)      |
| N(2)  | 0.7929(6)  | 0.69387(12) | 0.5406(6) | 0.0303(9)      |
| N(3)  | 0.5005(6)  | 0.77335(11) | 0.6854(5) | 0.0242(8)      |
| C(1)  | 0.1789(7)  | 0.58866(14) | 0.3822(6) | 0.0253(10)     |
| C(2)  | 0.3378(6)  | 0.61292(13) | 0.4932(6) | 0.0227(10)     |
| C(3)  | 0.5324(7)  | 0.59176(14) | 0.5399(6) | 0.0244(10)     |
| C(4)  | 0.5585(7)  | 0.54932(13) | 0.4720(6) | 0.0228(9)      |
| C(5)  | 0.3987(7)  | 0.52601(14) | 0.3596(6) | 0.0280(11)     |
| C(6)  | 0.2034(7)  | 0.54618(15) | 0.3144(7) | 0.0295(11)     |
| C(7)  | 0.2920(7)  | 0.65763(13) | 0.5595(6) | 0.0232(9)      |
| C(8)  | 0.4216(6)  | 0.69304(14) | 0.6024(6) | 0.0225(9)      |
| C(9)  | 0.6294(7)  | 0.69282(12) | 0.5714(6) | 0.0221(9)      |
| C(10) | 0.3513(7)  | 0.73599(13) | 0.6815(7) | 0.0257(10)     |
| C(11) | 0.4777(7)  | 0.79601(13) | 0.5127(6) | 0.0247(10)     |
| C(12) | 0.6472(7)  | 0.83085(14) | 0.5184(6) | 0.0227(9)      |
| C(13) | 0.8526(7)  | 0.82210(14) | 0.6069(6) | 0.0269(10)     |
| C(14) | 1.0095(7)  | 0.85372(15) | 0.6089(6) | 0.0291(10)     |
| C(15) | 0.9624(8)  | 0.89512(14) | 0.5209(7) | 0.0323(11)     |
| C(16) | 0.7594(8)  | 0.90415(15) | 0.4344(7) | 0.0334(11)     |
| C(17) | 0.6032(7)  | 0.87252(14) | 0.4333(7) | 0.0278(10)     |

Table 3. Bond lengths [Å] and angles [°] for EB-1-INT-6.

|                  |          |                     |          |
|------------------|----------|---------------------|----------|
| F(1)-C(1)        | 1.351(5) | C(7)-H(7)           | 0.9500   |
| O(1)-N(1)        | 1.229(5) | C(8)-C(9)           | 1.435(6) |
| O(2)-N(1)        | 1.241(5) | C(8)-C(10)          | 1.519(6) |
| N(1)-C(4)        | 1.458(5) | C(10)-H(10A)        | 0.9900   |
| N(2)-C(9)        | 1.149(6) | C(10)-H(10B)        | 0.9900   |
| N(3)-C(11)       | 1.456(6) | C(11)-C(12)         | 1.509(6) |
| N(3)-C(10)       | 1.471(5) | C(11)-H(11A)        | 0.9900   |
| N(3)-H(3N)       | 0.96(5)  | C(11)-H(11B)        | 0.9900   |
| C(1)-C(6)        | 1.380(6) | C(12)-C(17)         | 1.392(6) |
| C(1)-C(2)        | 1.389(6) | C(12)-C(13)         | 1.392(6) |
| C(2)-C(3)        | 1.396(6) | C(13)-C(14)         | 1.388(7) |
| C(2)-C(7)        | 1.469(5) | C(13)-H(13)         | 0.9500   |
| C(3)-C(4)        | 1.382(6) | C(14)-C(15)         | 1.396(7) |
| C(3)-H(3)        | 0.9500   | C(14)-H(14)         | 0.9500   |
| C(4)-C(5)        | 1.383(6) | C(15)-C(16)         | 1.377(7) |
| C(5)-C(6)        | 1.387(7) | C(15)-H(15)         | 0.9500   |
| C(5)-H(5)        | 0.9500   | C(16)-C(17)         | 1.386(6) |
| C(6)-H(6)        | 0.9500   | C(16)-H(16)         | 0.9500   |
| C(7)-C(8)        | 1.342(6) | C(17)-H(17)         | 0.9500   |
| O(1)-N(1)-O(2)   | 122.5(4) | C(1)-C(6)-H(6)      | 120.8    |
| O(1)-N(1)-C(4)   | 119.5(3) | C(5)-C(6)-H(6)      | 120.8    |
| O(2)-N(1)-C(4)   | 118.0(4) | C(8)-C(7)-C(2)      | 128.2(4) |
| C(11)-N(3)-C(10) | 113.1(4) | C(8)-C(7)-H(7)      | 115.9    |
| C(11)-N(3)-H(3N) | 109(3)   | C(2)-C(7)-H(7)      | 115.9    |
| C(10)-N(3)-H(3N) | 105(3)   | C(7)-C(8)-C(9)      | 122.0(4) |
| F(1)-C(1)-C(6)   | 117.3(4) | C(7)-C(8)-C(10)     | 121.1(4) |
| F(1)-C(1)-C(2)   | 118.3(4) | C(9)-C(8)-C(10)     | 116.9(3) |
| C(6)-C(1)-C(2)   | 124.3(4) | N(2)-C(9)-C(8)      | 177.1(5) |
| C(1)-C(2)-C(3)   | 116.5(4) | N(3)-C(10)-C(8)     | 112.0(3) |
| C(1)-C(2)-C(7)   | 119.4(4) | N(3)-C(10)-H(10A)   | 109.2    |
| C(3)-C(2)-C(7)   | 124.0(4) | C(8)-C(10)-H(10A)   | 109.2    |
| C(4)-C(3)-C(2)   | 119.5(4) | N(3)-C(10)-H(10B)   | 109.2    |
| C(4)-C(3)-H(3)   | 120.2    | C(8)-C(10)-H(10B)   | 109.2    |
| C(2)-C(3)-H(3)   | 120.2    | H(10A)-C(10)-H(10B) | 107.9    |
| C(3)-C(4)-C(5)   | 123.0(4) | N(3)-C(11)-C(12)    | 111.1(3) |
| C(3)-C(4)-N(1)   | 118.1(4) | N(3)-C(11)-H(11A)   | 109.4    |
| C(5)-C(4)-N(1)   | 118.9(4) | C(12)-C(11)-H(11A)  | 109.4    |
| C(4)-C(5)-C(6)   | 118.3(4) | N(3)-C(11)-H(11B)   | 109.4    |
| C(4)-C(5)-H(5)   | 120.9    | C(12)-C(11)-H(11B)  | 109.4    |
| C(6)-C(5)-H(5)   | 120.9    | H(11A)-C(11)-H(11B) | 108.0    |
| C(1)-C(6)-C(5)   | 118.3(4) | C(17)-C(12)-C(13)   | 118.0(4) |



|                   |          |                   |          |
|-------------------|----------|-------------------|----------|
| C(17)-C(12)-C(11) | 120.9(4) | C(16)-C(15)-H(15) | 120.4    |
| C(13)-C(12)-C(11) | 121.1(4) | C(14)-C(15)-H(15) | 120.4    |
| C(14)-C(13)-C(12) | 121.2(4) | C(15)-C(16)-C(17) | 120.6(4) |
| C(14)-C(13)-H(13) | 119.4    | C(15)-C(16)-H(16) | 119.7    |
| C(12)-C(13)-H(13) | 119.4    | C(17)-C(16)-H(16) | 119.7    |
| C(13)-C(14)-C(15) | 119.9(4) | C(16)-C(17)-C(12) | 121.1(4) |
| C(13)-C(14)-H(14) | 120.0    | C(16)-C(17)-H(17) | 119.5    |
| C(15)-C(14)-H(14) | 120.0    | C(12)-C(17)-H(17) | 119.5    |
| C(16)-C(15)-C(14) | 119.3(4) |                   |          |

---

Table 4. Anisotropic displacement parameters ( $\text{\AA}^2 \times 10^3$ ) for EB-1-INT-6. The anisotropic displacement factor exponent takes the form:  
 $-2 \pi^2 [h^2 a^{*2} U_{11} + \dots + 2 h k a^* b^* U_{12}]$

|       | $U_{11}$ | $U_{22}$ | $U_{33}$ | $U_{23}$ | $U_{13}$ | $U_{12}$ |
|-------|----------|----------|----------|----------|----------|----------|
| F(1)  | 21(1)    | 29(1)    | 43(2)    | 0(1)     | 1(1)     | 1(1)     |
| O(1)  | 29(2)    | 27(2)    | 41(2)    | 1(2)     | 2(2)     | 3(1)     |
| O(2)  | 44(2)    | 20(2)    | 59(3)    | -6(2)    | 11(2)    | 7(1)     |
| N(1)  | 33(2)    | 19(2)    | 36(2)    | 2(2)     | 13(2)    | 1(2)     |
| N(2)  | 27(2)    | 20(2)    | 44(3)    | -2(2)    | 9(2)     | 0(2)     |
| N(3)  | 31(2)    | 16(2)    | 27(2)    | 0(2)     | 9(2)     | -1(2)    |
| C(1)  | 18(2)    | 26(2)    | 31(3)    | 2(2)     | 5(2)     | -1(2)    |
| C(2)  | 23(2)    | 16(2)    | 30(3)    | 0(2)     | 10(2)    | -2(2)    |
| C(3)  | 27(2)    | 17(2)    | 30(3)    | 3(2)     | 7(2)     | -1(2)    |
| C(4)  | 25(2)    | 16(2)    | 28(3)    | 5(2)     | 8(2)     | 1(2)     |
| C(5)  | 35(3)    | 17(2)    | 33(3)    | 1(2)     | 9(2)     | -5(2)    |
| C(6)  | 27(2)    | 25(2)    | 35(3)    | -2(2)    | 3(2)     | -7(2)    |
| C(7)  | 21(2)    | 18(2)    | 31(3)    | 3(2)     | 7(2)     | 1(2)     |
| C(8)  | 23(2)    | 17(2)    | 27(2)    | 2(2)     | 5(2)     | 0(2)     |
| C(9)  | 26(2)    | 12(2)    | 28(2)    | 2(2)     | 4(2)     | 0(2)     |
| C(10) | 30(2)    | 14(2)    | 35(3)    | -1(2)    | 13(2)    | -2(2)    |
| C(11) | 27(2)    | 19(2)    | 27(3)    | 1(2)     | 4(2)     | 0(2)     |
| C(12) | 28(2)    | 18(2)    | 24(3)    | -3(2)    | 9(2)     | 0(2)     |
| C(13) | 28(2)    | 20(2)    | 32(3)    | -1(2)    | 6(2)     | 1(2)     |
| C(14) | 30(2)    | 29(2)    | 29(3)    | -4(2)    | 9(2)     | 1(2)     |
| C(15) | 41(3)    | 22(2)    | 35(3)    | -4(2)    | 12(2)    | -10(2)   |
| C(16) | 48(3)    | 17(2)    | 34(3)    | 1(2)     | 6(2)     | -8(2)    |
| C(17) | 33(3)    | 20(2)    | 28(3)    | 2(2)     | 2(2)     | 0(2)     |

Table 5. Hydrogen coordinates and isotropic displacement parameters for EB-1-INT-6.

|        | x        | y          | z        | U(eq) |
|--------|----------|------------|----------|-------|
| H(3N)  | 0.469(7) | 0.7944(16) | 0.771(7) | 0.029 |
| H(3)   | 0.646092 | 0.606443   | 0.617769 | 0.029 |
| H(5)   | 0.422162 | 0.496935   | 0.314607 | 0.034 |
| H(6)   | 0.089185 | 0.531124   | 0.238681 | 0.035 |
| H(7)   | 0.153256 | 0.662035   | 0.573902 | 0.028 |
| H(10A) | 0.213181 | 0.745193   | 0.609248 | 0.031 |
| H(10B) | 0.335582 | 0.729775   | 0.805392 | 0.031 |
| H(11A) | 0.339540 | 0.810970   | 0.480911 | 0.030 |
| H(11B) | 0.484475 | 0.773321   | 0.418620 | 0.030 |
| H(13)  | 0.885882 | 0.793997   | 0.666876 | 0.032 |
| H(14)  | 1.148708 | 0.847212   | 0.670148 | 0.035 |
| H(15)  | 1.069233 | 0.916799   | 0.520820 | 0.039 |
| H(16)  | 0.726100 | 0.932310   | 0.374789 | 0.040 |
| H(17)  | 0.463777 | 0.879395   | 0.373575 | 0.033 |

Table 6. Torsion angles [°] for EB-1-INT-6.

---

|                         |           |
|-------------------------|-----------|
| F(1)-C(1)-C(2)-C(3)     | 179.1(4)  |
| C(6)-C(1)-C(2)-C(3)     | -1.3(7)   |
| F(1)-C(1)-C(2)-C(7)     | 1.4(6)    |
| C(6)-C(1)-C(2)-C(7)     | -179.0(4) |
| C(1)-C(2)-C(3)-C(4)     | 1.5(6)    |
| C(7)-C(2)-C(3)-C(4)     | 179.1(4)  |
| C(2)-C(3)-C(4)-C(5)     | -0.7(7)   |
| C(2)-C(3)-C(4)-N(1)     | 180.0(4)  |
| O(1)-N(1)-C(4)-C(3)     | 1.1(6)    |
| O(2)-N(1)-C(4)-C(3)     | -178.6(4) |
| O(1)-N(1)-C(4)-C(5)     | -178.3(4) |
| O(2)-N(1)-C(4)-C(5)     | 2.0(6)    |
| C(3)-C(4)-C(5)-C(6)     | -0.4(6)   |
| N(1)-C(4)-C(5)-C(6)     | 178.9(4)  |
| F(1)-C(1)-C(6)-C(5)     | 179.8(4)  |
| C(2)-C(1)-C(6)-C(5)     | 0.2(7)    |
| C(4)-C(5)-C(6)-C(1)     | 0.7(6)    |
| C(1)-C(2)-C(7)-C(8)     | -150.8(5) |
| C(3)-C(2)-C(7)-C(8)     | 31.7(7)   |
| C(2)-C(7)-C(8)-C(9)     | 6.1(8)    |
| C(2)-C(7)-C(8)-C(10)    | -175.8(4) |
| C(11)-N(3)-C(10)-C(8)   | 80.4(5)   |
| C(7)-C(8)-C(10)-N(3)    | -168.8(4) |
| C(9)-C(8)-C(10)-N(3)    | 9.5(6)    |
| C(10)-N(3)-C(11)-C(12)  | -174.3(3) |
| N(3)-C(11)-C(12)-C(17)  | -140.0(4) |
| N(3)-C(11)-C(12)-C(13)  | 40.8(5)   |
| C(17)-C(12)-C(13)-C(14) | -0.6(7)   |
| C(11)-C(12)-C(13)-C(14) | 178.6(4)  |
| C(12)-C(13)-C(14)-C(15) | -0.1(7)   |
| C(13)-C(14)-C(15)-C(16) | 0.6(7)    |
| C(14)-C(15)-C(16)-C(17) | -0.4(7)   |
| C(15)-C(16)-C(17)-C(12) | -0.4(7)   |
| C(13)-C(12)-C(17)-C(16) | 0.9(7)    |
| C(11)-C(12)-C(17)-C(16) | -178.3(4) |

---

Table 7. Hydrogen bonds for EB-1-INT-6 [ $\text{\AA}$  and  $^\circ$ ].

| D-H...A             | d(D-H)  | d(H...A) | d(D...A) | <(DHA) |
|---------------------|---------|----------|----------|--------|
| N(3)-H(3N)...N(2)#1 | 0.96(5) | 2.59(5)  | 3.430(6) | 146(4) |
| C(6)-H(6)...O(2)#2  | 0.95    | 2.65     | 3.562(6) | 162.2  |

Symmetry transformations used to generate equivalent atoms:

#1  $x-1/2, -y+3/2, z+1/2$     #2  $x-1, -y+1, z-1/2$

Ethyl 6-fluoro-4-oxo-1-phenethyl-1,4-dihydroquinoline-3-carboxylate (**19e** KEVJAG-1-64, CCDC 2057847)

## Comment

The displacement ellipsoids were drawn at the 50% probability level.

## Experimental

A colorless, block-shaped crystal of dimensions 0.106 x 0.272 x 0.280 mm was selected for structural analysis. Intensity data for this compound were collected using a D8 Quest  $\kappa$ -geometry diffractometer with a Bruker Photon II CMOS area detector [1,2] and an Incoatec I $\mu$ s microfocus Mo K $\alpha$  source ( $\lambda = 0.71073$  Å). The sample was cooled to 110(2) K. Cell parameters were determined from a least-squares fit of 9898 peaks in the range  $2.91 < \theta < 32.61^\circ$ . A total of 39073 data were measured in the range  $2.468 < \theta < 32.644^\circ$  using  $\phi$  and  $\omega$  oscillation frames. The data were corrected for absorption by the empirical method [3] giving minimum and maximum transmission factors of 0.7806 and 0.8623. The data were merged to form a set of 6040 independent data with  $R(\text{int}) = 0.0288$  and a coverage of 99.9 %.

The orthorhombic space group  $P2_12_12_1$  was determined by systematic absences and statistical tests and verified by subsequent refinement. The structure was solved by direct methods and refined by full-matrix least-squares methods on  $F^2$  [4,5]. The positions of hydrogens were initially determined by geometry and were refined using a riding model. Non-hydrogen atoms were refined with anisotropic displacement parameters. Hydrogen atom displacement parameters were set to 1.2 (1.5 for methyl) times the isotropic equivalent displacement parameters of the bonded atoms. A total of 227 parameters were refined against 6040 data to give  $wR(F^2) = 0.0896$  and  $S = 1.005$  for weights of  $w = 1/[\sigma^2(F^2) + (0.0580 P)^2 + 0.2000 P]$ , where  $P = [Fo^2 + 2Fc^2] / 3$ . The final  $R(F)$  was 0.0322 for the 5695 observed,  $[F > 4 \sigma(F)]$ , data. The largest shift/s.u. was 0.000 in the final refinement cycle. The final difference map had maxima and minima of 0.357 and -0.192 e/Å<sup>3</sup>, respectively. The absolute structure was determined by refinement of the Hooft parameter [8], Hooft  $y = 0.21(12)$ ,  $P2(\text{true}) = 1.000$ ,  $P3(\text{true}) = 0.816$ ,  $P3(\text{rac-twin}) = 0.184$ ,  $P3(\text{false}) = 0.2E-08$ .

Thermal Ellipsoid Plot of **19e**

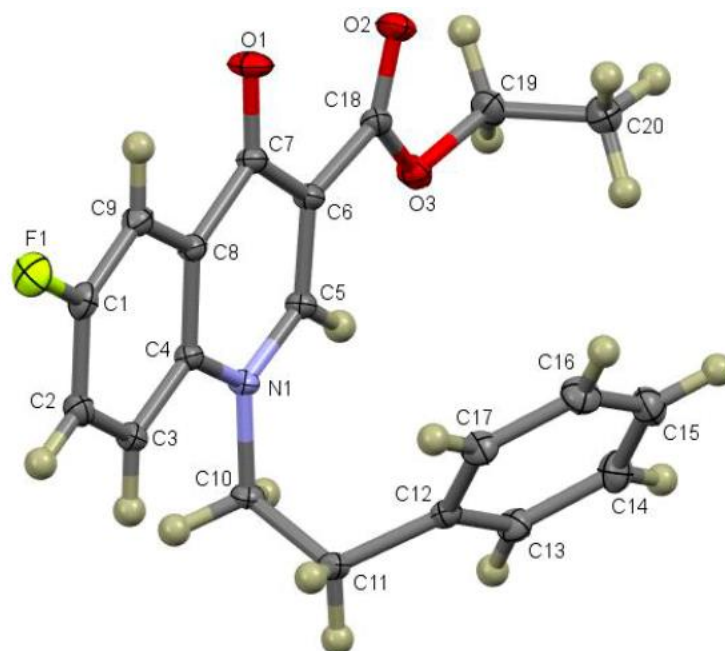

Table 1. Crystal data and structure refinement for ethyl 6-fluoro-4-oxo-1-phenethyl-1,4-dihydroquinoline-3-carboxylate (**19e**, KEVJAG-1-64, CCDC 2057847).

|                                                                   |                                                                |                     |
|-------------------------------------------------------------------|----------------------------------------------------------------|---------------------|
| Empirical formula                                                 | C <sub>20</sub> H <sub>18</sub> FN <sub>3</sub> O <sub>3</sub> |                     |
| Formula weight                                                    | 339.35                                                         |                     |
| Crystal system                                                    | orthorhombic                                                   |                     |
| Space group                                                       | P2 <sub>1</sub> 2 <sub>1</sub> 2 <sub>1</sub>                  |                     |
| Unit cell dimensions                                              | $a = 5.5713(2) \text{ \AA}$                                    | $\alpha = 90^\circ$ |
|                                                                   | $b = 14.9835(4) \text{ \AA}$                                   | $\beta = 90^\circ$  |
|                                                                   | $c = 19.7736(5) \text{ \AA}$                                   | $\gamma = 90^\circ$ |
| Volume                                                            | 650.65(8) $\text{\AA}^3$                                       |                     |
| Z, Z'                                                             | 4, 1                                                           |                     |
| Density (calculated)                                              | 1.366 Mg/m <sup>3</sup>                                        |                     |
| Wavelength                                                        | 0.71073 $\text{\AA}$                                           |                     |
| Temperature                                                       | 110(2) K                                                       |                     |
| $F(000)$                                                          | 712                                                            |                     |
| Absorption coefficient                                            | 0.099 mm <sup>-1</sup>                                         |                     |
| Absorption correction                                             | semi-empirical from equivalents                                |                     |
| Max. and min. transmission                                        | 0.8623 and 0.7806                                              |                     |
| Theta range for data collection                                   | 2.468 to 32.644°                                               |                     |
| Reflections collected                                             | 39073                                                          |                     |
| Independent reflections                                           | 6040 [R(int) = 0.0288]                                         |                     |
| Data / restraints / parameters                                    | 6040 / 0 / 227                                                 |                     |
| $wR(F^2 \text{ all data})$                                        | $wR2 = 0.0896$                                                 |                     |
| $R(F \text{ obsd data})$                                          | $R1 = 0.0322$                                                  |                     |
| Goodness-of-fit on $F^2$                                          | 1.005                                                          |                     |
| Observed data [ $I > 2\sigma(I)$ ]                                | 5695                                                           |                     |
| Absolute structure parameter                                      | 0.29(13)                                                       |                     |
| Extinction coefficient                                            | 0.013(2)                                                       |                     |
| Largest and mean shift / s.u.                                     | 0.000 and 0.000                                                |                     |
| Largest diff. peak and hole                                       | 0.357 and -0.192 e/ $\text{\AA}^3$                             |                     |
| -----                                                             |                                                                |                     |
| $wR2 = \{ \Sigma[w(F_o^2 - F_c^2)^2] / \Sigma[w(F_o^2)] \}^{1/2}$ |                                                                |                     |
| $R1 = \Sigma   F_o  -  F_c   / \Sigma  F_o $                      |                                                                |                     |



Table 2. Atomic coordinates and equivalent isotropic displacement parameters for KEVJAG-1-64.  $U(\text{eq})$  is defined as one third of the trace of the orthogonalized  $U_{ij}$  tensor.

|       | x           | y          | z          | $U(\text{eq})$ |
|-------|-------------|------------|------------|----------------|
| F(1)  | 1.40527(15) | 0.51268(6) | 0.13182(4) | 0.02518(17)    |
| O(1)  | 0.83616(19) | 0.32814(6) | 0.26570(5) | 0.0241(2)      |
| O(2)  | 0.4676(2)   | 0.28816(6) | 0.36053(5) | 0.0253(2)      |
| O(3)  | 0.22921(17) | 0.40520(6) | 0.38484(5) | 0.01994(18)    |
| N(1)  | 0.60123(18) | 0.58733(6) | 0.28431(5) | 0.01392(17)    |
| C(1)  | 1.2051(2)   | 0.53118(8) | 0.16864(6) | 0.0178(2)      |
| C(2)  | 1.1310(2)   | 0.61959(8) | 0.17376(6) | 0.0179(2)      |
| C(3)  | 0.9293(2)   | 0.63859(7) | 0.21193(6) | 0.0165(2)      |
| C(4)  | 0.8050(2)   | 0.56957(7) | 0.24507(5) | 0.01350(18)    |
| C(5)  | 0.4932(2)   | 0.52046(7) | 0.31744(6) | 0.01432(19)    |
| C(6)  | 0.5600(2)   | 0.43207(7) | 0.31470(6) | 0.01496(19)    |
| C(7)  | 0.7637(2)   | 0.40551(7) | 0.27365(6) | 0.0155(2)      |
| C(8)  | 0.8851(2)   | 0.48092(7) | 0.23940(6) | 0.01425(19)    |
| C(9)  | 1.0886(2)   | 0.46228(8) | 0.20000(6) | 0.0169(2)      |
| C(10) | 0.5137(2)   | 0.67913(7) | 0.29476(6) | 0.01584(19)    |
| C(11) | 0.6580(2)   | 0.72932(7) | 0.34897(6) | 0.0172(2)      |
| C(12) | 0.6691(2)   | 0.67848(7) | 0.41471(6) | 0.01520(19)    |
| C(13) | 0.4835(2)   | 0.68335(8) | 0.46163(6) | 0.0184(2)      |
| C(14) | 0.4897(2)   | 0.63222(9) | 0.52050(7) | 0.0221(2)      |
| C(15) | 0.6833(3)   | 0.57615(9) | 0.53343(7) | 0.0235(2)      |
| C(16) | 0.8705(2)   | 0.57144(9) | 0.48726(7) | 0.0236(2)      |
| C(17) | 0.8624(2)   | 0.62199(8) | 0.42812(6) | 0.0195(2)      |
| C(18) | 0.4205(2)   | 0.36674(7) | 0.35465(6) | 0.0171(2)      |
| C(19) | 0.0901(3)   | 0.34871(9) | 0.42981(7) | 0.0243(3)      |
| C(20) | 0.2063(3)   | 0.34486(9) | 0.49878(7) | 0.0278(3)      |

Table 3. Bond lengths [Å] and angles [°] for KEVJAG-1-64.

|                  |            |                    |            |
|------------------|------------|--------------------|------------|
| F(1)-C(1)        | 1.3605(14) | C(10)-H(10A)       | 0.9900     |
| O(1)-C(7)        | 1.2377(13) | C(10)-H(10B)       | 0.9900     |
| O(2)-C(18)       | 1.2120(14) | C(11)-C(12)        | 1.5078(16) |
| O(3)-C(18)       | 1.3505(15) | C(11)-H(11A)       | 0.9900     |
| O(3)-C(19)       | 1.4519(15) | C(11)-H(11B)       | 0.9900     |
| N(1)-C(5)        | 1.3398(14) | C(12)-C(13)        | 1.3915(16) |
| N(1)-C(4)        | 1.4005(14) | C(12)-C(17)        | 1.3952(16) |
| N(1)-C(10)       | 1.4738(13) | C(13)-C(14)        | 1.3940(18) |
| C(1)-C(9)        | 1.3680(17) | C(13)-H(13)        | 0.9500     |
| C(1)-C(2)        | 1.3911(16) | C(14)-C(15)        | 1.3908(19) |
| C(2)-C(3)        | 1.3835(17) | C(14)-H(14)        | 0.9500     |
| C(2)-H(2)        | 0.9500     | C(15)-C(16)        | 1.3879(19) |
| C(3)-C(4)        | 1.4068(15) | C(15)-H(15)        | 0.9500     |
| C(3)-H(3)        | 0.9500     | C(16)-C(17)        | 1.3939(18) |
| C(4)-C(8)        | 1.4058(14) | C(16)-H(16)        | 0.9500     |
| C(5)-C(6)        | 1.3768(14) | C(17)-H(17)        | 0.9500     |
| C(5)-H(5)        | 0.9500     | C(19)-C(20)        | 1.511(2)   |
| C(6)-C(7)        | 1.4507(16) | C(19)-H(19A)       | 0.9900     |
| C(6)-C(18)       | 1.4788(15) | C(19)-H(19B)       | 0.9900     |
| C(7)-C(8)        | 1.4810(15) | C(20)-H(20A)       | 0.9800     |
| C(8)-C(9)        | 1.4036(15) | C(20)-H(20B)       | 0.9800     |
| C(9)-H(9)        | 0.9500     | C(20)-H(20C)       | 0.9800     |
| C(10)-C(11)      | 1.5365(16) |                    |            |
| C(18)-O(3)-C(19) | 116.30(10) | C(6)-C(5)-H(5)     | 117.3      |
| C(5)-N(1)-C(4)   | 119.53(9)  | C(5)-C(6)-C(7)     | 119.82(10) |
| C(5)-N(1)-C(10)  | 118.74(9)  | C(5)-C(6)-C(18)    | 118.27(10) |
| C(4)-N(1)-C(10)  | 121.53(9)  | C(7)-C(6)-C(18)    | 121.90(10) |
| F(1)-C(1)-C(9)   | 118.53(11) | O(1)-C(7)-C(6)     | 125.68(11) |
| F(1)-C(1)-C(2)   | 118.43(11) | O(1)-C(7)-C(8)     | 120.49(11) |
| C(9)-C(1)-C(2)   | 123.03(11) | C(6)-C(7)-C(8)     | 113.83(9)  |
| C(3)-C(2)-C(1)   | 118.46(11) | C(9)-C(8)-C(4)     | 119.27(10) |
| C(3)-C(2)-H(2)   | 120.8      | C(9)-C(8)-C(7)     | 118.10(10) |
| C(1)-C(2)-H(2)   | 120.8      | C(4)-C(8)-C(7)     | 122.63(10) |
| C(2)-C(3)-C(4)   | 120.19(10) | C(1)-C(9)-C(8)     | 118.98(11) |
| C(2)-C(3)-H(3)   | 119.9      | C(1)-C(9)-H(9)     | 120.5      |
| C(4)-C(3)-H(3)   | 119.9      | C(8)-C(9)-H(9)     | 120.5      |
| N(1)-C(4)-C(8)   | 118.77(9)  | N(1)-C(10)-C(11)   | 112.43(9)  |
| N(1)-C(4)-C(3)   | 121.17(10) | N(1)-C(10)-H(10A)  | 109.1      |
| C(8)-C(4)-C(3)   | 120.06(10) | C(11)-C(10)-H(10A) | 109.1      |
| N(1)-C(5)-C(6)   | 125.35(11) | N(1)-C(10)-H(10B)  | 109.1      |
| N(1)-C(5)-H(5)   | 117.3      | C(11)-C(10)-H(10B) | 109.1      |

|                     |            |                     |            |
|---------------------|------------|---------------------|------------|
| H(10A)-C(10)-H(10B) | 107.9      | C(15)-C(16)-H(16)   | 120.0      |
| C(12)-C(11)-C(10)   | 112.07(9)  | C(17)-C(16)-H(16)   | 120.0      |
| C(12)-C(11)-H(11A)  | 109.2      | C(16)-C(17)-C(12)   | 120.93(11) |
| C(10)-C(11)-H(11A)  | 109.2      | C(16)-C(17)-H(17)   | 119.5      |
| C(12)-C(11)-H(11B)  | 109.2      | C(12)-C(17)-H(17)   | 119.5      |
| C(10)-C(11)-H(11B)  | 109.2      | O(2)-C(18)-O(3)     | 122.91(11) |
| H(11A)-C(11)-H(11B) | 107.9      | O(2)-C(18)-C(6)     | 125.47(12) |
| C(13)-C(12)-C(17)   | 118.61(11) | O(3)-C(18)-C(6)     | 111.62(9)  |
| C(13)-C(12)-C(11)   | 121.18(10) | O(3)-C(19)-C(20)    | 110.26(11) |
| C(17)-C(12)-C(11)   | 120.14(10) | O(3)-C(19)-H(19A)   | 109.6      |
| C(12)-C(13)-C(14)   | 120.63(11) | C(20)-C(19)-H(19A)  | 109.6      |
| C(12)-C(13)-H(13)   | 119.7      | O(3)-C(19)-H(19B)   | 109.6      |
| C(14)-C(13)-H(13)   | 119.7      | C(20)-C(19)-H(19B)  | 109.6      |
| C(15)-C(14)-C(13)   | 120.32(12) | H(19A)-C(19)-H(19B) | 108.1      |
| C(15)-C(14)-H(14)   | 119.8      | C(19)-C(20)-H(20A)  | 109.5      |
| C(13)-C(14)-H(14)   | 119.8      | C(19)-C(20)-H(20B)  | 109.5      |
| C(16)-C(15)-C(14)   | 119.50(12) | H(20A)-C(20)-H(20B) | 109.5      |
| C(16)-C(15)-H(15)   | 120.2      | C(19)-C(20)-H(20C)  | 109.5      |
| C(14)-C(15)-H(15)   | 120.2      | H(20A)-C(20)-H(20C) | 109.5      |
| C(15)-C(16)-C(17)   | 120.00(12) | H(20B)-C(20)-H(20C) | 109.5      |

---

Table 4. Anisotropic displacement parameters ( $\text{\AA}^2 \times 10^3$ ) for KEVJAG-1-64. The anisotropic displacement factor exponent takes the form:  
 $-2 \pi^2 [h^2 a^2 U_{11} + \dots + 2 h k a^* b^* U_{12}]$

|       | $U_{11}$ | $U_{22}$ | $U_{33}$ | $U_{23}$ | $U_{13}$ | $U_{12}$ |
|-------|----------|----------|----------|----------|----------|----------|
| F(1)  | 21(1)    | 30(1)    | 25(1)    | -1(1)    | 8(1)     | 3(1)     |
| O(1)  | 29(1)    | 10(1)    | 33(1)    | -2(1)    | 5(1)     | 2(1)     |
| O(2)  | 39(1)    | 12(1)    | 26(1)    | 2(1)     | 6(1)     | -2(1)    |
| O(3)  | 22(1)    | 18(1)    | 21(1)    | 3(1)     | 3(1)     | -2(1)    |
| N(1)  | 17(1)    | 9(1)     | 15(1)    | 1(1)     | 0(1)     | 1(1)     |
| C(1)  | 17(1)    | 22(1)    | 15(1)    | -2(1)    | 1(1)     | 1(1)     |
| C(2)  | 21(1)    | 18(1)    | 15(1)    | 1(1)     | 2(1)     | -2(1)    |
| C(3)  | 21(1)    | 12(1)    | 16(1)    | 1(1)     | 1(1)     | 0(1)     |
| C(4)  | 16(1)    | 11(1)    | 13(1)    | -1(1)    | -1(1)    | 0(1)     |
| C(5)  | 17(1)    | 11(1)    | 15(1)    | 0(1)     | 0(1)     | -1(1)    |
| C(6)  | 19(1)    | 10(1)    | 16(1)    | 1(1)     | -1(1)    | -1(1)    |
| C(7)  | 18(1)    | 11(1)    | 17(1)    | -1(1)    | -2(1)    | 0(1)     |
| C(8)  | 17(1)    | 12(1)    | 14(1)    | -1(1)    | -2(1)    | 1(1)     |
| C(9)  | 19(1)    | 16(1)    | 16(1)    | -2(1)    | 0(1)     | 2(1)     |
| C(10) | 20(1)    | 10(1)    | 17(1)    | 0(1)     | 0(1)     | 3(1)     |
| C(11) | 22(1)    | 11(1)    | 18(1)    | -1(1)    | 1(1)     | -1(1)    |
| C(12) | 16(1)    | 13(1)    | 16(1)    | -2(1)    | 0(1)     | -1(1)    |
| C(13) | 17(1)    | 19(1)    | 19(1)    | -2(1)    | 1(1)     | 2(1)     |
| C(14) | 20(1)    | 27(1)    | 19(1)    | 0(1)     | 3(1)     | 0(1)     |
| C(15) | 26(1)    | 24(1)    | 21(1)    | 4(1)     | -2(1)    | -1(1)    |
| C(16) | 22(1)    | 23(1)    | 26(1)    | 2(1)     | -2(1)    | 6(1)     |
| C(17) | 17(1)    | 20(1)    | 22(1)    | -1(1)    | 2(1)     | 3(1)     |
| C(18) | 23(1)    | 14(1)    | 15(1)    | -1(1)    | -1(1)    | -4(1)    |
| C(19) | 31(1)    | 22(1)    | 20(1)    | 2(1)     | 4(1)     | -9(1)    |
| C(20) | 42(1)    | 22(1)    | 20(1)    | 2(1)     | 2(1)     | 1(1)     |

Table 5. Hydrogen coordinates and isotropic displacement parameters for KEVJAG-1-64.

|        | x         | y        | z        | U(eq) |
|--------|-----------|----------|----------|-------|
| H(2)   | 1.217003  | 0.665844 | 0.151551 | 0.021 |
| H(3)   | 0.874620  | 0.698431 | 0.215784 | 0.020 |
| H(5)   | 0.359545  | 0.535257 | 0.345089 | 0.017 |
| H(9)   | 1.144612  | 0.402728 | 0.195190 | 0.020 |
| H(10A) | 0.342888  | 0.677085 | 0.308438 | 0.019 |
| H(10B) | 0.523916  | 0.712218 | 0.251518 | 0.019 |
| H(11A) | 0.823167  | 0.739584 | 0.332217 | 0.021 |
| H(11B) | 0.583082  | 0.788269 | 0.357059 | 0.021 |
| H(13)  | 0.351176  | 0.721884 | 0.453463 | 0.022 |
| H(14)  | 0.361095  | 0.635699 | 0.551942 | 0.026 |
| H(15)  | 0.687320  | 0.541340 | 0.573572 | 0.028 |
| H(16)  | 1.004075  | 0.533760 | 0.495958 | 0.028 |
| H(17)  | 0.990365  | 0.617922 | 0.396513 | 0.023 |
| H(19A) | 0.079435  | 0.287785 | 0.410675 | 0.029 |
| H(19B) | -0.074802 | 0.372690 | 0.434038 | 0.029 |
| H(20A) | 0.360889  | 0.313940 | 0.495409 | 0.042 |
| H(20B) | 0.101376  | 0.312490 | 0.530087 | 0.042 |
| H(20C) | 0.232162  | 0.405636 | 0.515577 | 0.042 |

Table 6. Torsion angles [°] for KEVJAG-1-64.

|                      |             |                         |             |
|----------------------|-------------|-------------------------|-------------|
| F(1)-C(1)-C(2)-C(3)  | -179.16(10) | F(1)-C(1)-C(9)-C(8)     | 178.54(10)  |
| C(9)-C(1)-C(2)-C(3)  | -0.47(18)   | C(2)-C(1)-C(9)-C(8)     | -0.15(18)   |
| C(1)-C(2)-C(3)-C(4)  | 0.58(17)    | C(4)-C(8)-C(9)-C(1)     | 0.64(16)    |
| C(5)-N(1)-C(4)-C(8)  | 2.49(15)    | C(7)-C(8)-C(9)-C(1)     | -179.20(10) |
| C(10)-N(1)-C(4)-C(8) | 177.34(10)  | C(5)-N(1)-C(10)-C(11)   | 95.41(12)   |
| C(5)-N(1)-C(4)-C(3)  | -177.22(10) | C(4)-N(1)-C(10)-C(11)   | -79.48(12)  |
| C(10)-N(1)-C(4)-C(3) | -2.37(15)   | N(1)-C(10)-C(11)-C(12)  | -53.66(13)  |
| C(2)-C(3)-C(4)-N(1)  | 179.60(10)  | C(10)-C(11)-C(12)-C(13) | -83.29(13)  |
| C(2)-C(3)-C(4)-C(8)  | -0.10(16)   | C(10)-C(11)-C(12)-C(17) | 93.64(13)   |
| C(4)-N(1)-C(5)-C(6)  | -2.56(17)   | C(17)-C(12)-C(13)-C(14) | -0.55(18)   |
| C(10)-N(1)-C(5)-C(6) | -177.56(11) | C(11)-C(12)-C(13)-C(14) | 176.42(11)  |
| N(1)-C(5)-C(6)-C(7)  | 0.36(18)    | C(12)-C(13)-C(14)-C(15) | 0.61(19)    |
| N(1)-C(5)-C(6)-C(18) | 179.98(10)  | C(13)-C(14)-C(15)-C(16) | 0.0(2)      |
| C(5)-C(6)-C(7)-O(1)  | -177.80(12) | C(14)-C(15)-C(16)-C(17) | -0.6(2)     |
| C(18)-C(6)-C(7)-O(1) | 2.59(18)    | C(15)-C(16)-C(17)-C(12) | 0.7(2)      |
| C(5)-C(6)-C(7)-C(8)  | 1.65(15)    | C(13)-C(12)-C(17)-C(16) | -0.10(18)   |
| C(18)-C(6)-C(7)-C(8) | -177.95(10) | C(11)-C(12)-C(17)-C(16) | -177.11(11) |
| N(1)-C(4)-C(8)-C(9)  | 179.77(10)  | C(19)-O(3)-C(18)-O(2)   | 4.70(17)    |
| C(3)-C(4)-C(8)-C(9)  | -0.52(16)   | C(19)-O(3)-C(18)-C(6)   | -175.23(10) |
| N(1)-C(4)-C(8)-C(7)  | -0.40(16)   | C(5)-C(6)-C(18)-O(2)    | -175.00(12) |
| C(3)-C(4)-C(8)-C(7)  | 179.31(10)  | C(7)-C(6)-C(18)-O(2)    | 4.61(19)    |
| O(1)-C(7)-C(8)-C(9)  | -2.30(17)   | C(5)-C(6)-C(18)-O(3)    | 4.93(15)    |
| C(6)-C(7)-C(8)-C(9)  | 178.22(10)  | C(7)-C(6)-C(18)-O(3)    | -175.46(10) |
| O(1)-C(7)-C(8)-C(4)  | 177.88(11)  | C(18)-O(3)-C(19)-C(20)  | 82.56(14)   |
| C(6)-C(7)-C(8)-C(4)  | -1.61(15)   |                         |             |

Table 7. Hydrogen bonds for KEVJAG-1-64[Å and °].

| D-H...A               | d(D-H) | d(H...A) | d(D...A)   | <(DHA) |
|-----------------------|--------|----------|------------|--------|
| C(2)-H(2)...O(2)#1    | 0.95   | 2.55     | 3.4406(16) | 156.2  |
| C(3)-H(3)...O(1)#1    | 0.95   | 2.55     | 3.1574(15) | 121.9  |
| C(10)-H(10B)...O(2)#2 | 0.99   | 2.49     | 3.4796(15) | 176.3  |

Symmetry transformations used to generate equivalent atoms:  
#1 -x+2, y+1/2, -z+1/2    #2 -x+1, y+1/2, -z+1/2

## References

- [1] Data Collection: APEX3 (2018) Bruker Inc., Madison, Wisconsin, USA.
- [2] Data Reduction: SAINT (2016) Bruker Inc., Madison, Wisconsin, USA.
- [3] Krause, L.; Herbst-Irmer, R.; Sheldrick, G. M.; Stalke, D. Comparison of silver and molybdenum microfocus X-ray sources for single-crystal structure determination *J. Appl. Cryst.* **2015**, *48*, 3–10. <https://doi.org/10.1107/S1600576714022985>
- [4] Sheldrick, G. M. SHELXT– Integrated space-group and crystal-structure determination. *Acta Cryst.* **2015**, *A71*, 3–8. doi:10.1107/S2053273314026370
- [5] Sheldrick, G. M. SHELXT – Integrated space-group and crystal-structure determination. *Acta Cryst.* **2015**, *C71*, 3–8. <https://doi.org/10.1107/S2053273314026370>
- [6] Parsons, S.; H. D. Flack, H. D.; Wagner, T. Use of intensity quotients and differences in absolute structure refinement. *Acta Cryst.*, **2013**, *B69*, 249-259. <https://doi.org/10.1107/S2052519213010014>
- [7] Hooft, R. W. W.; Straver, L. H.; Spek, A. L. Determination of absolute structure using Bayesian statistics on Bijvoet differences. *J. Appl. Cryst.* **2008**, *41*, 96-103. <https://doi.org/10.1107/S0021889807059870>
- [8] Spek, A.L. PLATON SQUEEZE: a tool for the calculation of the disordered solvent contribution to the calculated structure factors. *Acta Cryst.* **2015**, *C71*, 9-19. <https://doi.org/10.1107/S2053229614024929>
